# Supplementary material
Source: PubMed Central journal article supplement (PMC5698881)

## Electronic Supplementary Information

### Perfluoroalkylation of Aryl-*N,N*-dimethyl Hydrazones Using Hypervalent Iodine (III) Reagents or Perfluoroalkyl Iodides

Benjamin Janhsen and Armido Studer\*

Organisch Chemisches Institut, Westfälische Wilhelms-Universität Münster, Corrensstraße 40, 48149, Münster

studer@uni-muenster.de

#### Contents

|                   |    |
|-------------------|----|
| NMR Spectra ..... | S1 |
|-------------------|----|

## **NMR Spectra**

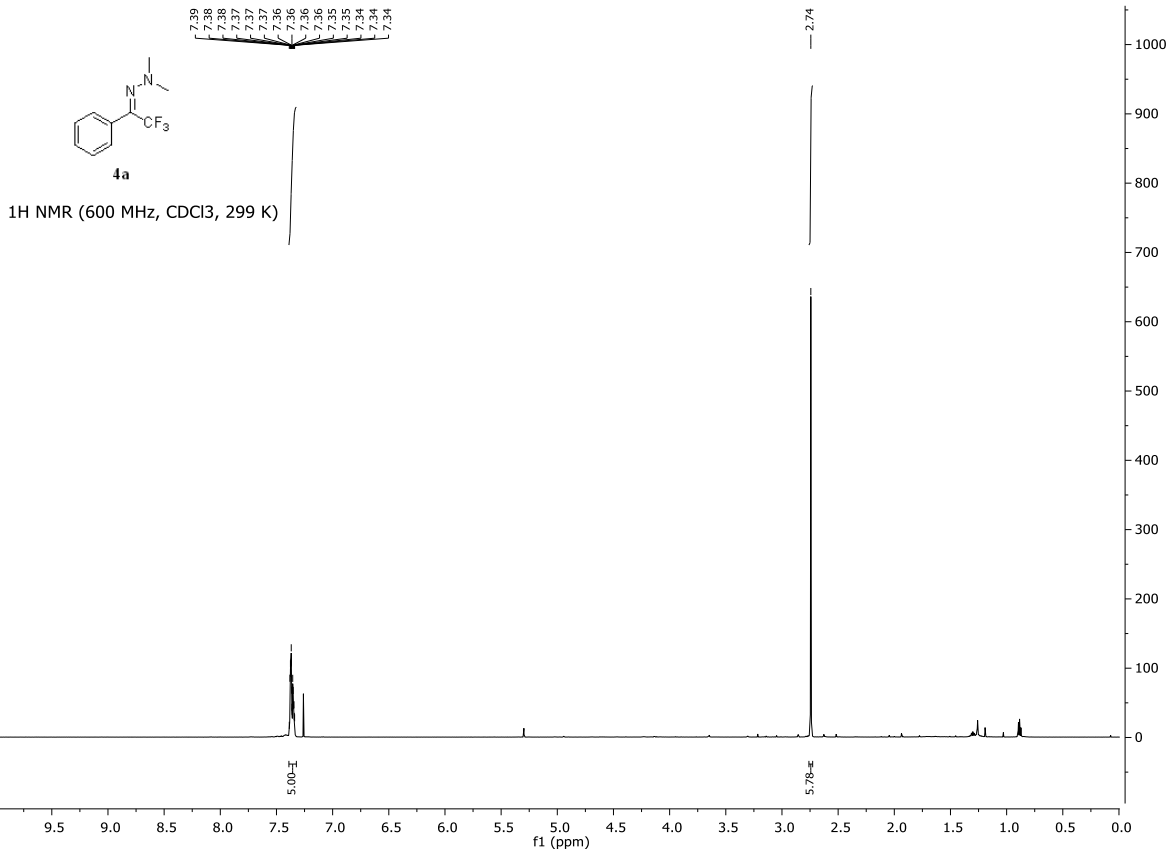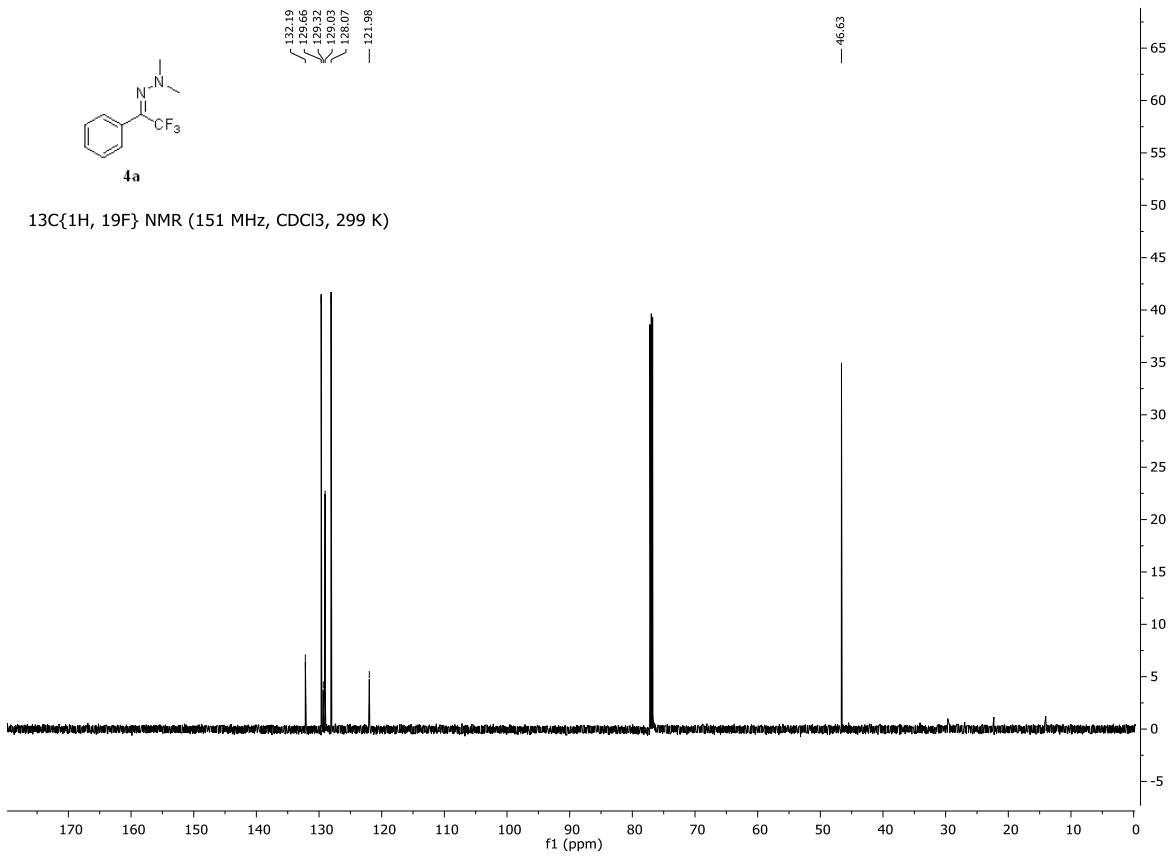

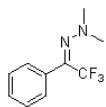

4a

19F NMR (564 MHz, CDCl3, 299 K)

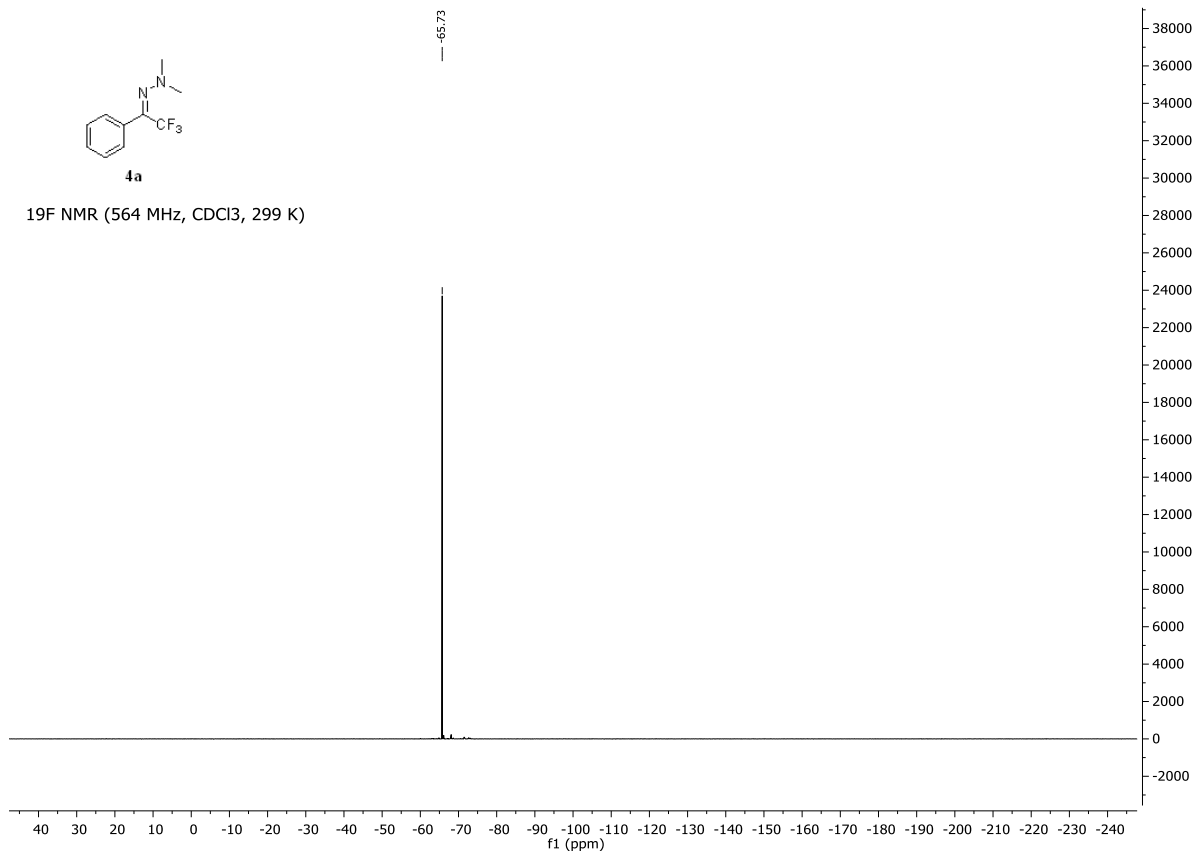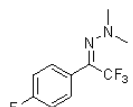

4b

1H NMR (600 MHz, CDCl3, 299 K)

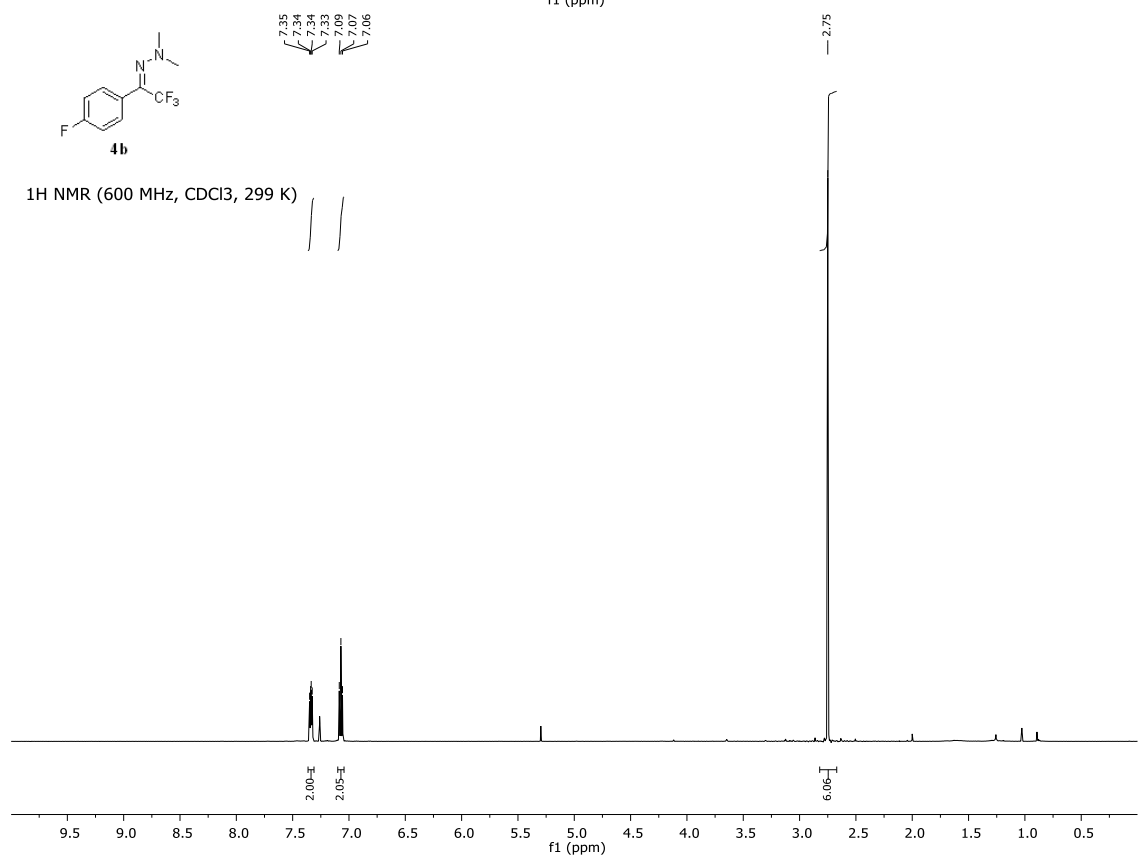

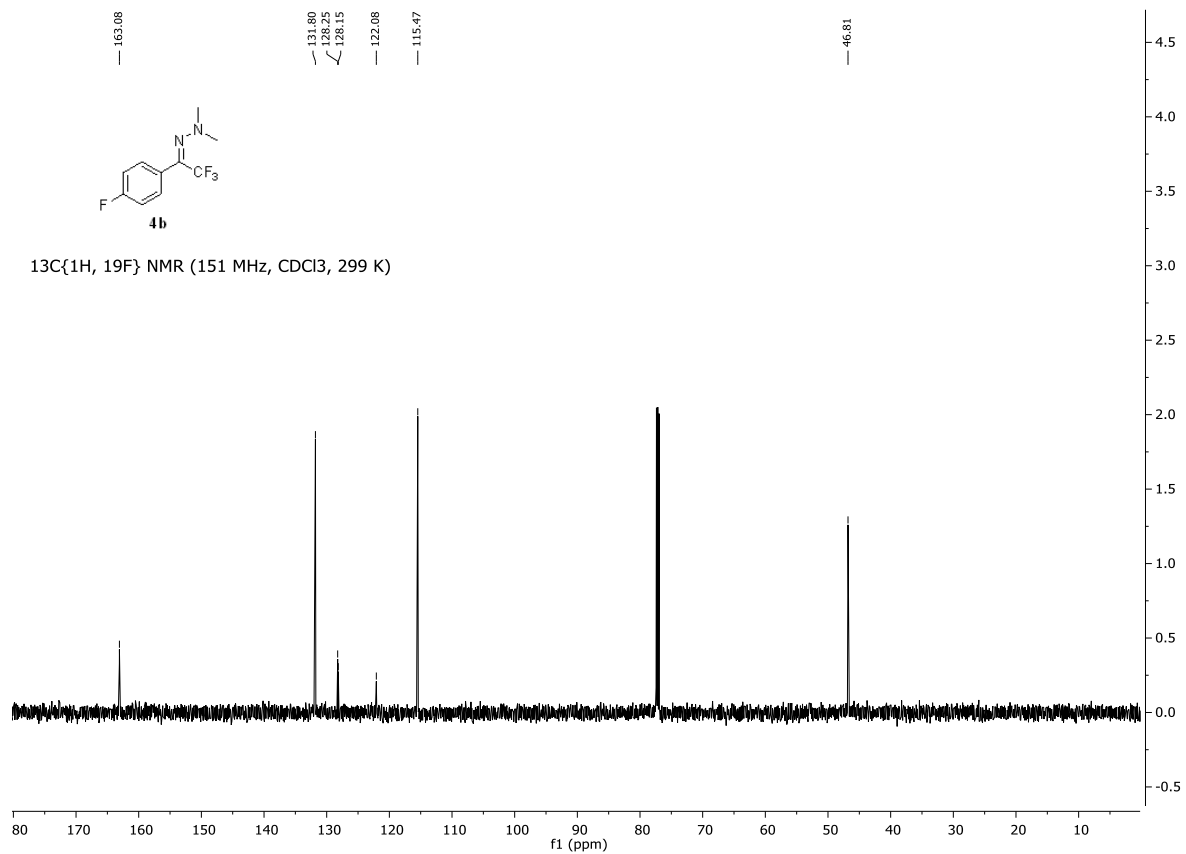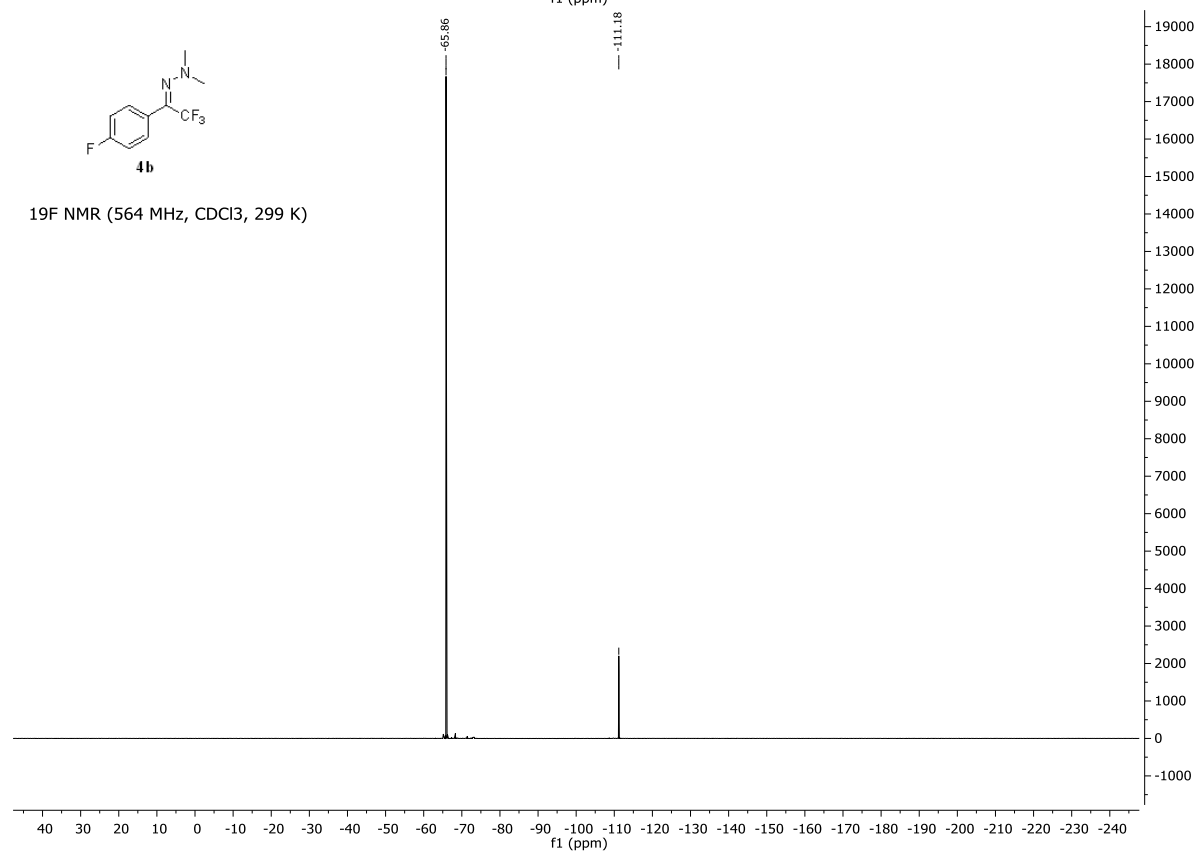

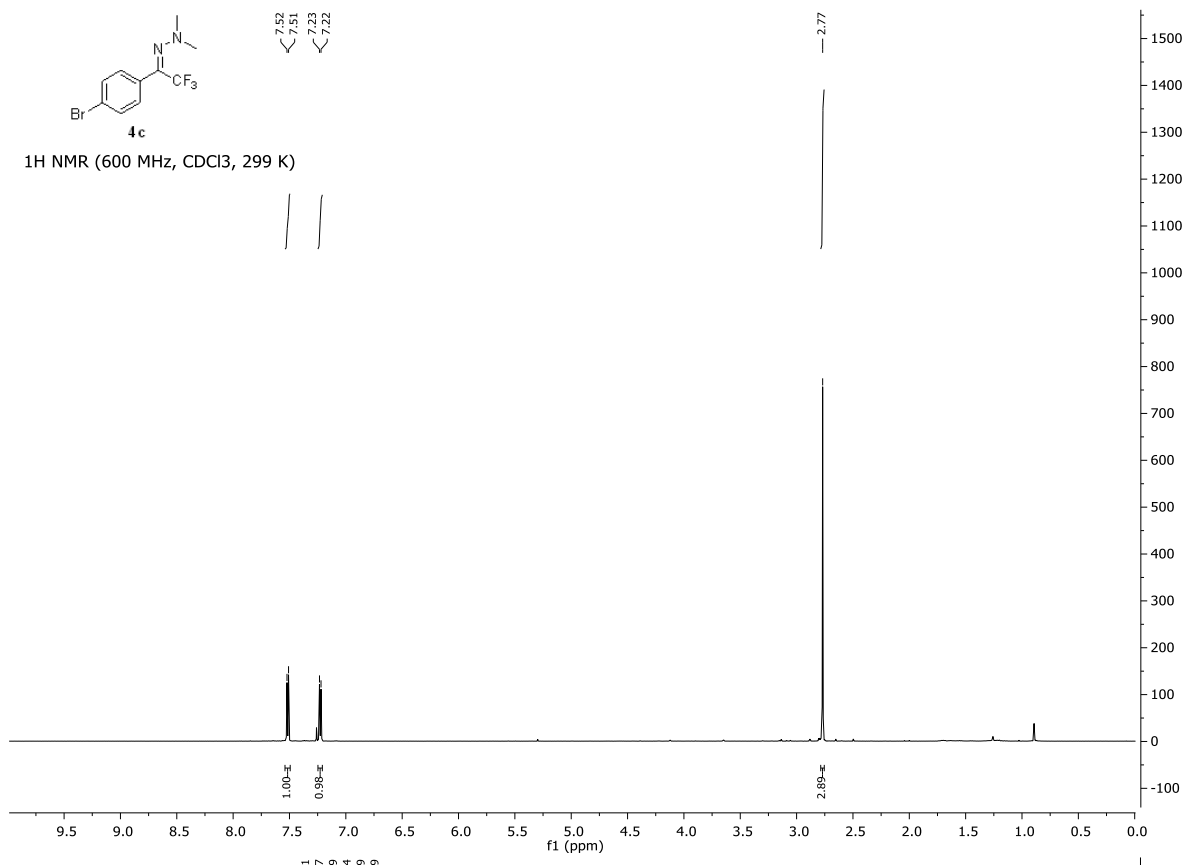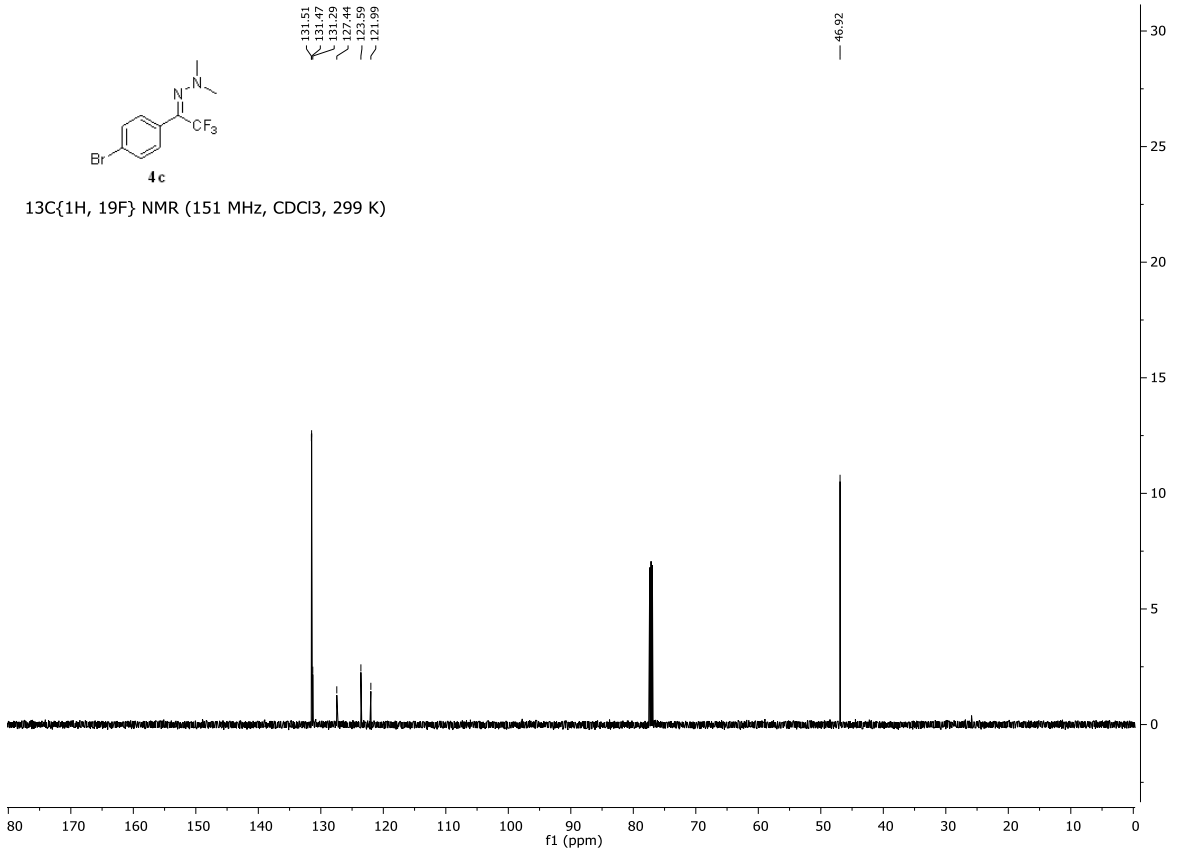

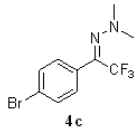

19F NMR (564 MHz, CDCl<sub>3</sub>, 299 K)

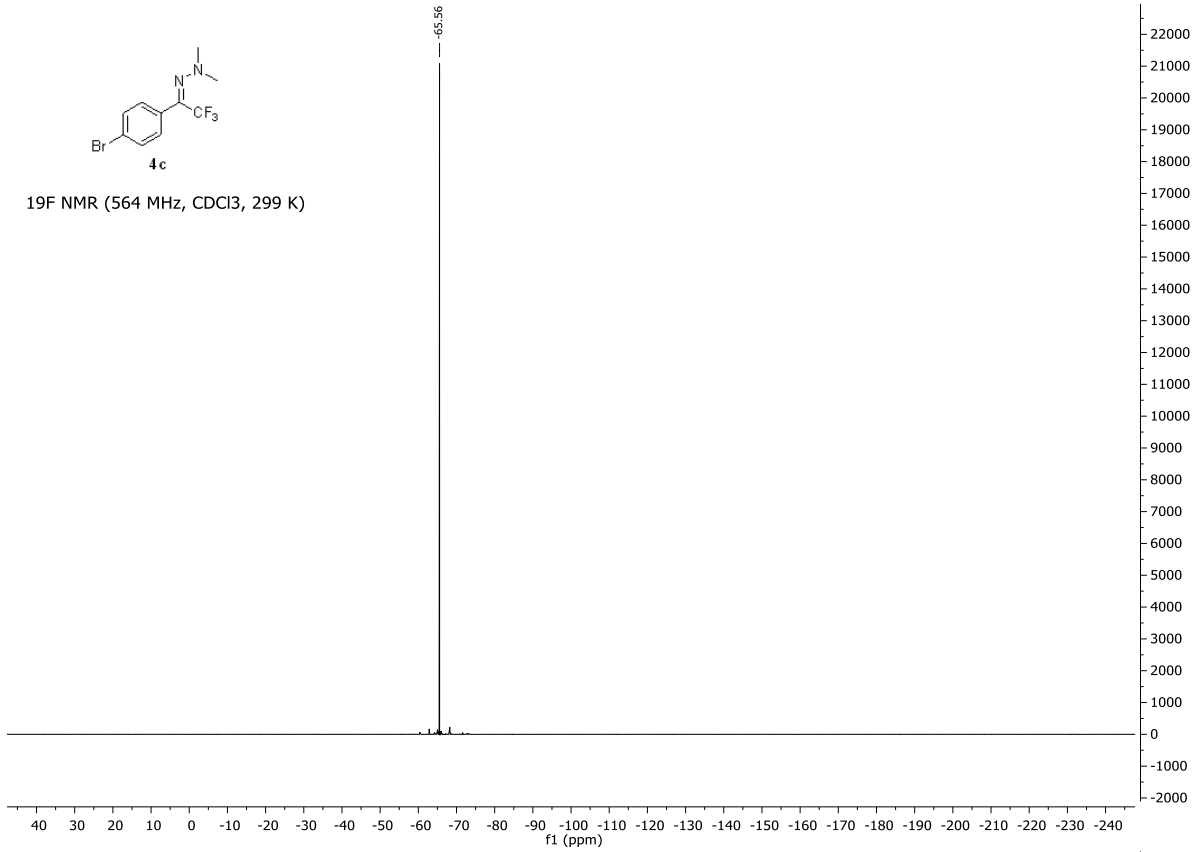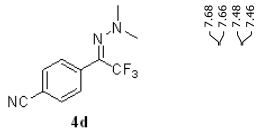

1H NMR (600 MHz, CDCl<sub>3</sub>, 299 K)

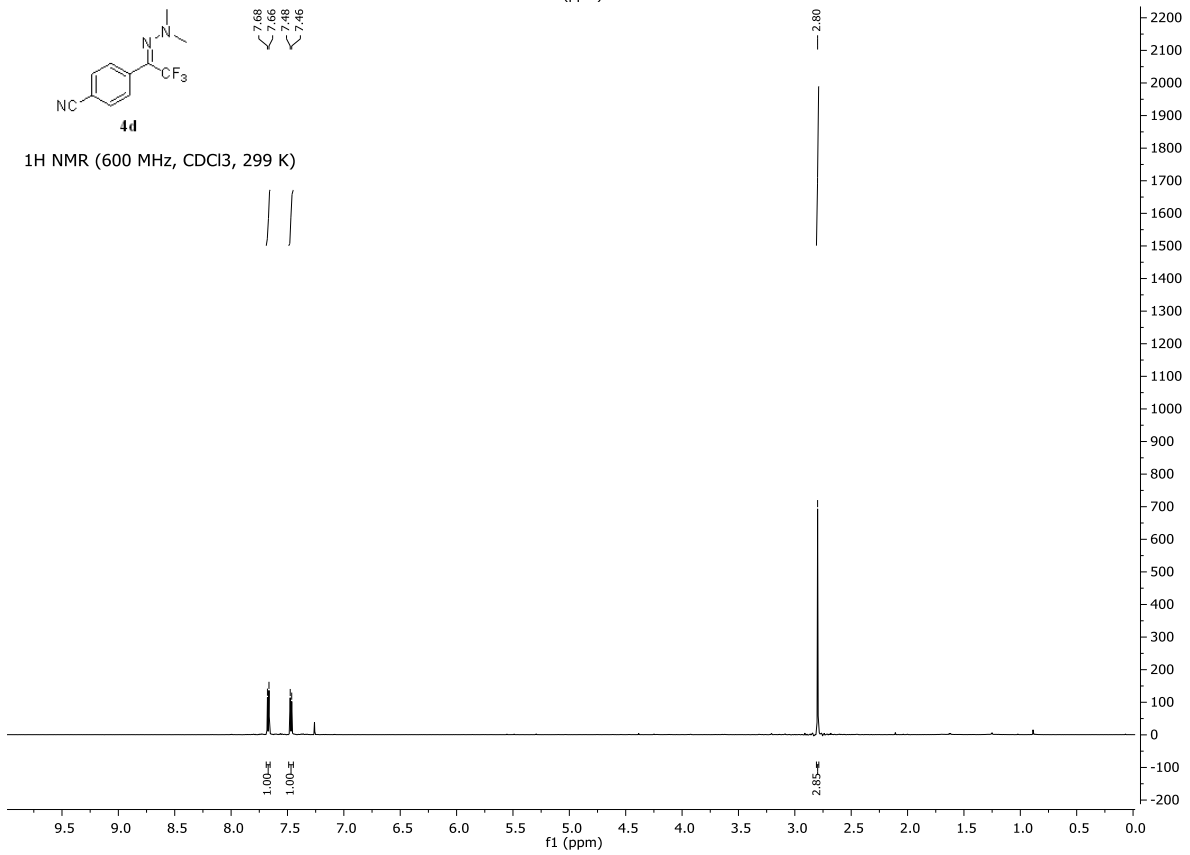

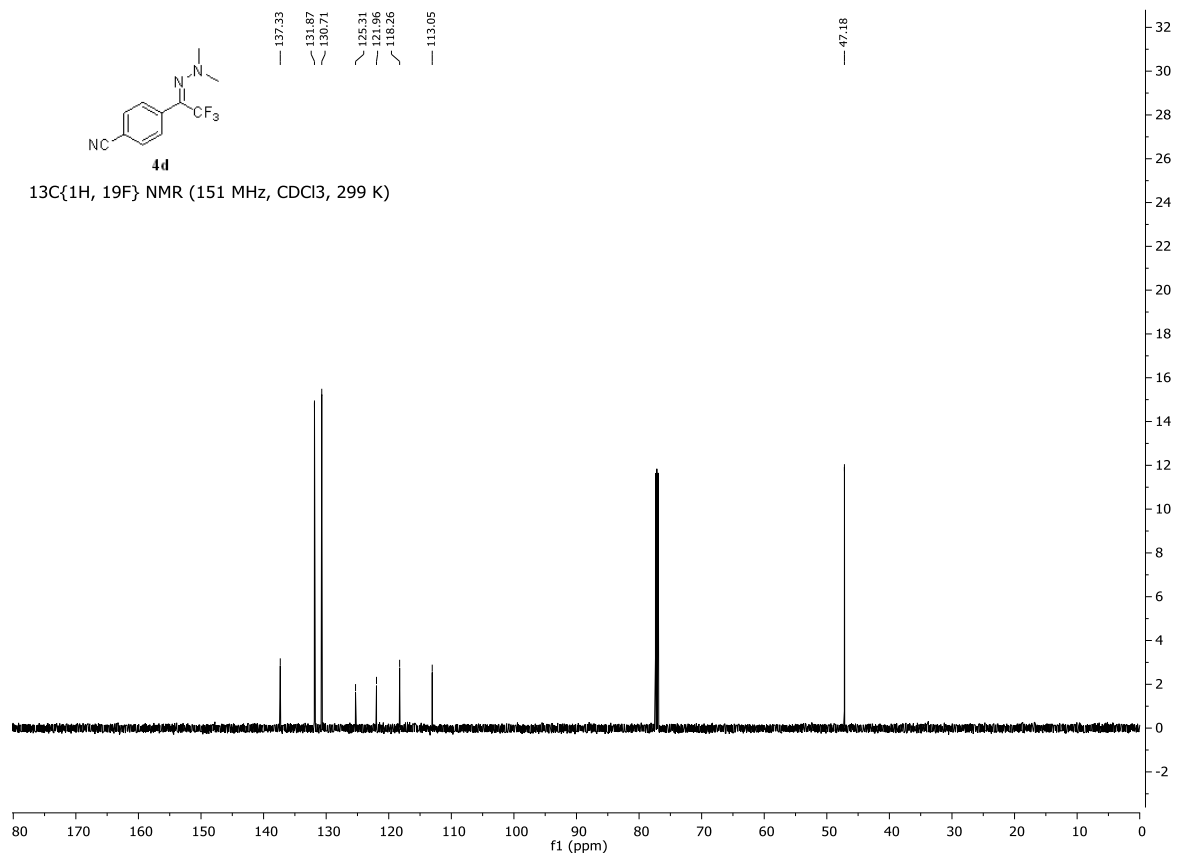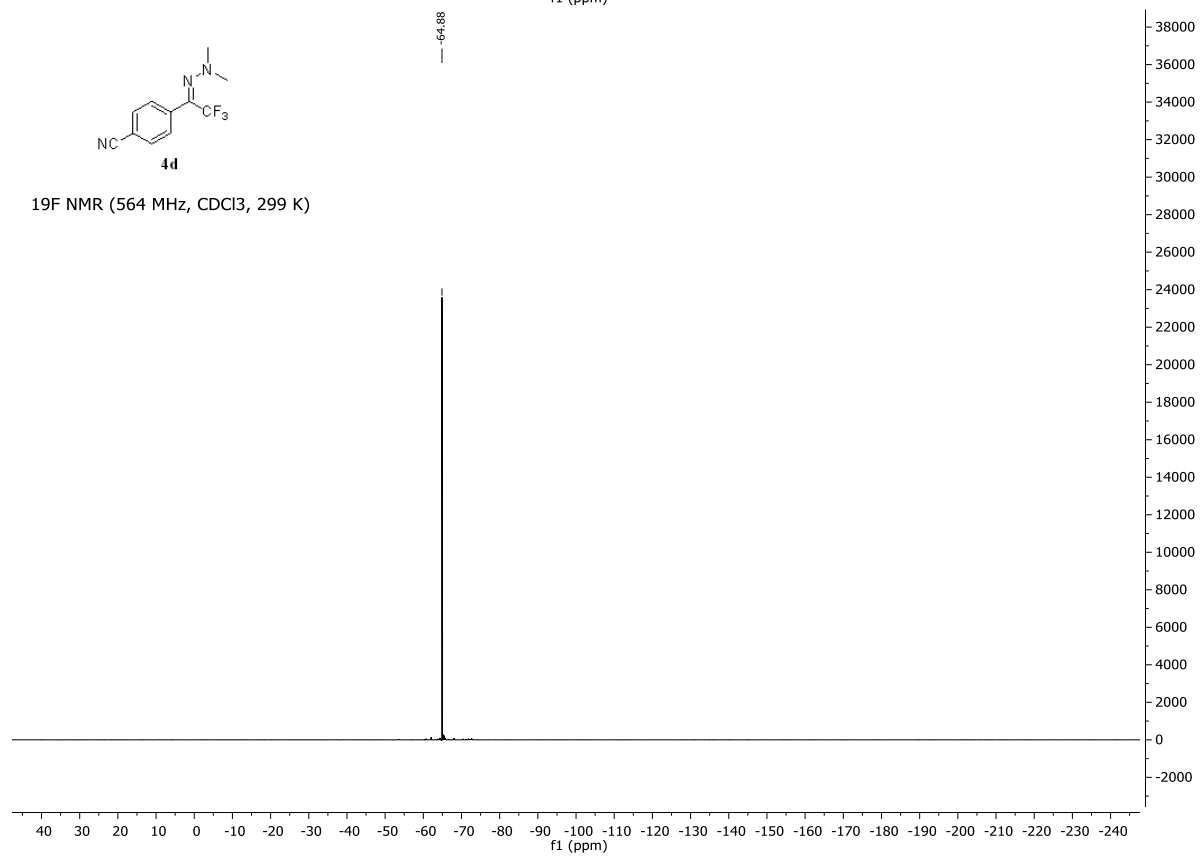



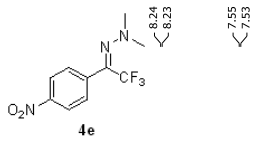

<sup>1</sup>H NMR (600 MHz, CDCl<sub>3</sub>, 299 K)

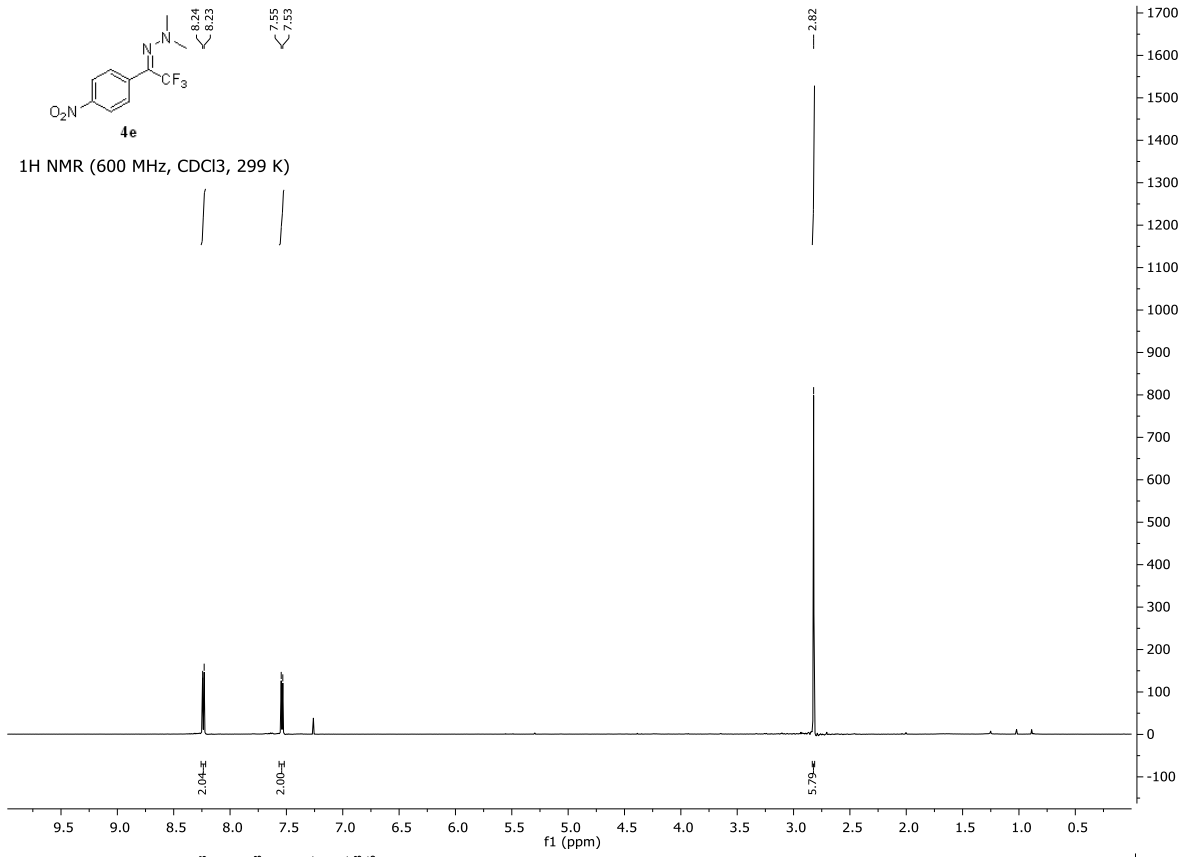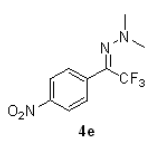

<sup>13</sup>C{<sup>1</sup>H, <sup>19</sup>F} NMR (151 MHz, CDCl<sub>3</sub>, 299 K)

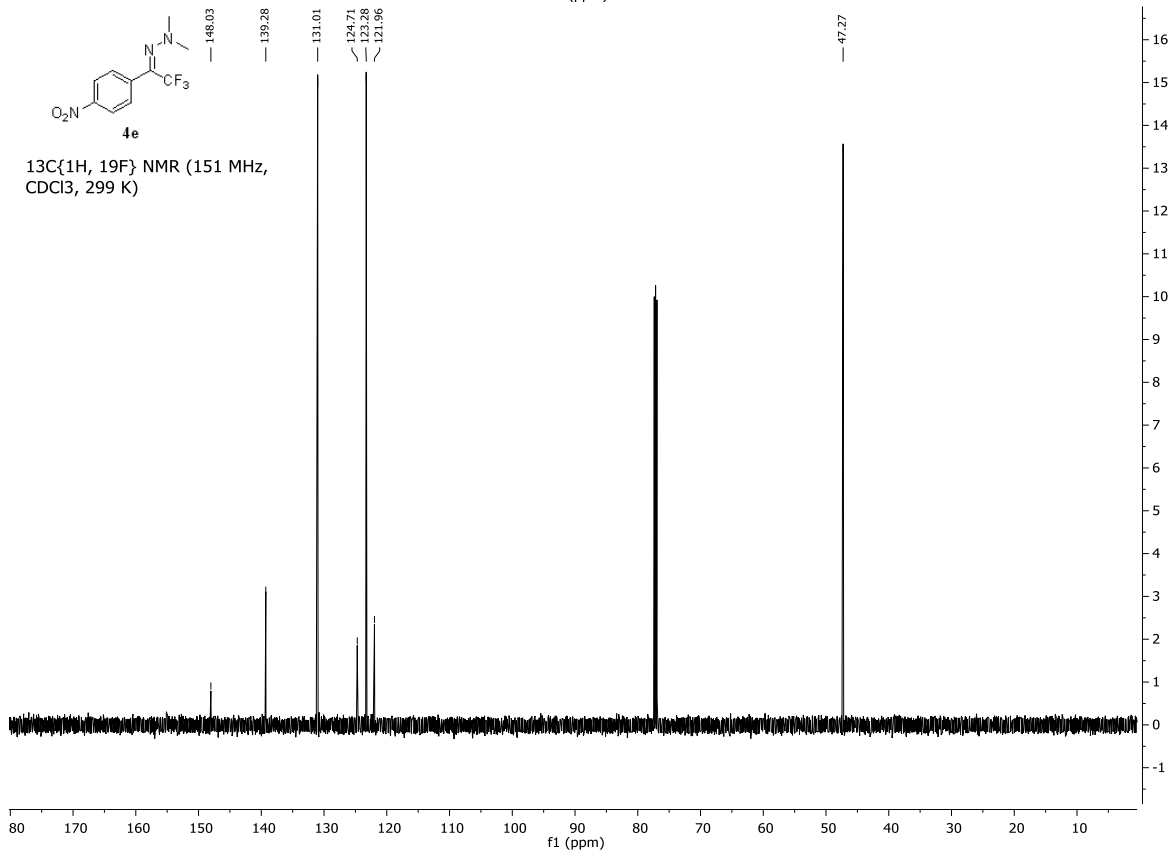

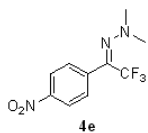

19F NMR (564 MHz, CDCl<sub>3</sub>, 299 K)

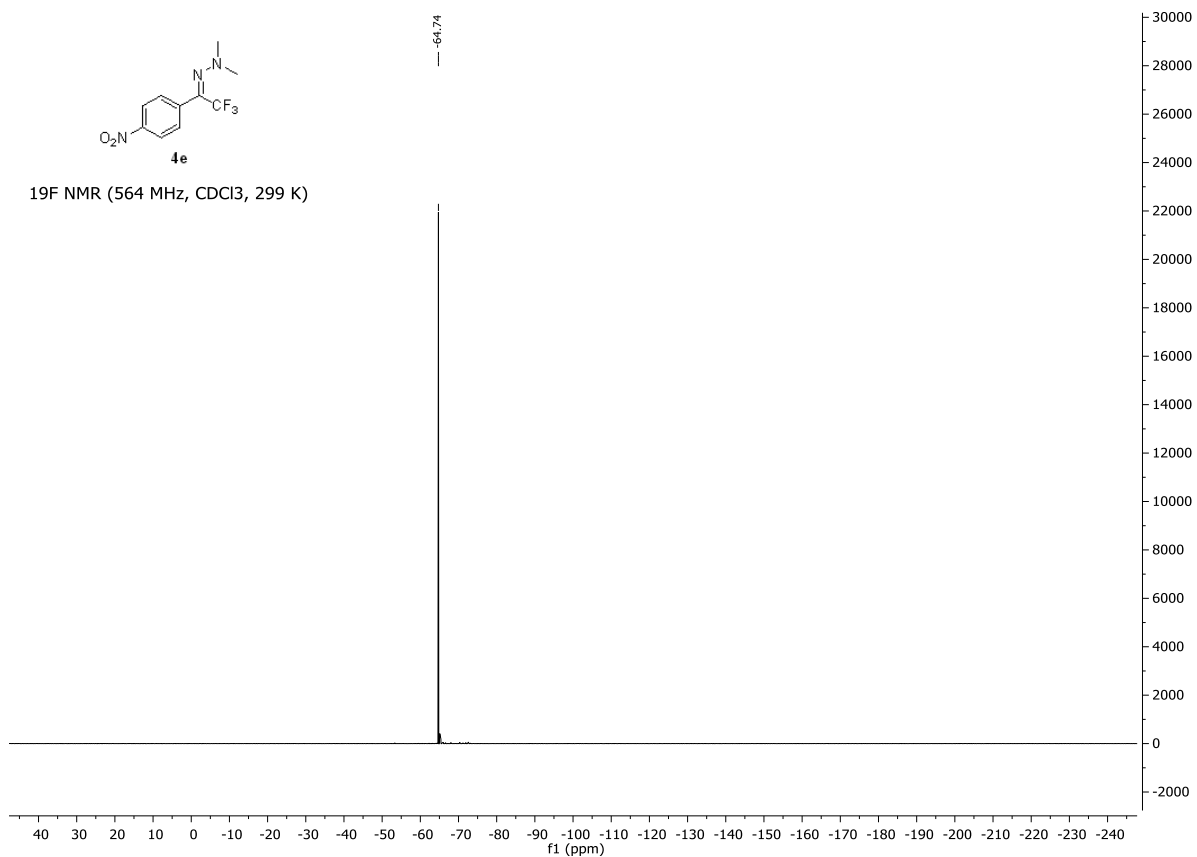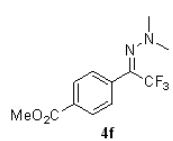

1H NMR (600 MHz, CDCl<sub>3</sub>, 299 K)

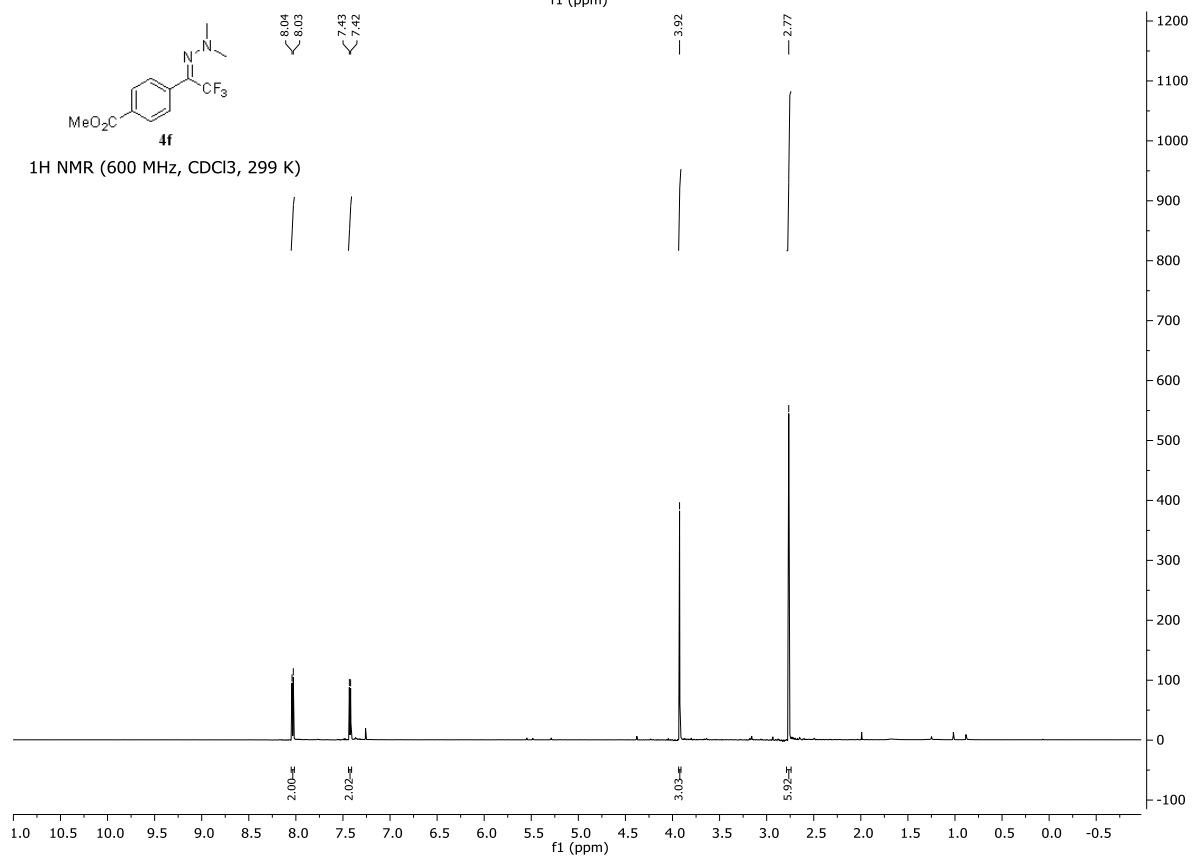

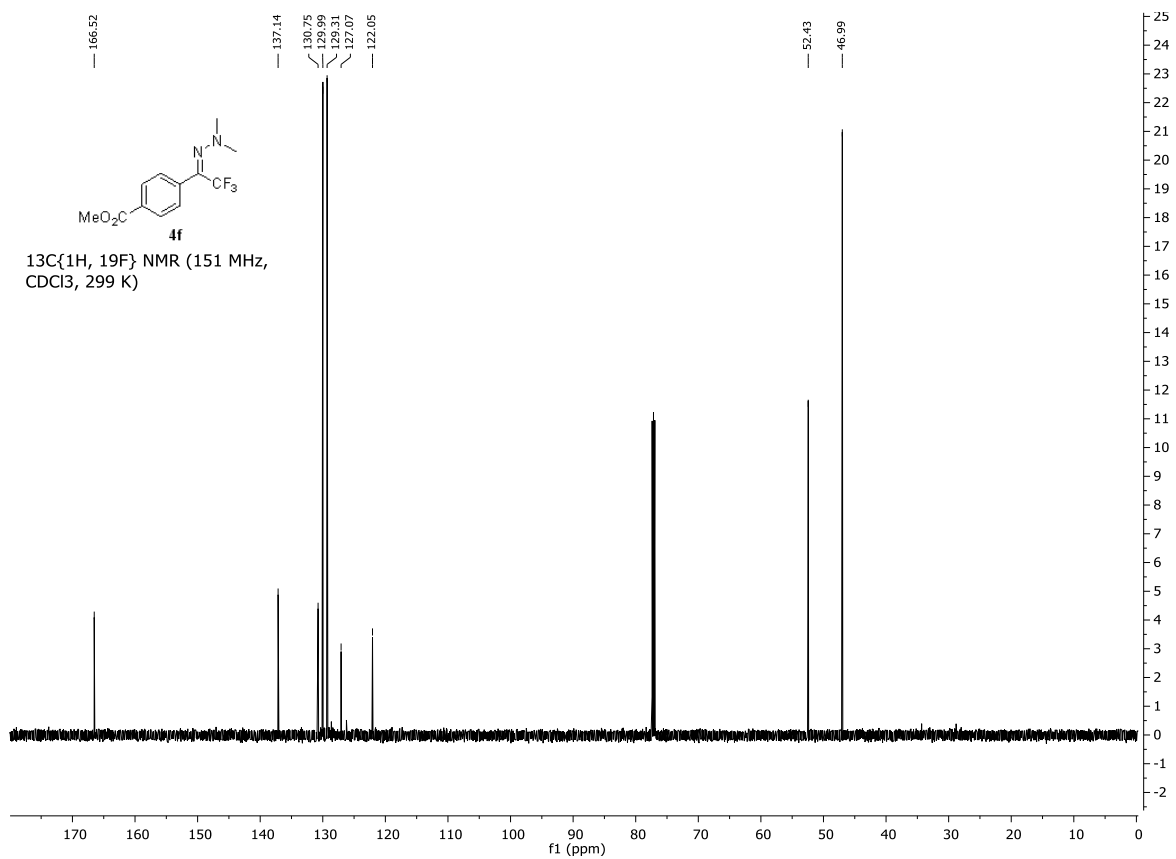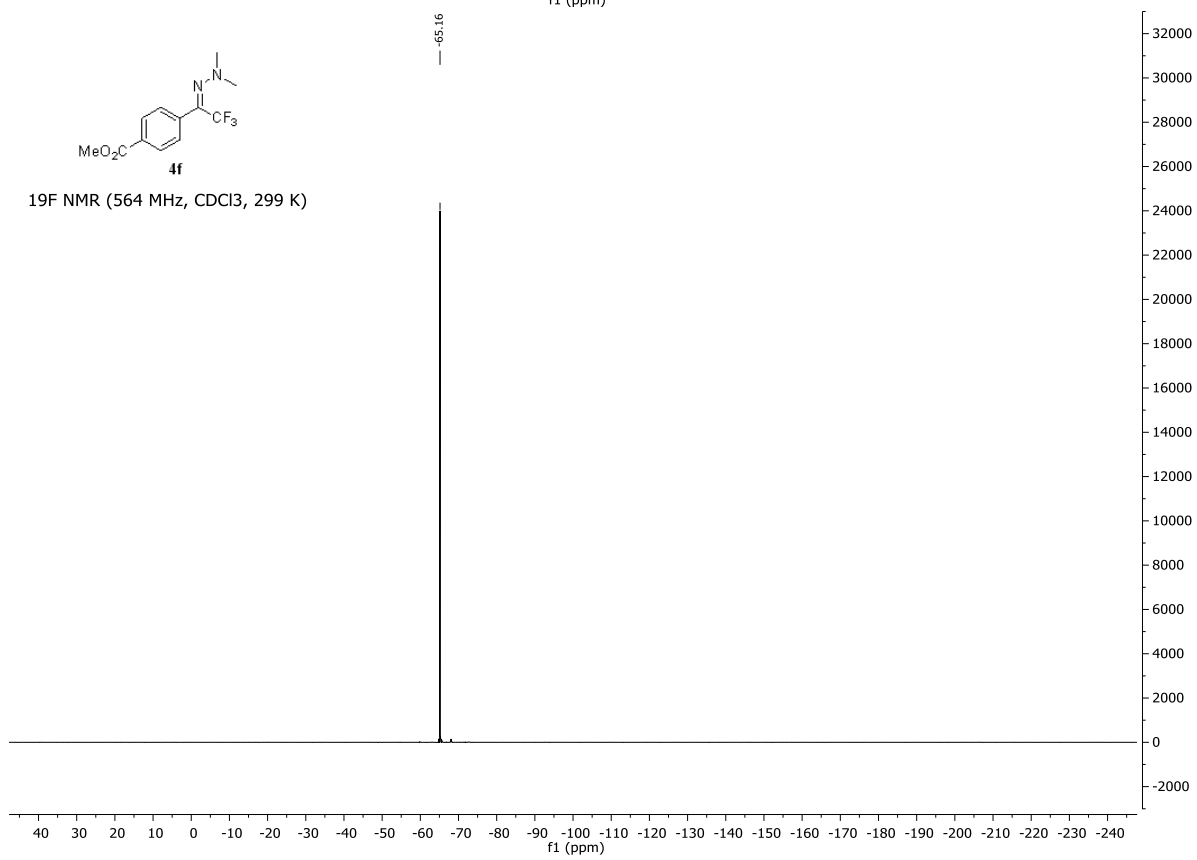

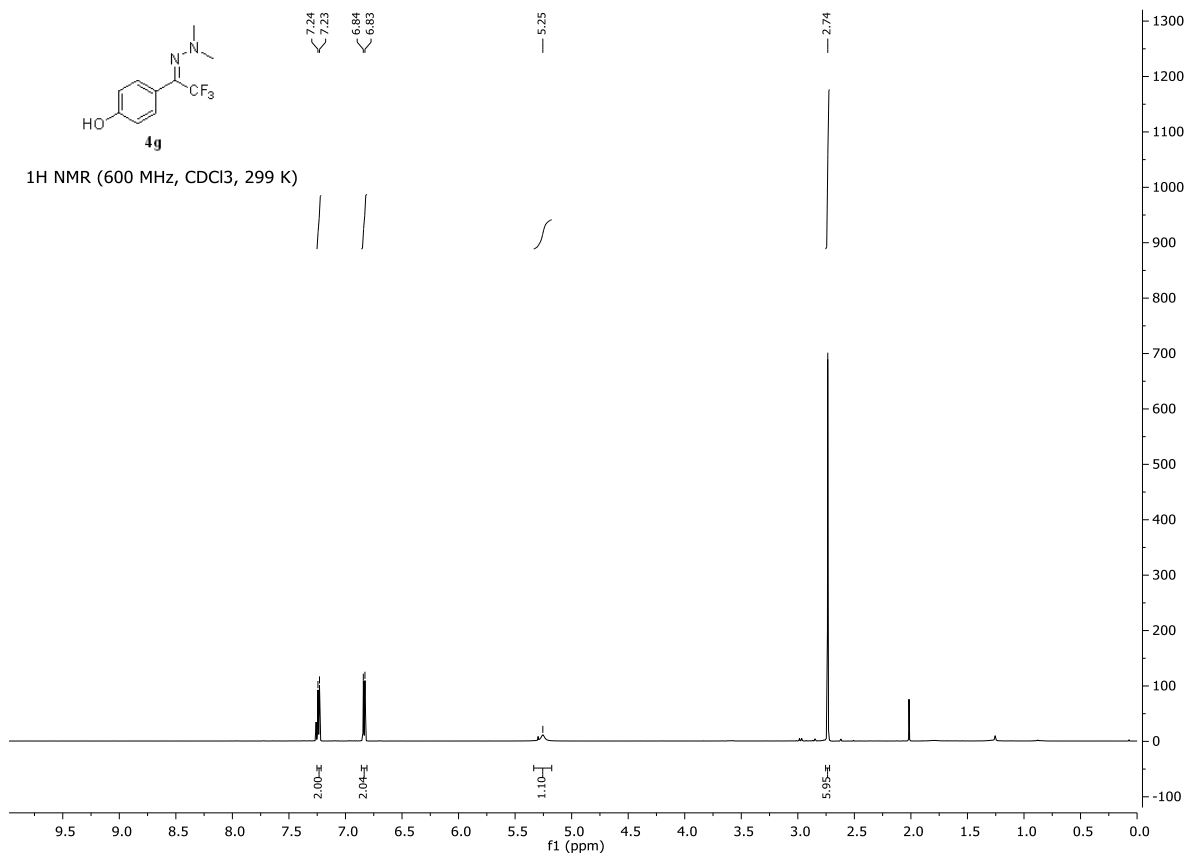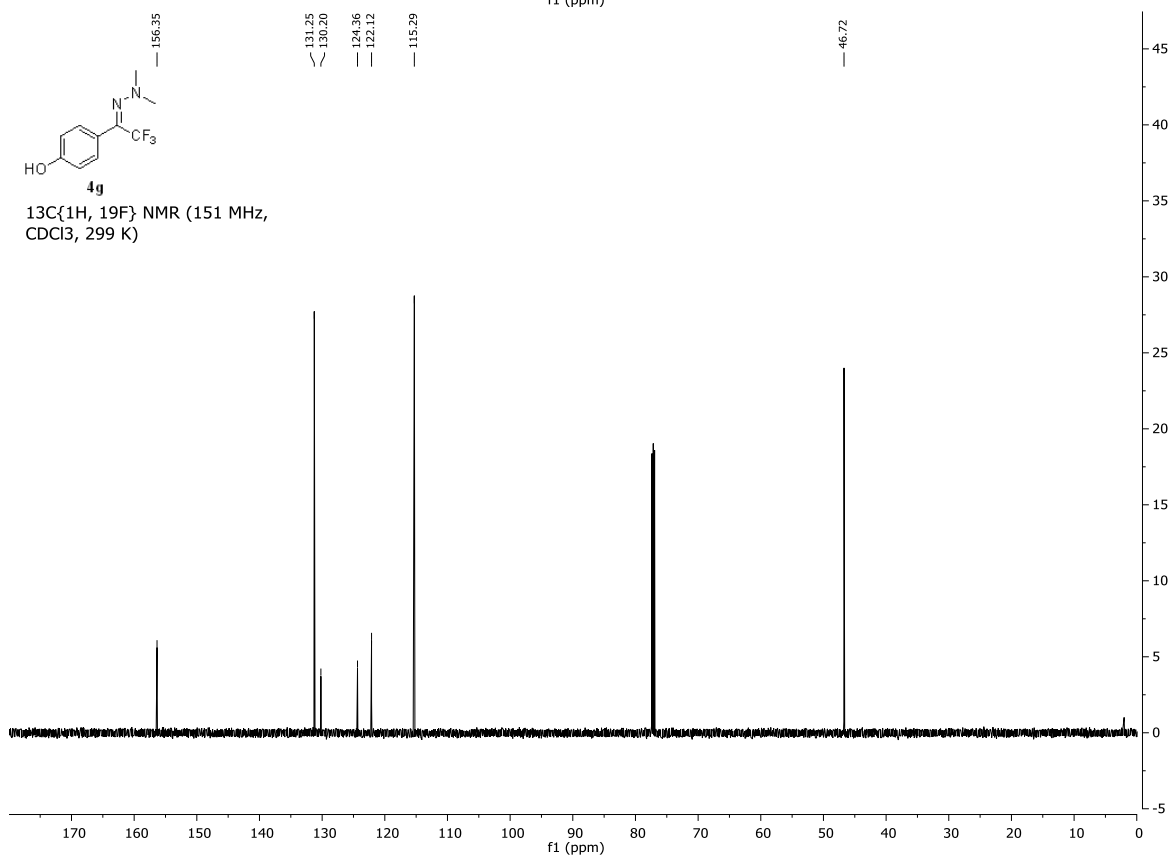

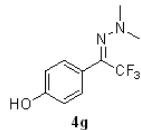

19F NMR (564 MHz, CDCl<sub>3</sub>, 299 K)

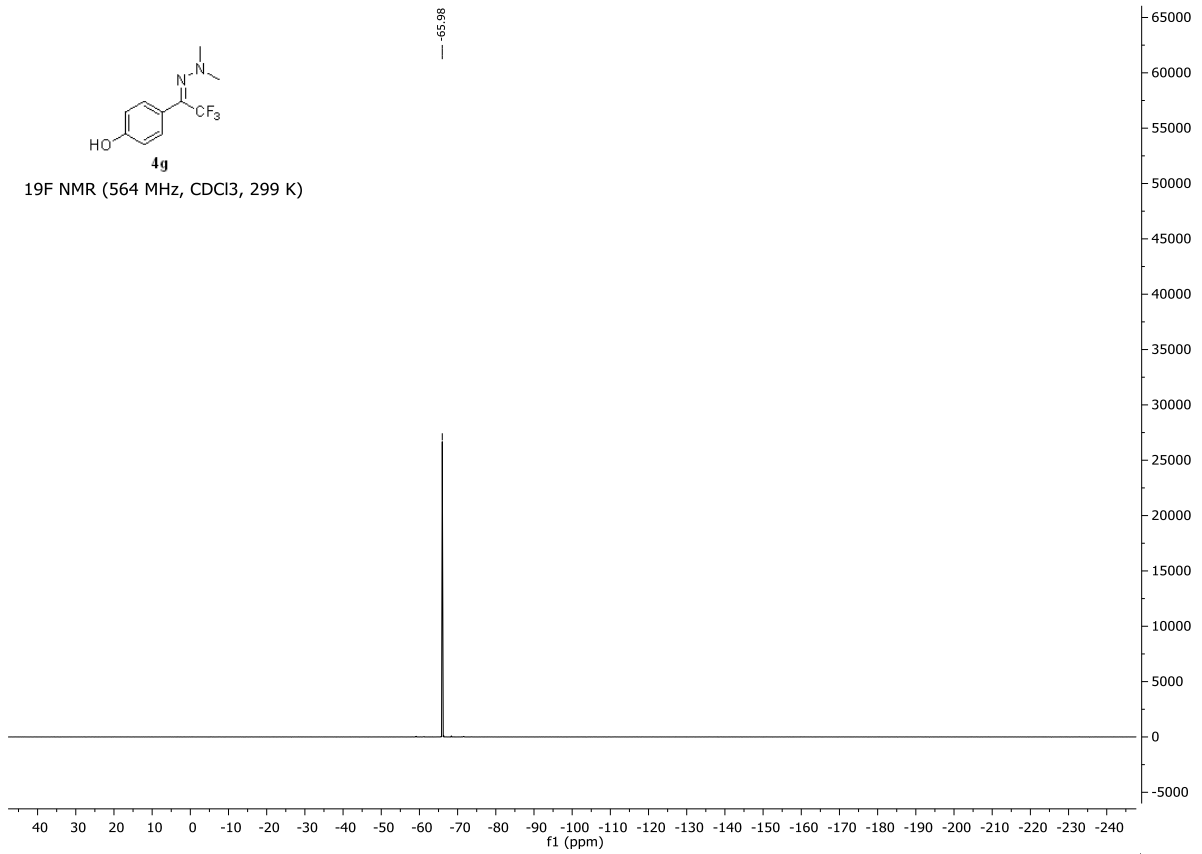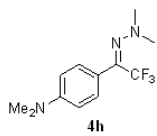

1H NMR (600 MHz, CDCl<sub>3</sub>, 299 K)

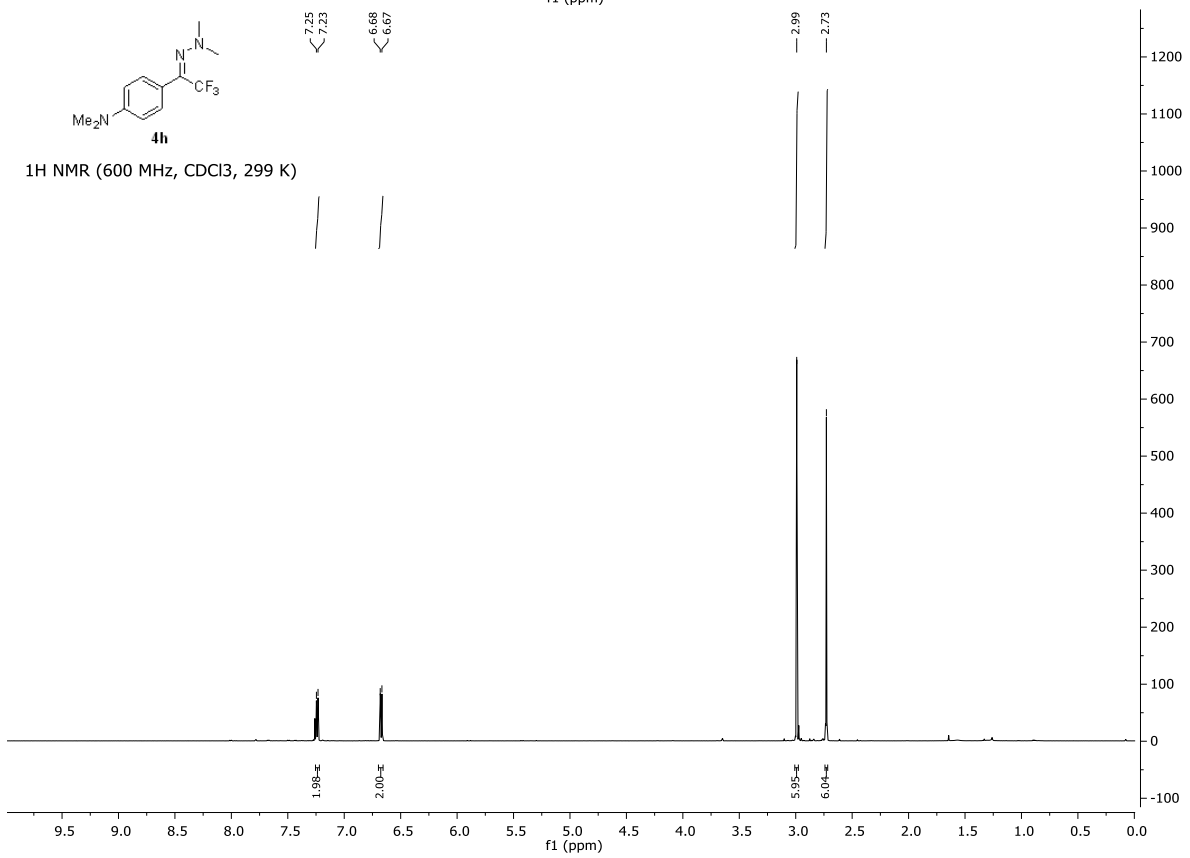

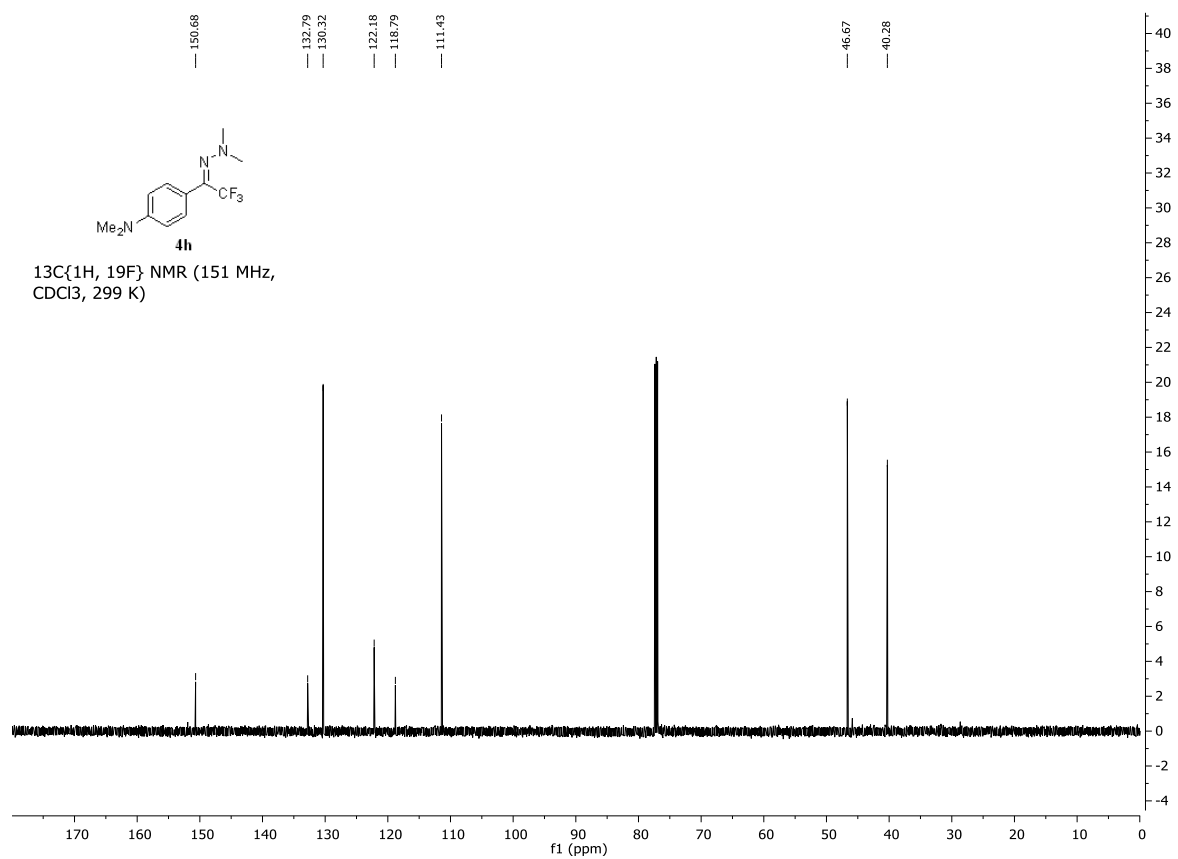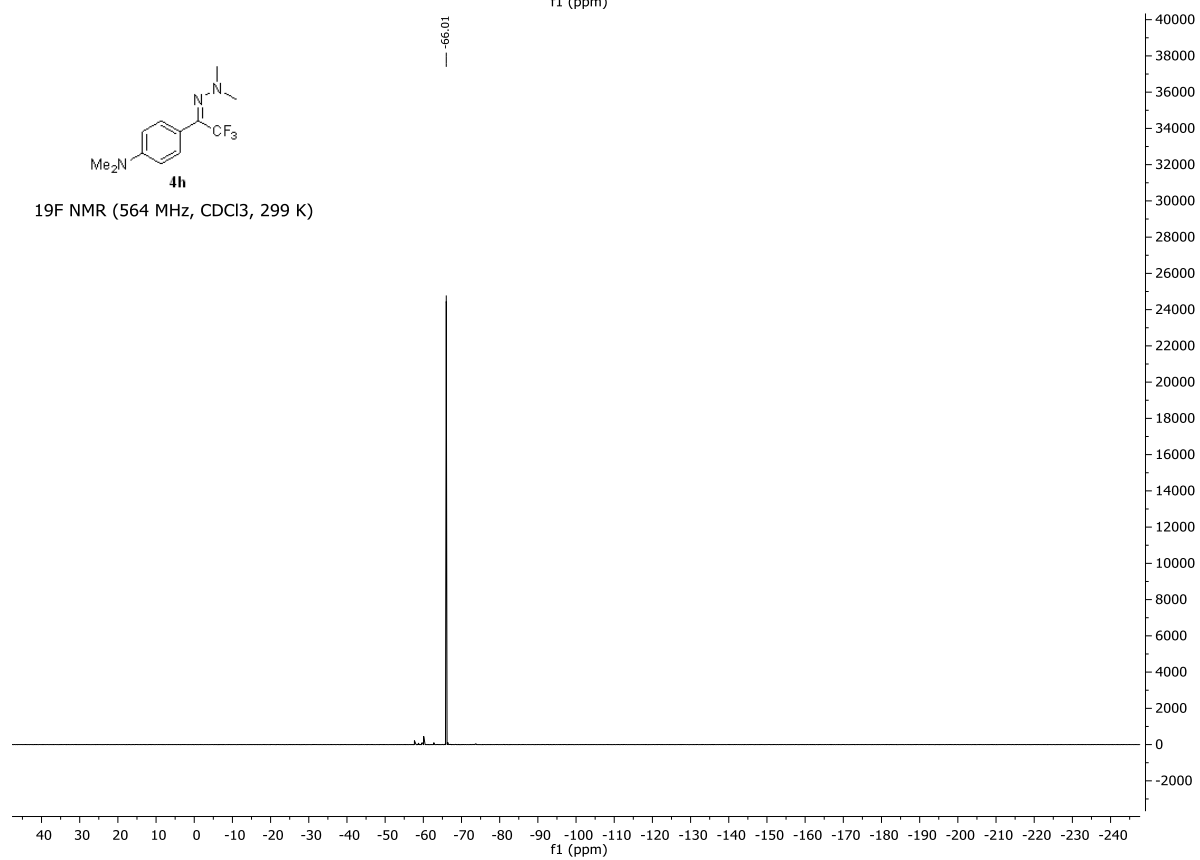

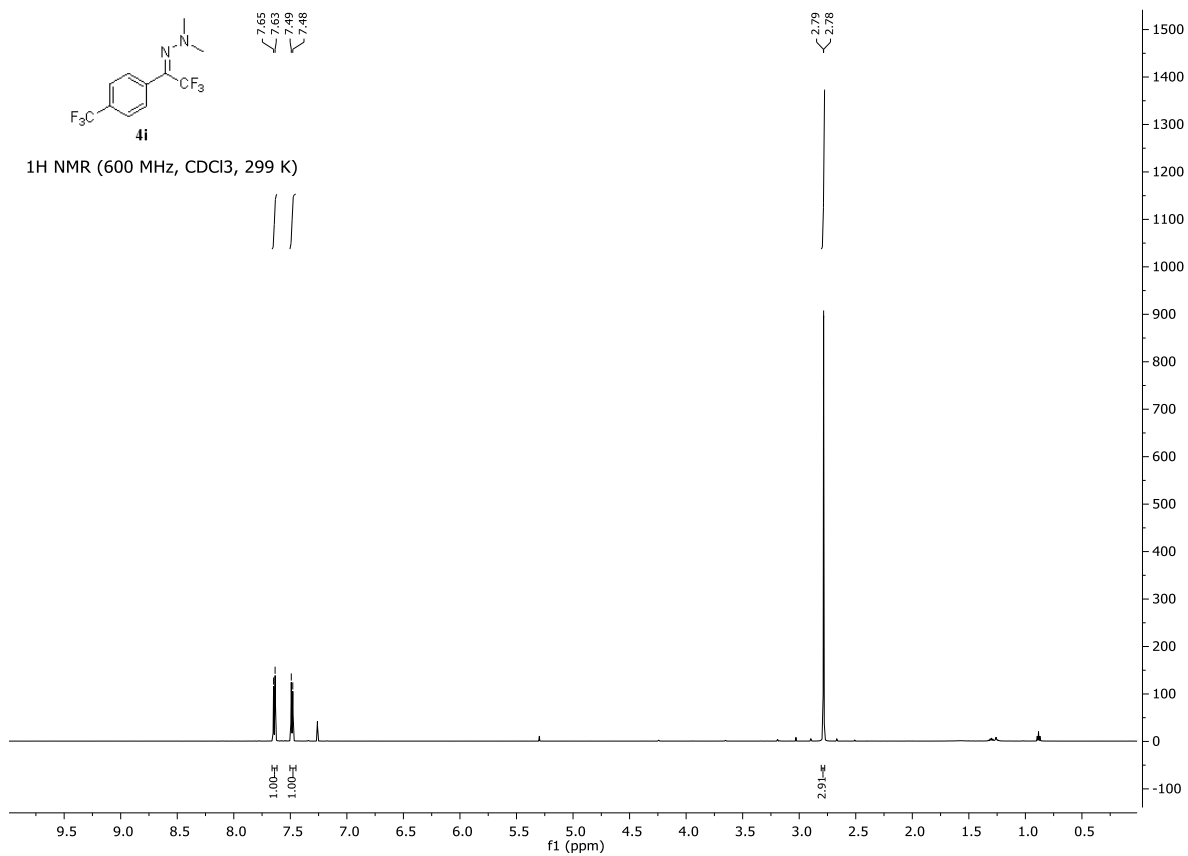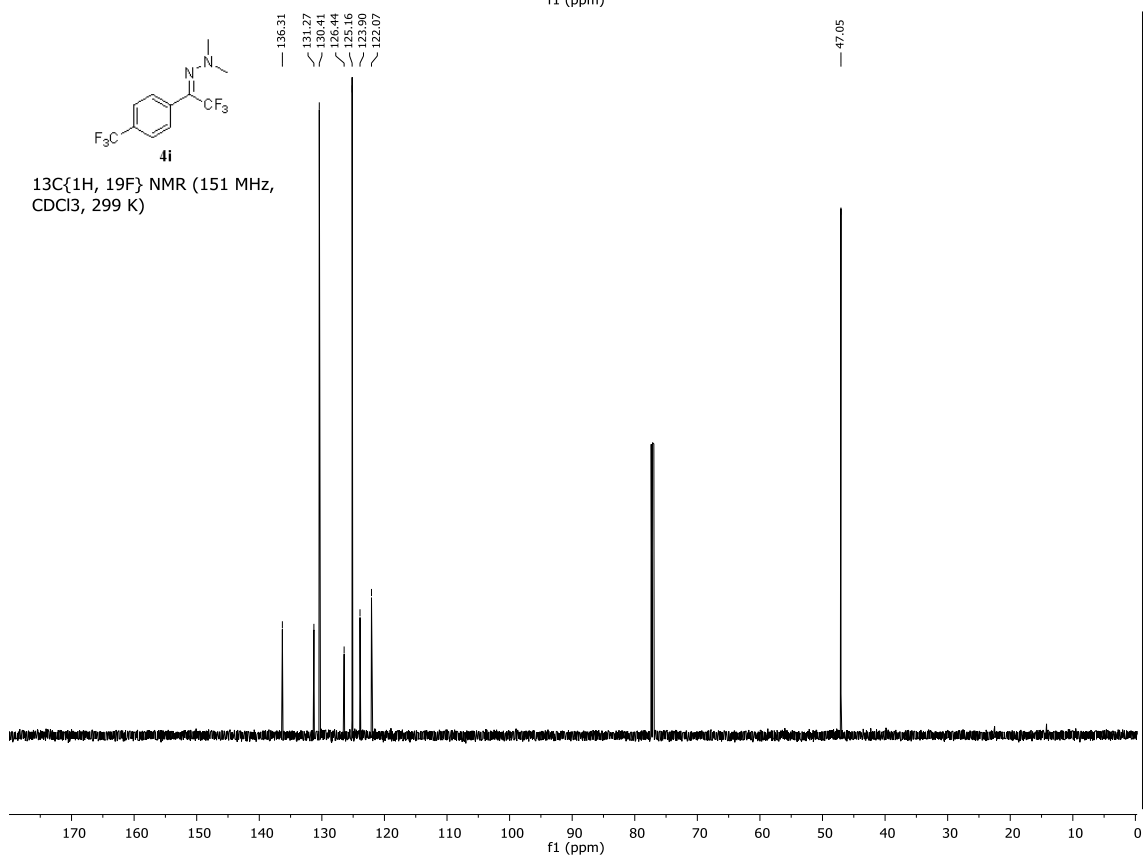

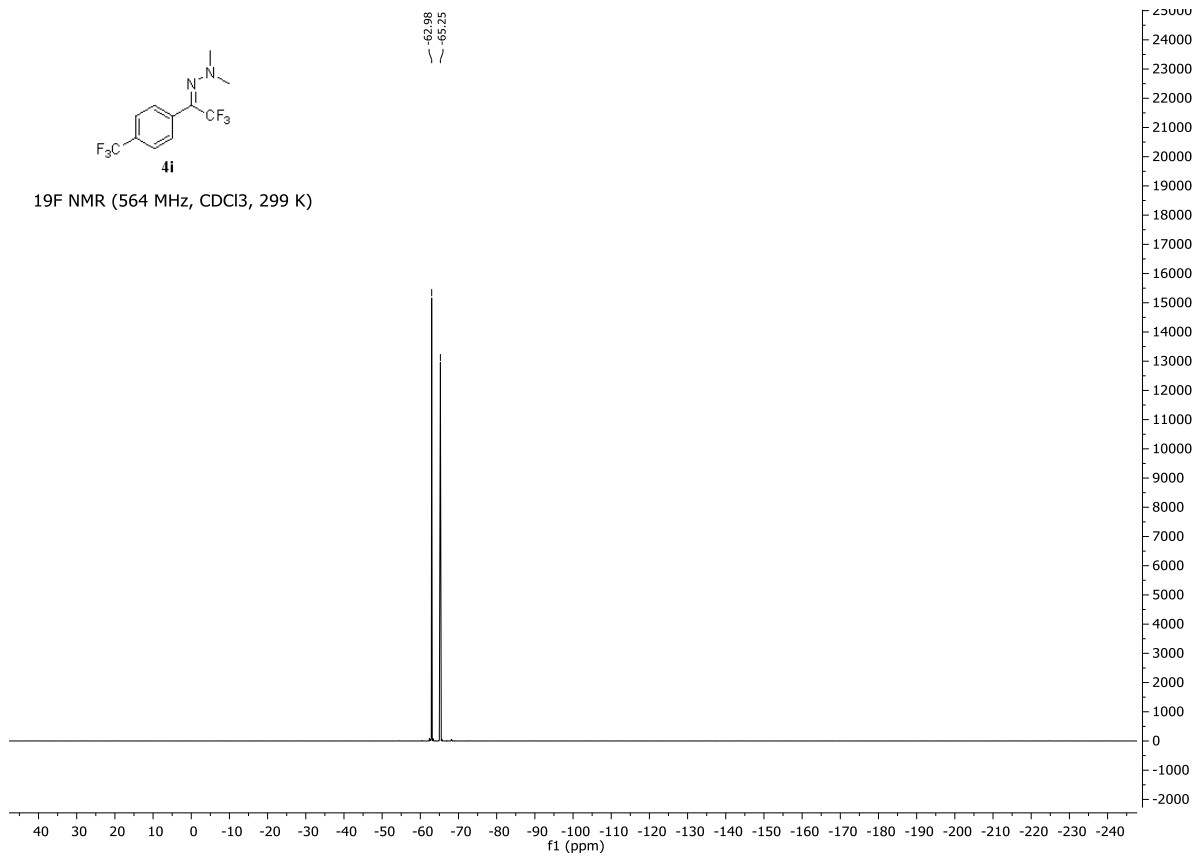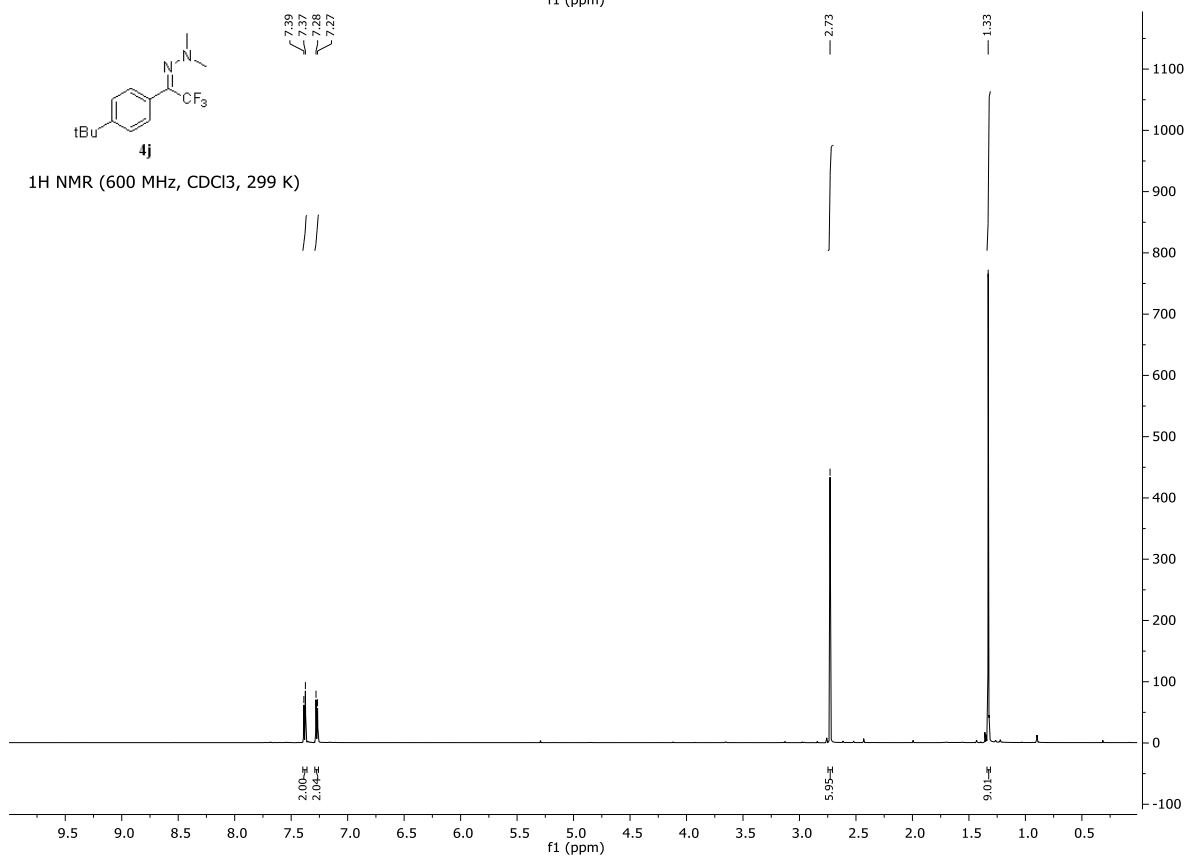



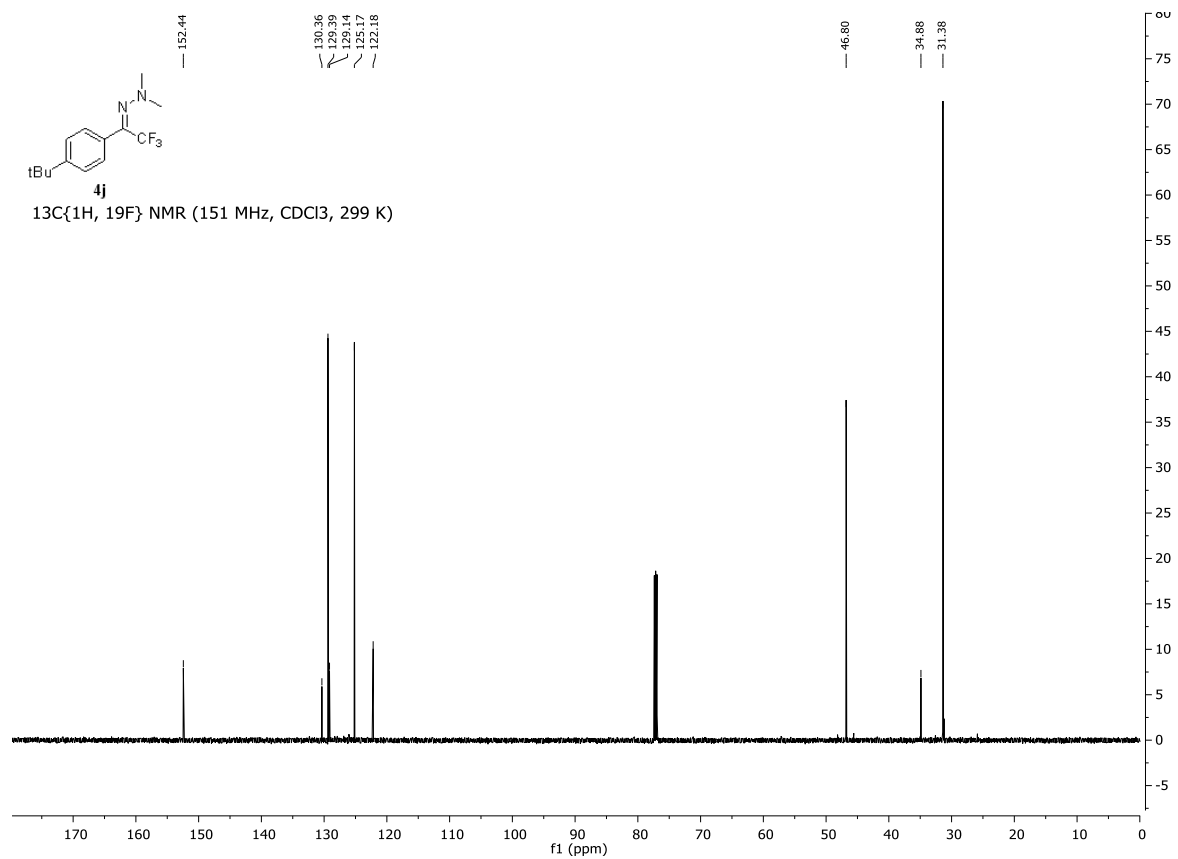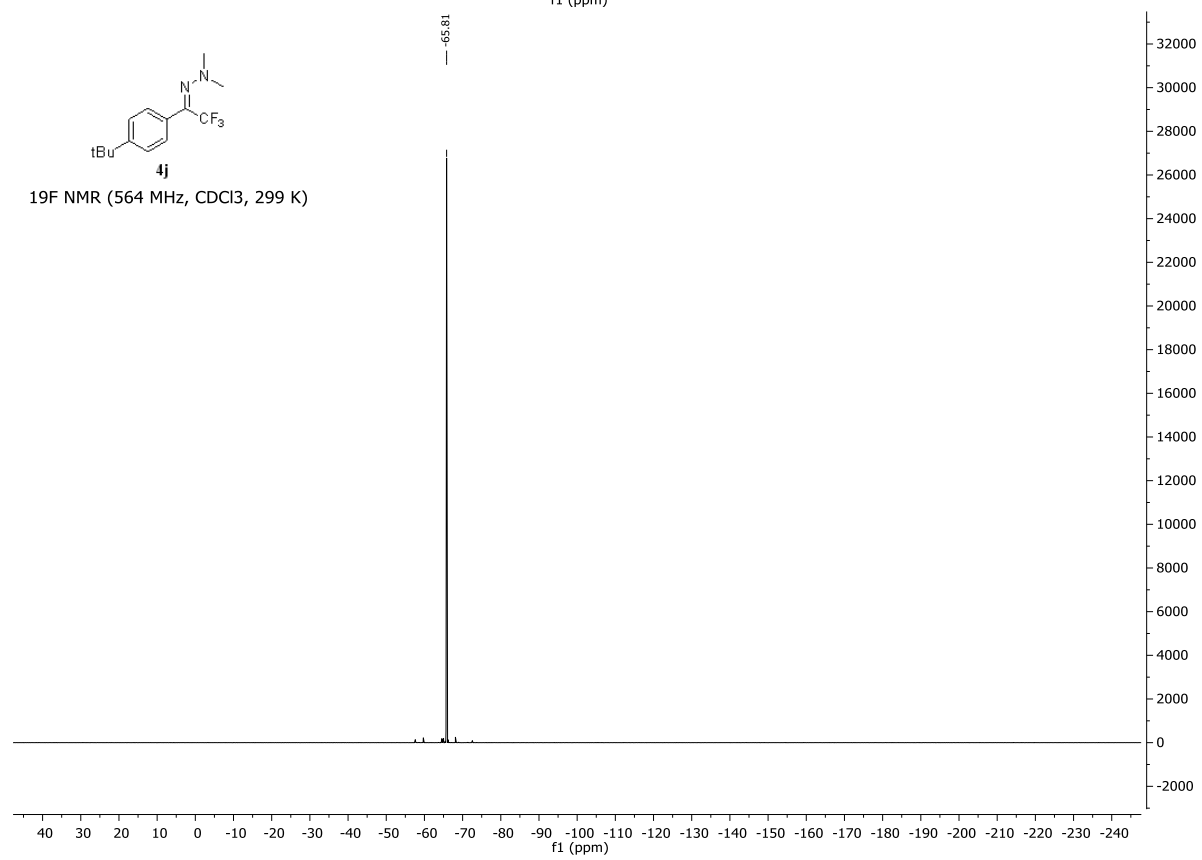

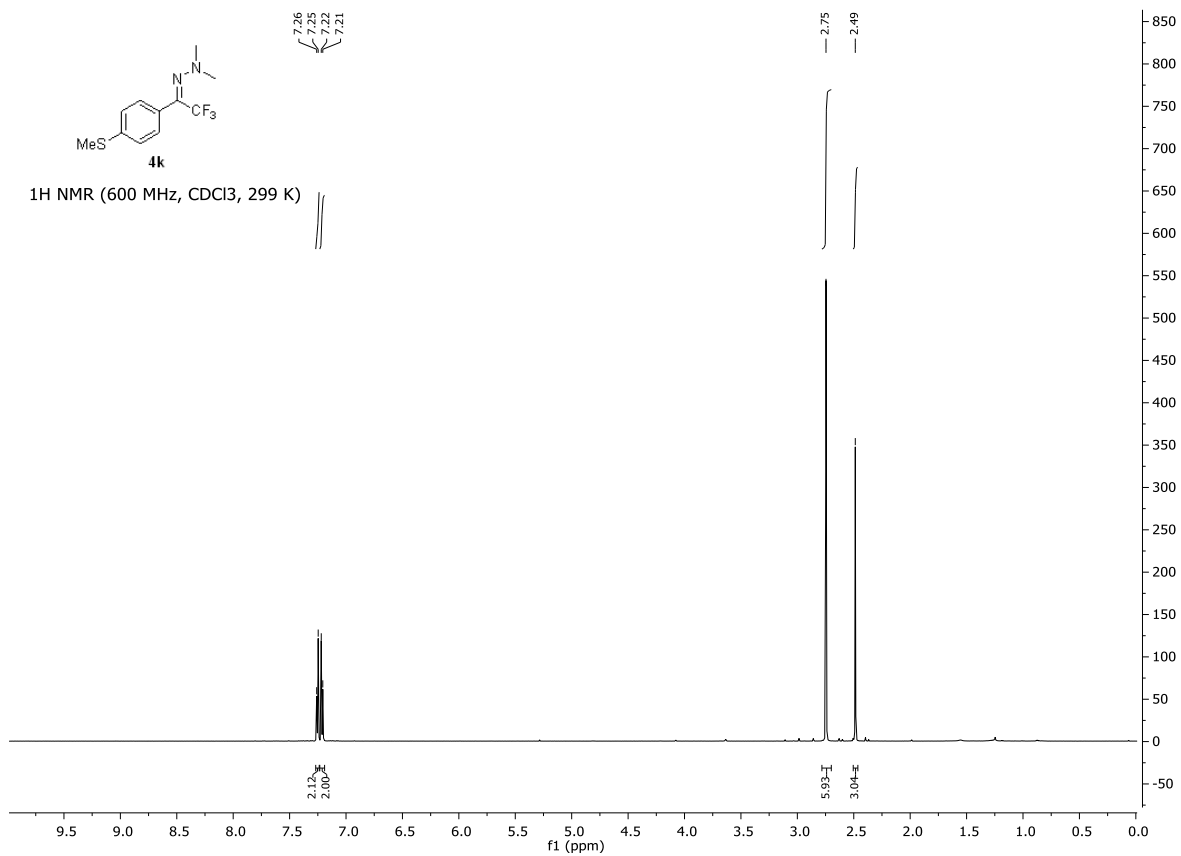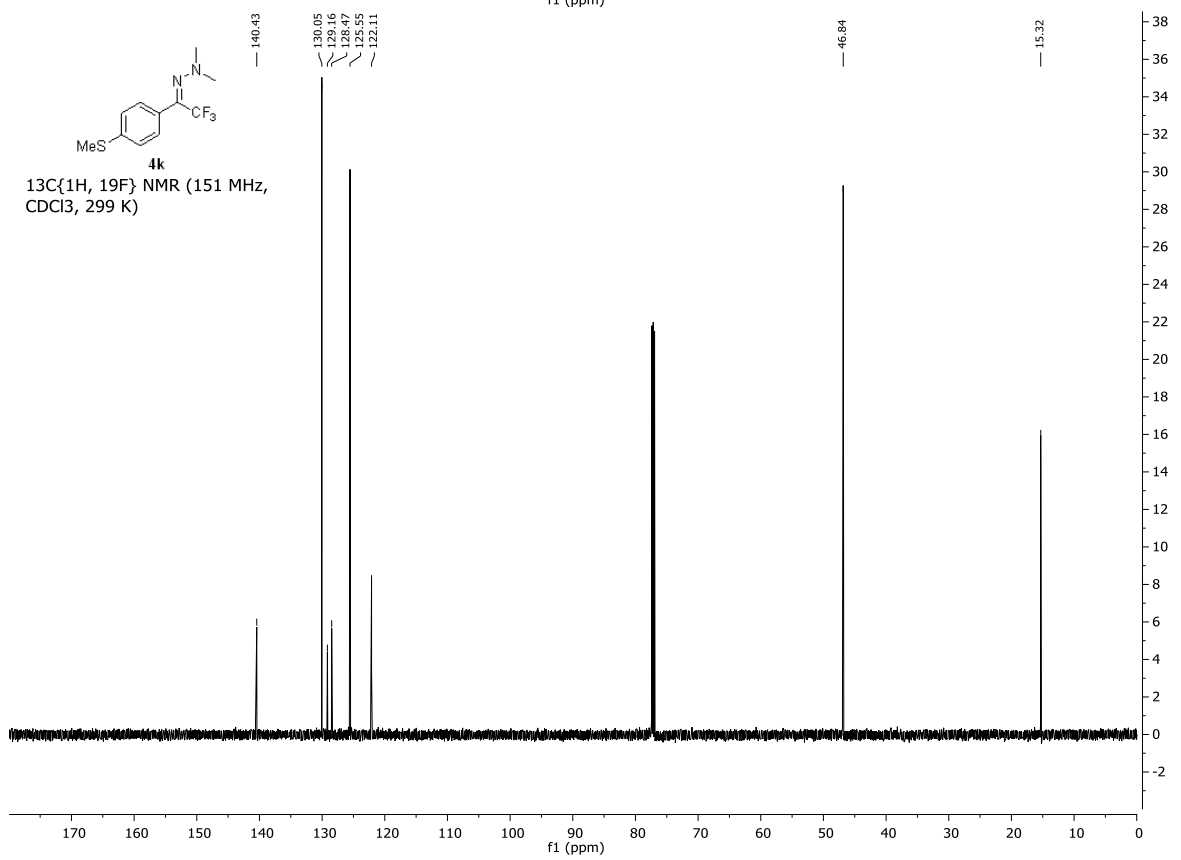

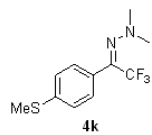

<sup>19</sup>F NMR (564 MHz, CDCl<sub>3</sub>, 299 K)

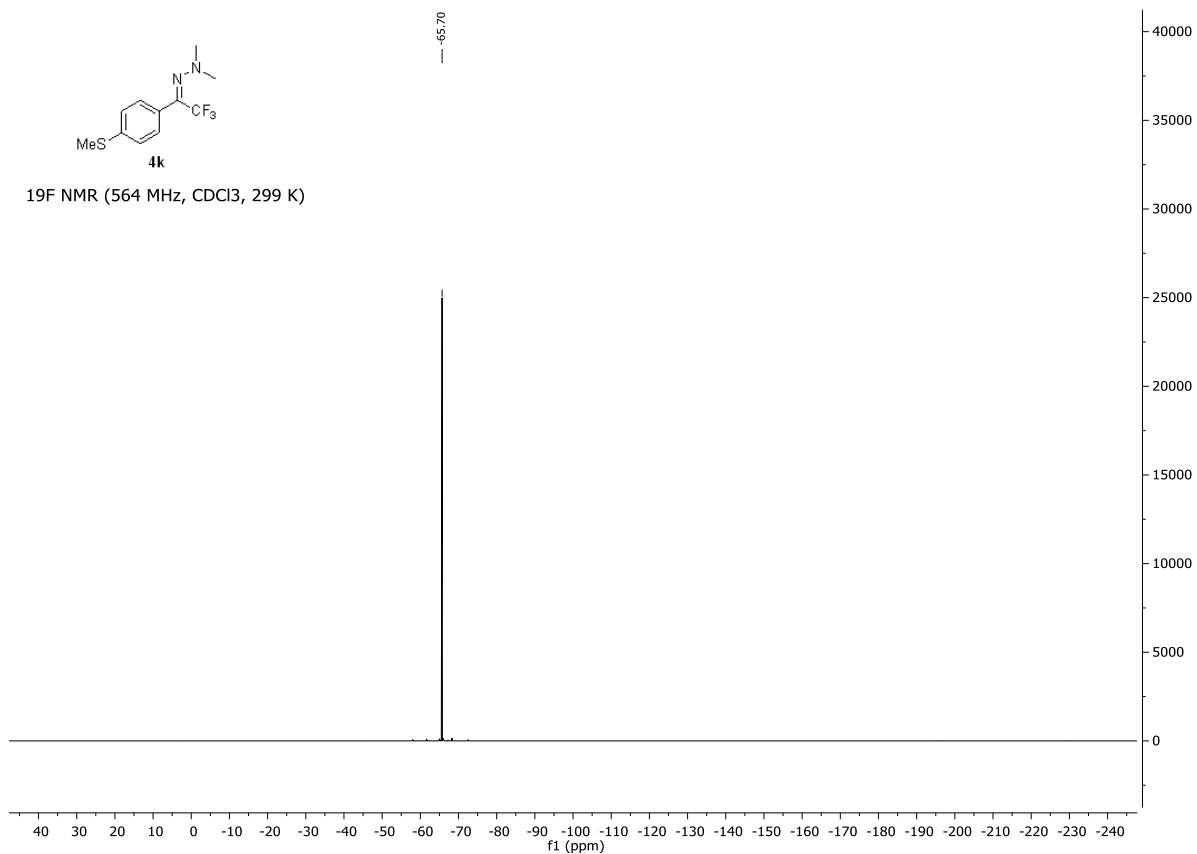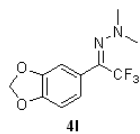

<sup>1</sup>H NMR (600 MHz, CDCl<sub>3</sub>, 299 K)

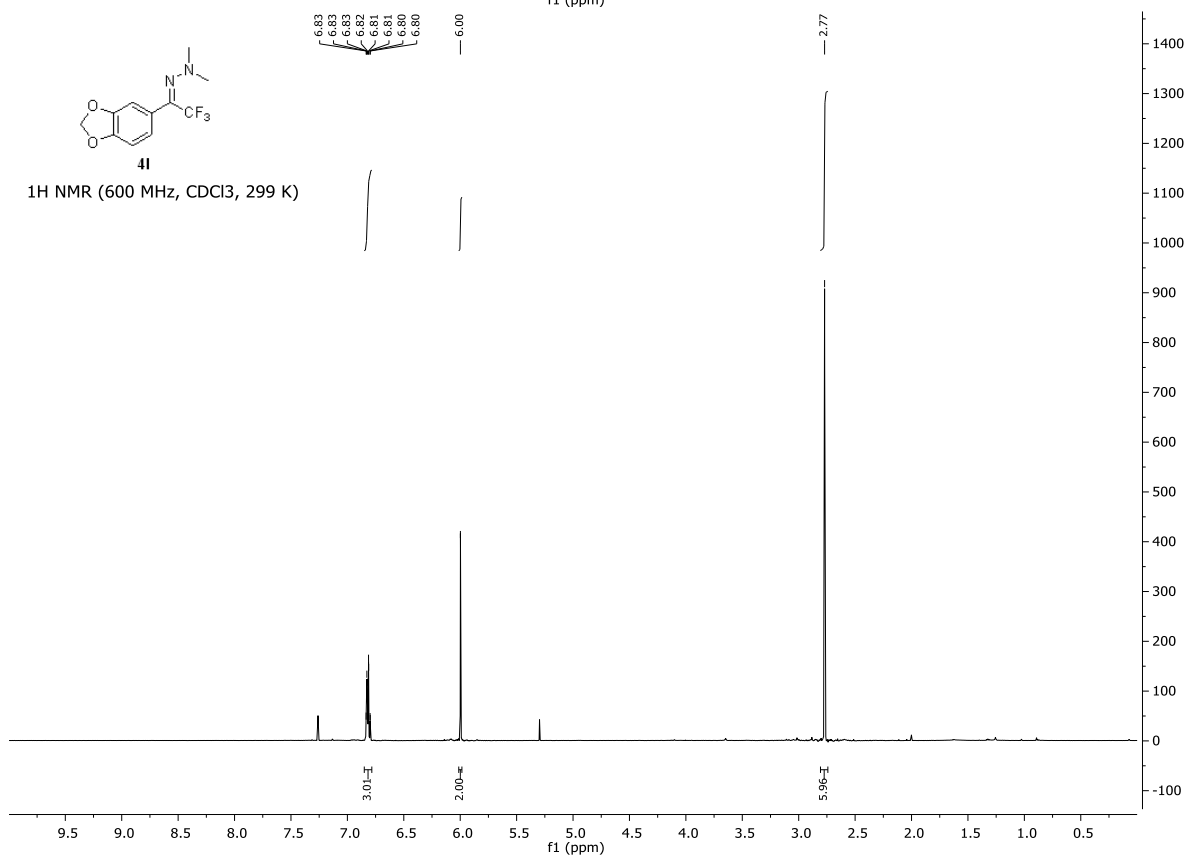

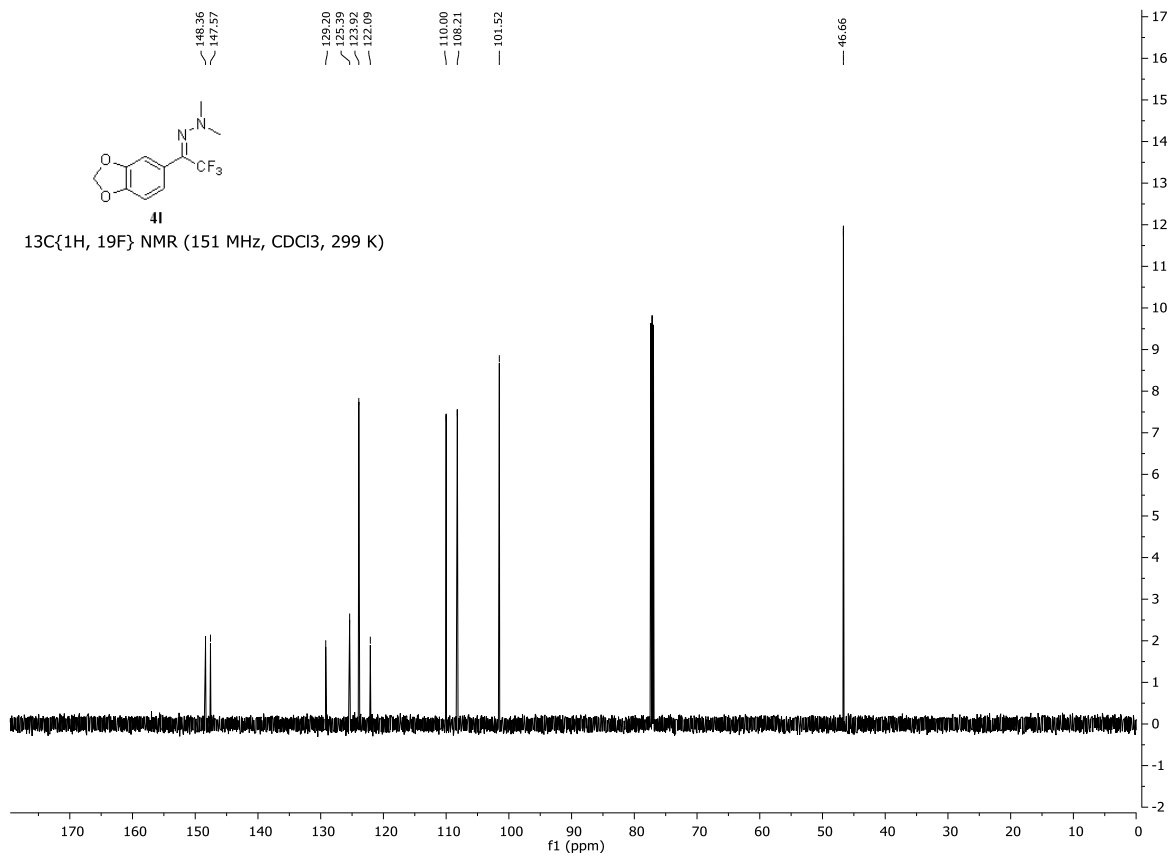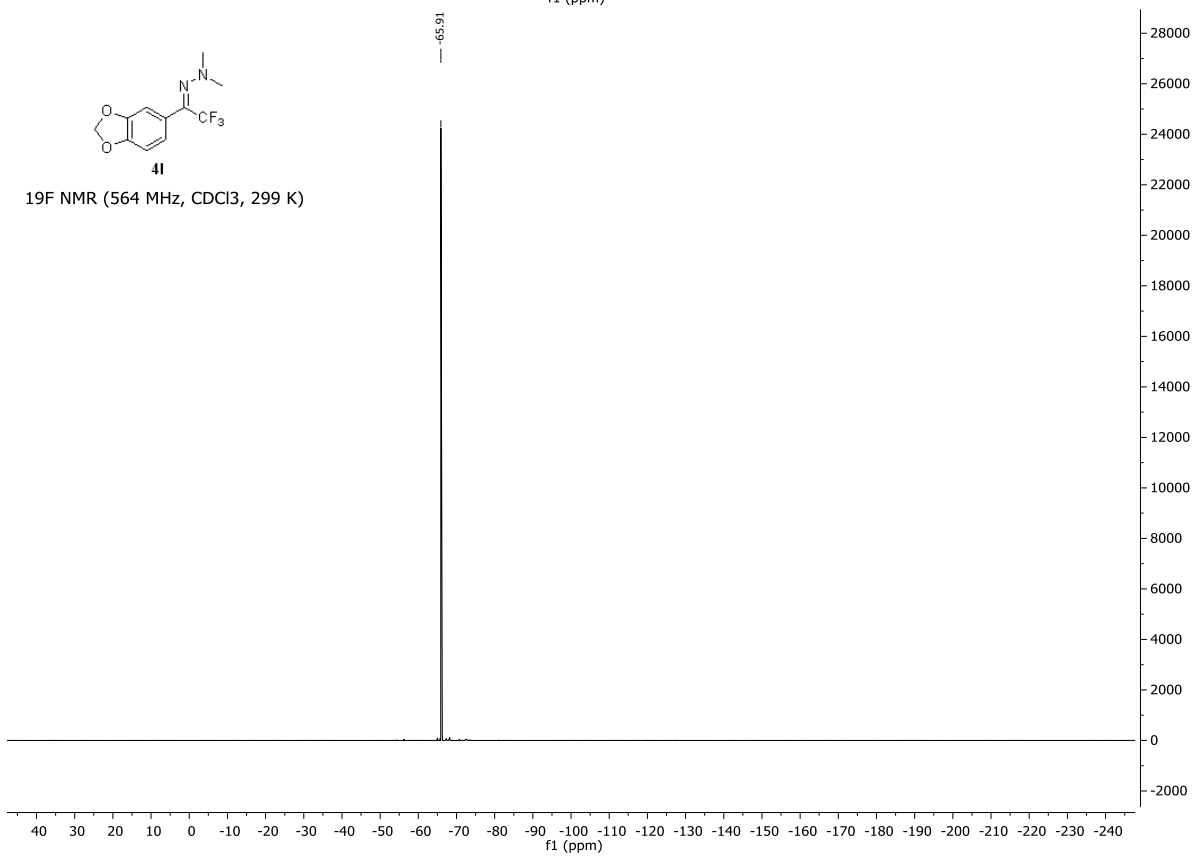

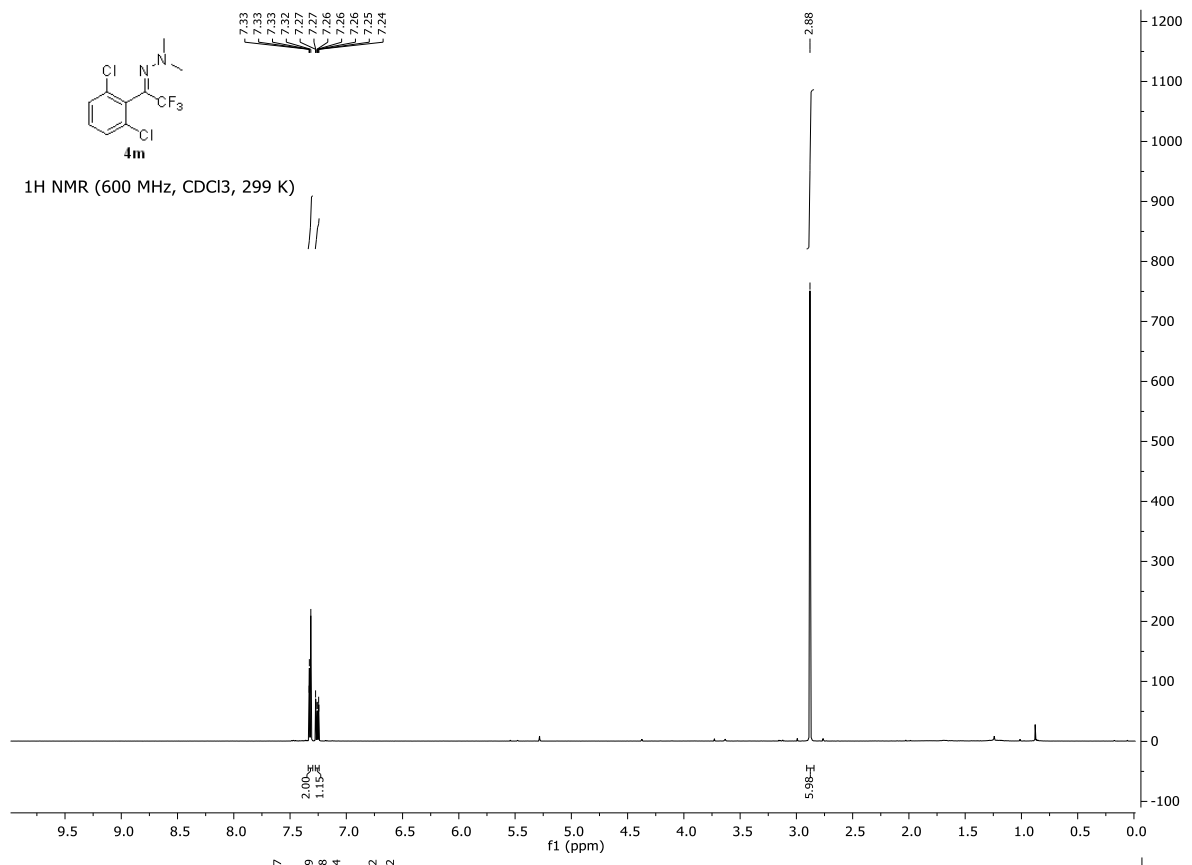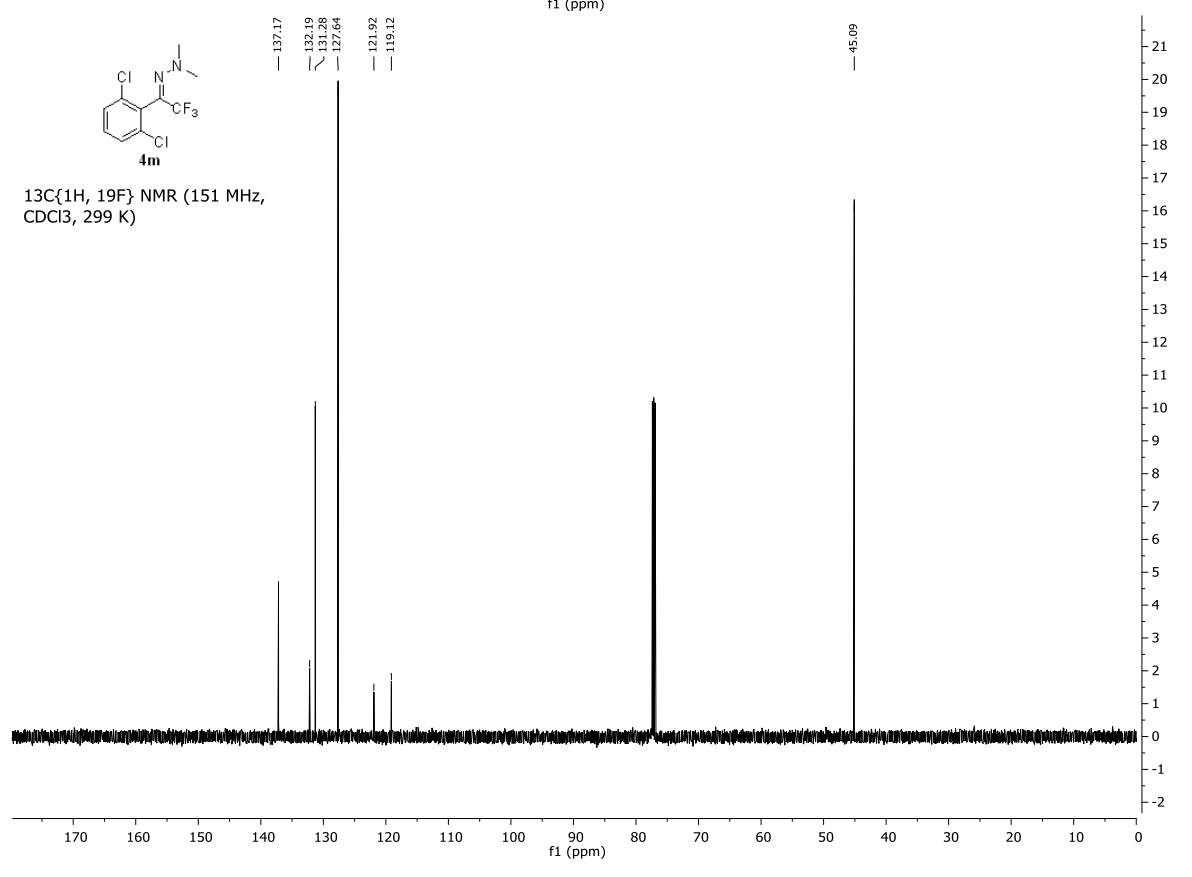

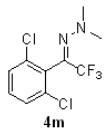

4m  
19F NMR (564 MHz, CDCl<sub>3</sub>, 299 K)

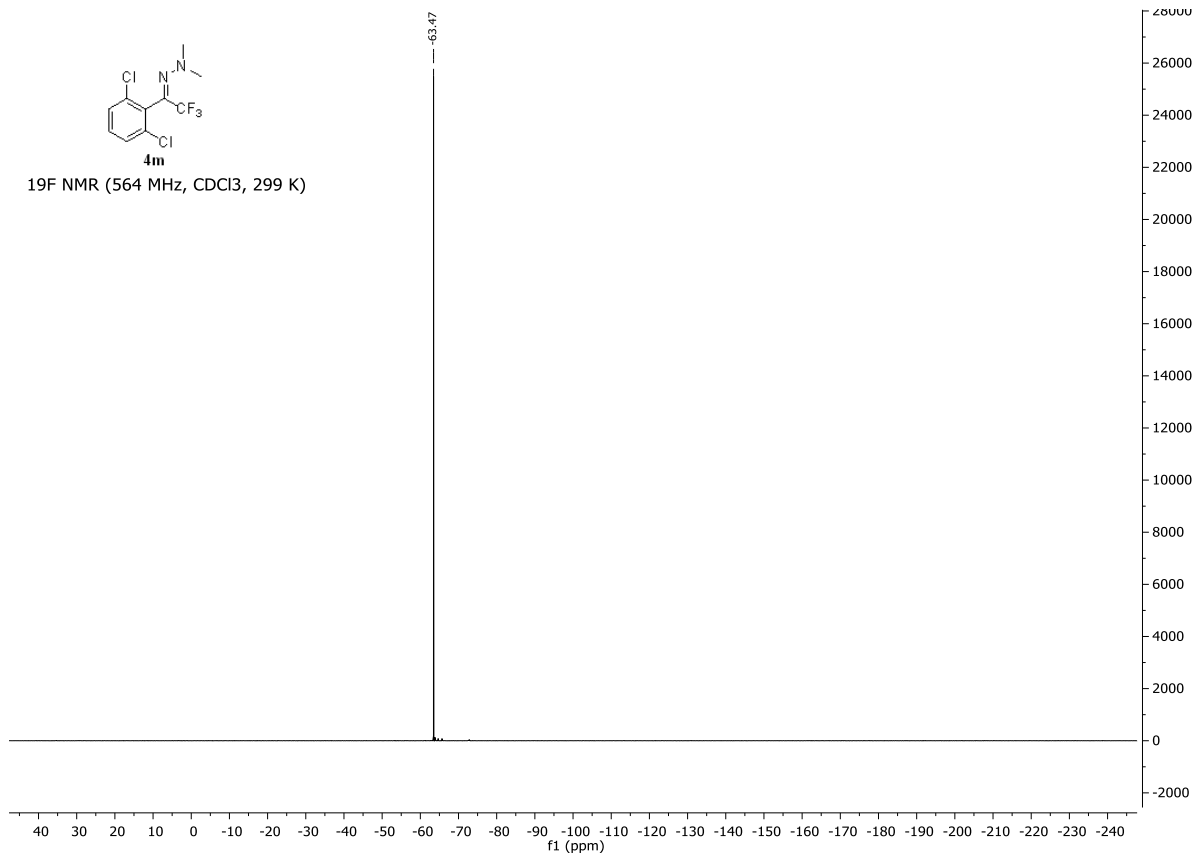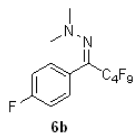

6b  
1H NMR (600 MHz, CDCl<sub>3</sub>, 299 K)

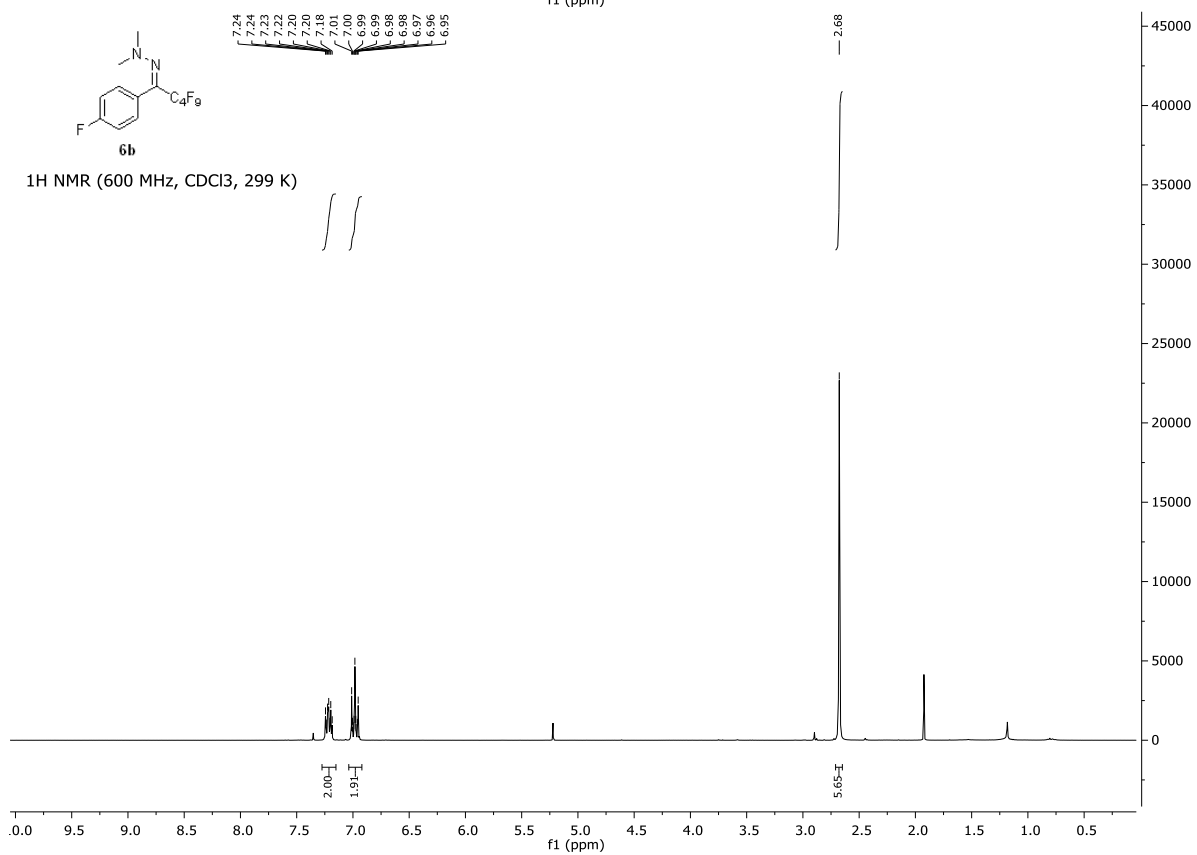

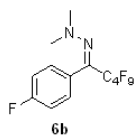

<sup>19</sup>F NMR (564 MHz, CDCl<sub>3</sub>, 299 K)

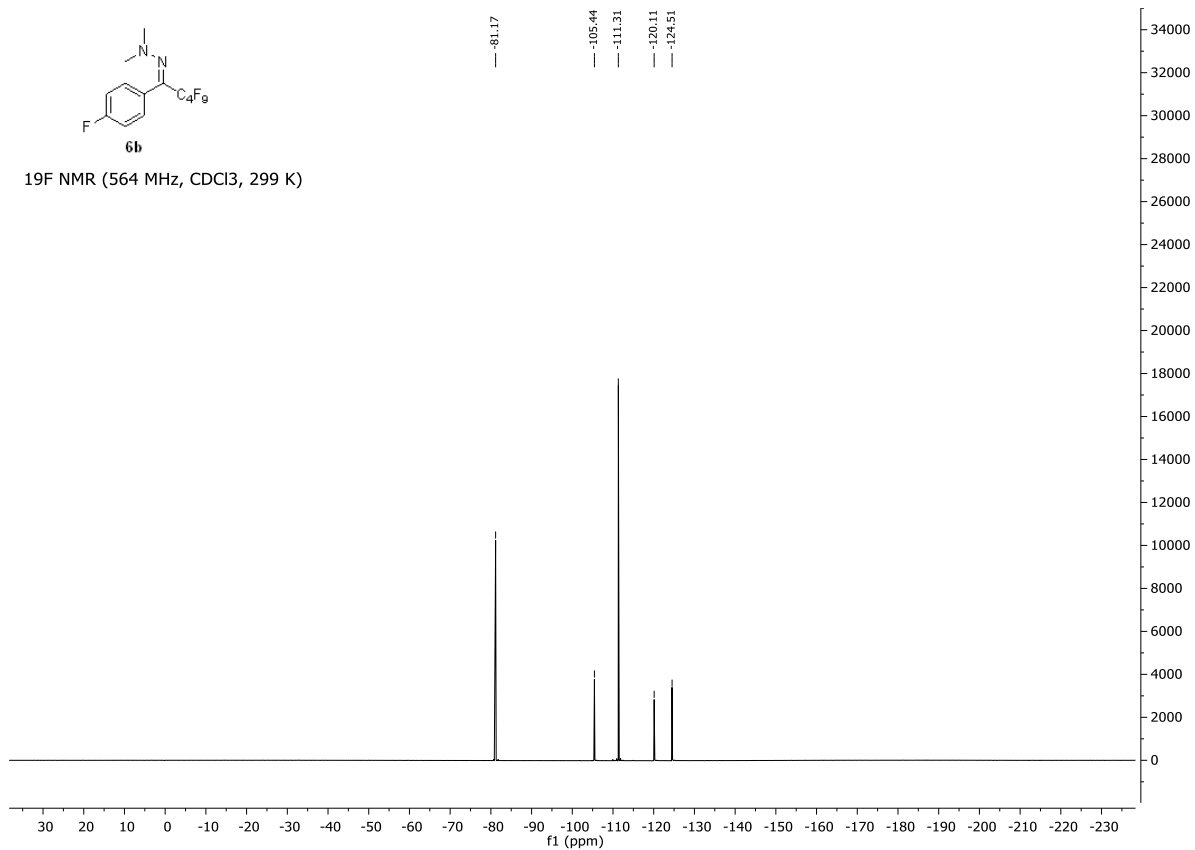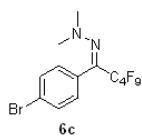

<sup>1</sup>H NMR (600 MHz, CDCl<sub>3</sub>, 299 K)

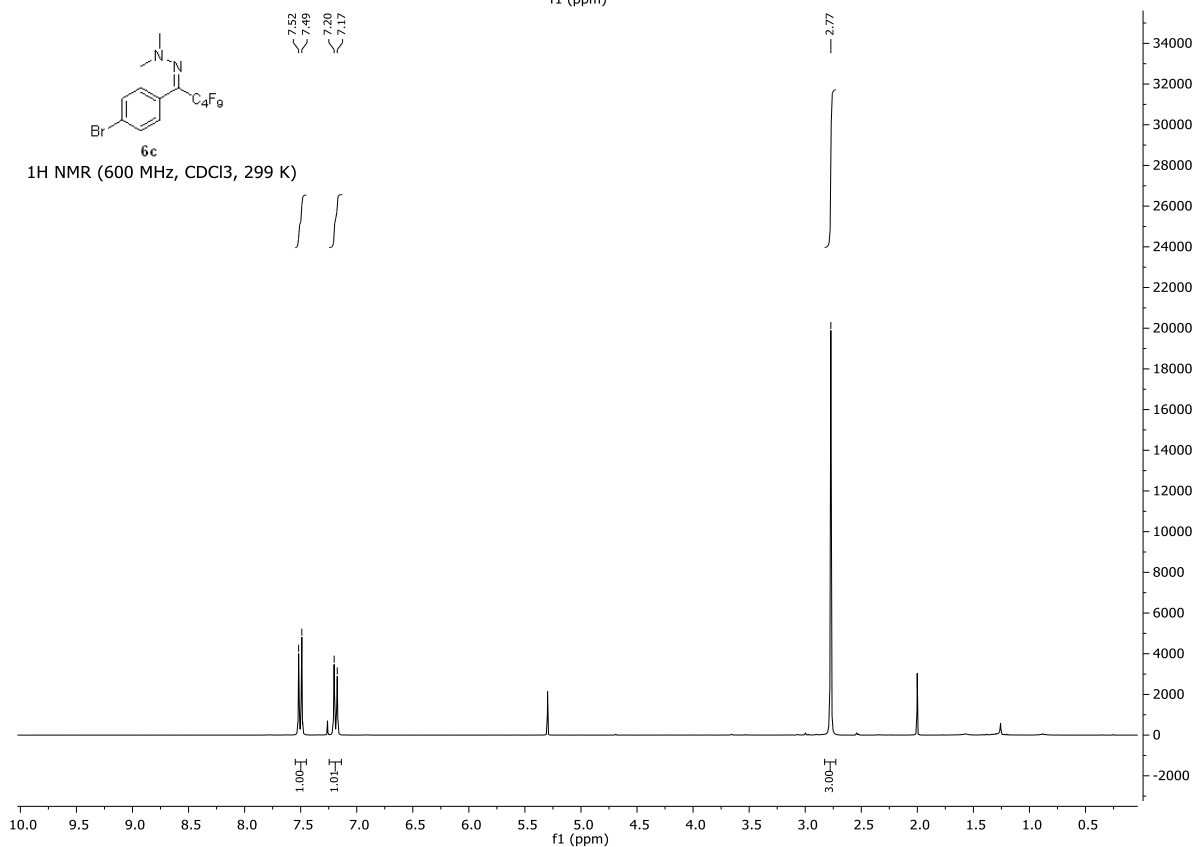

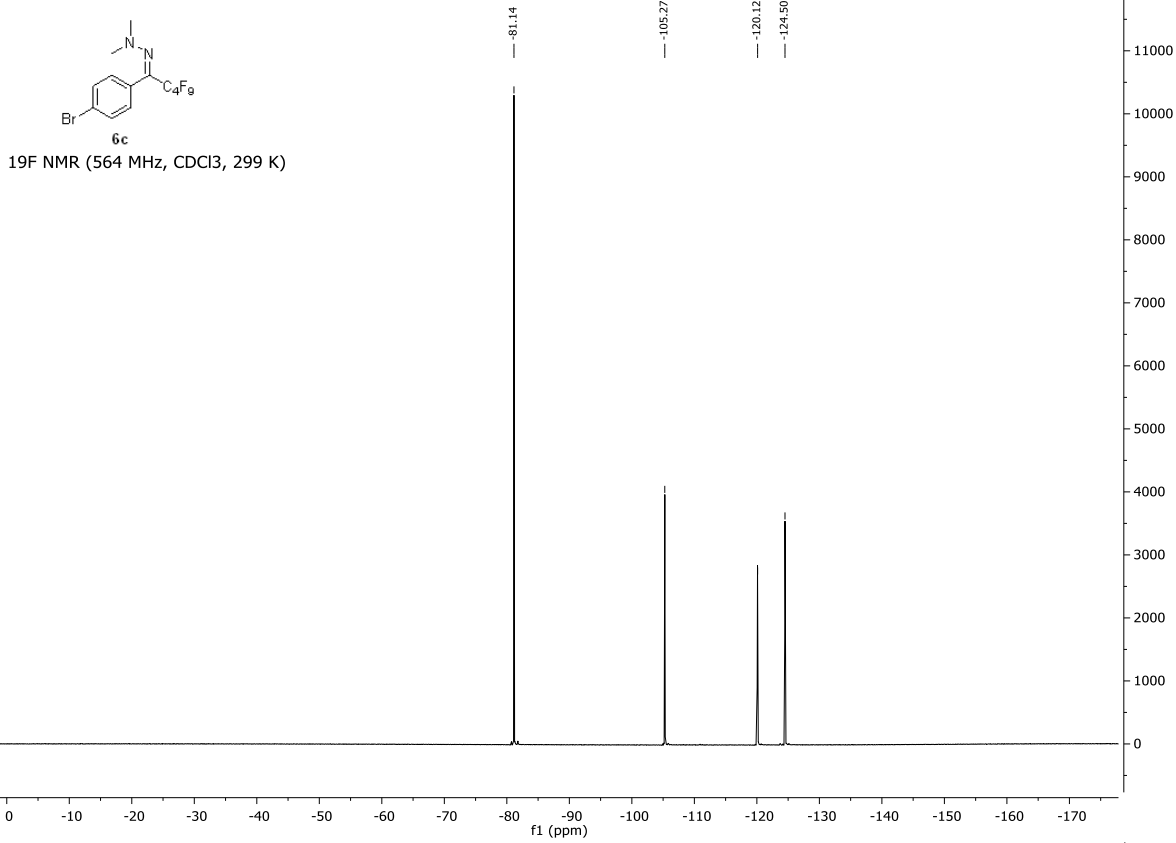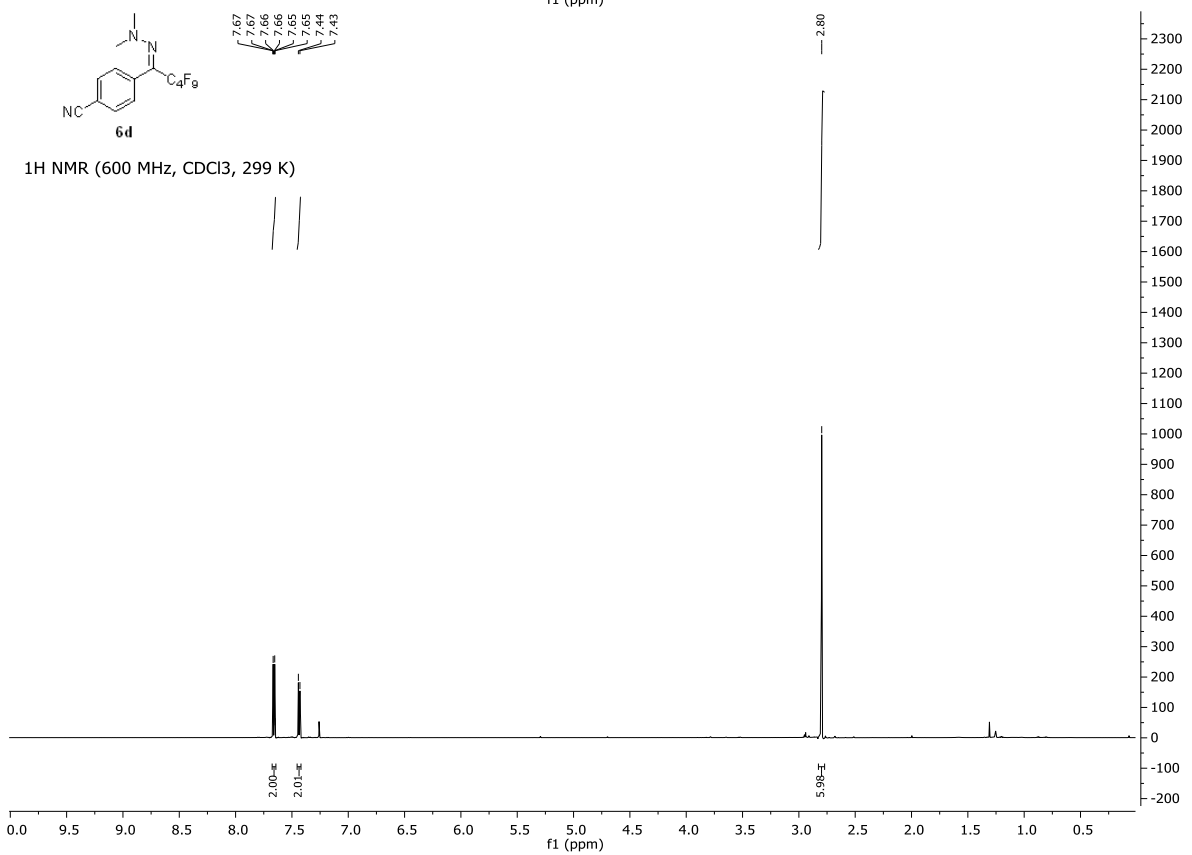



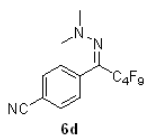

$^{13}\text{C}\{^1\text{H}, ^{19}\text{F}\}$  NMR (151 MHz,  $\text{CDCl}_3$ , 299 K)

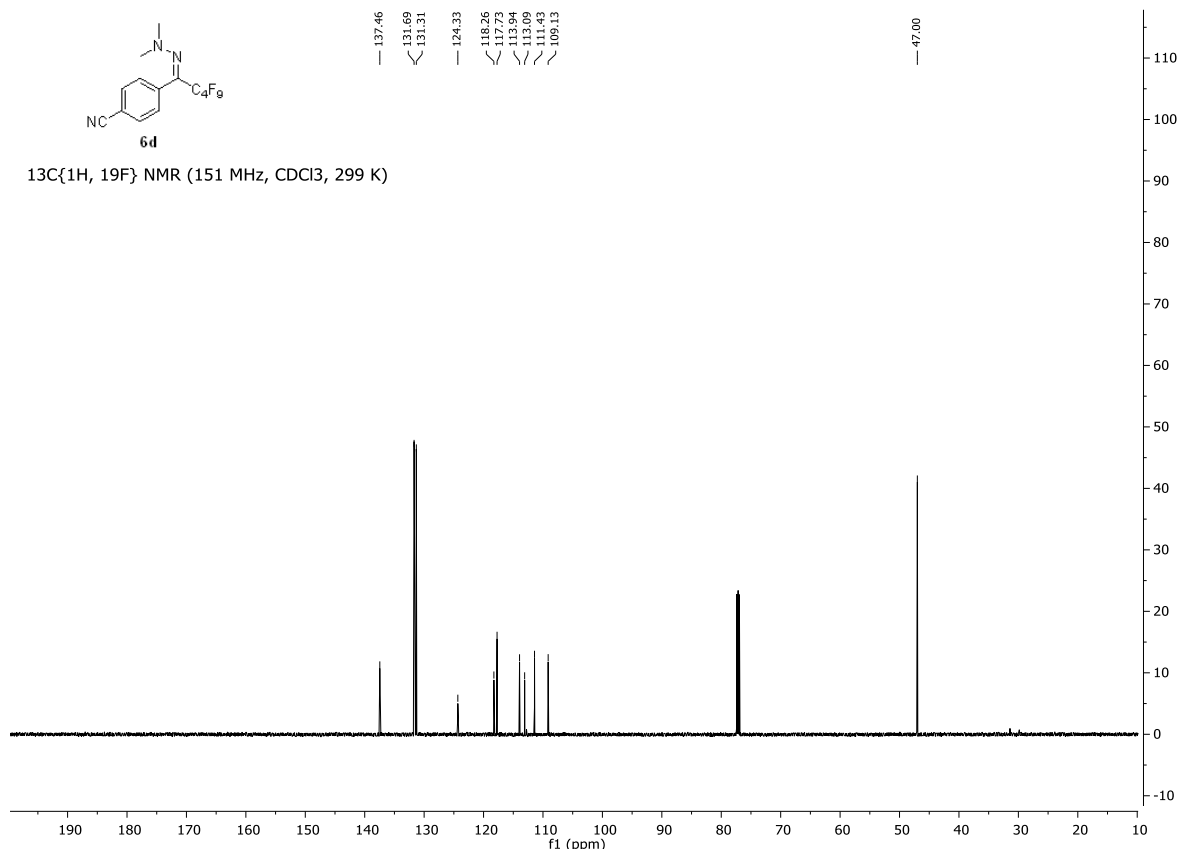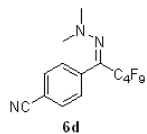

$^{19}\text{F}$  NMR (564 MHz,  $\text{CDCl}_3$ , 299 K)

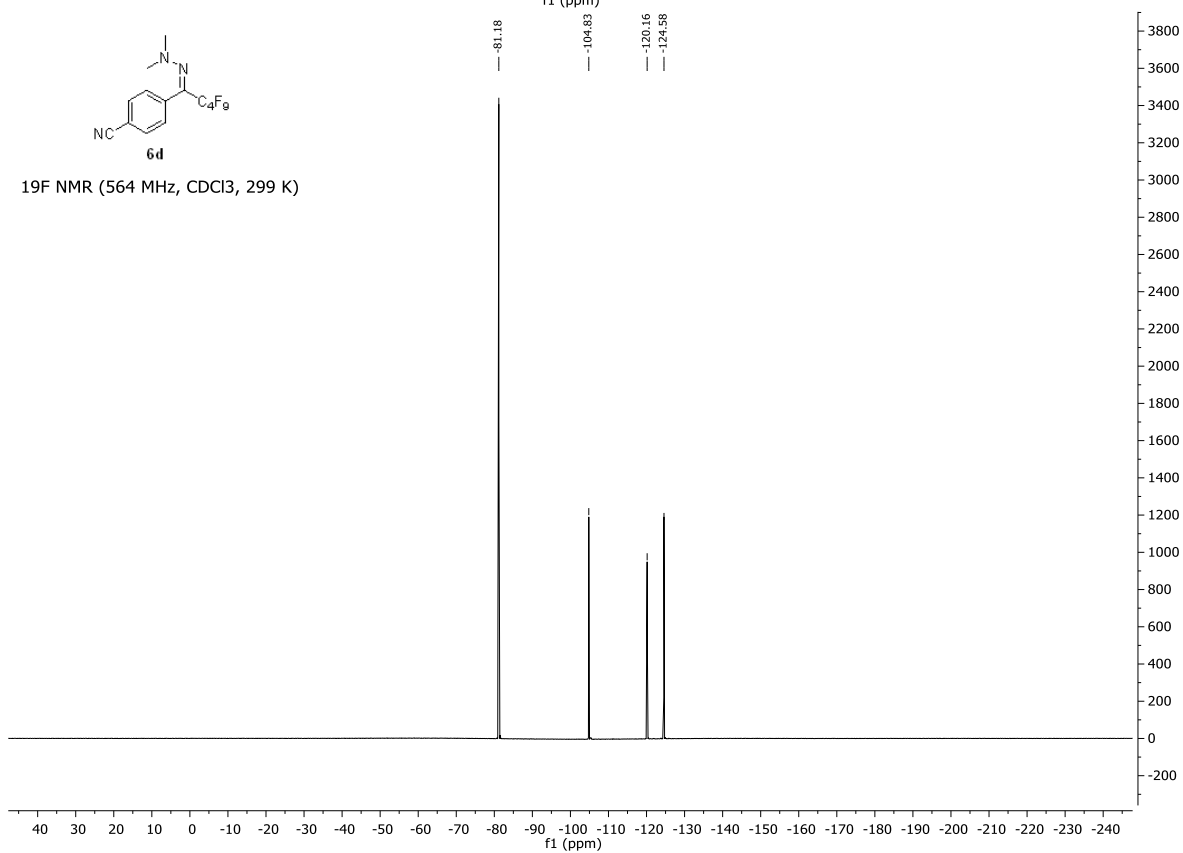

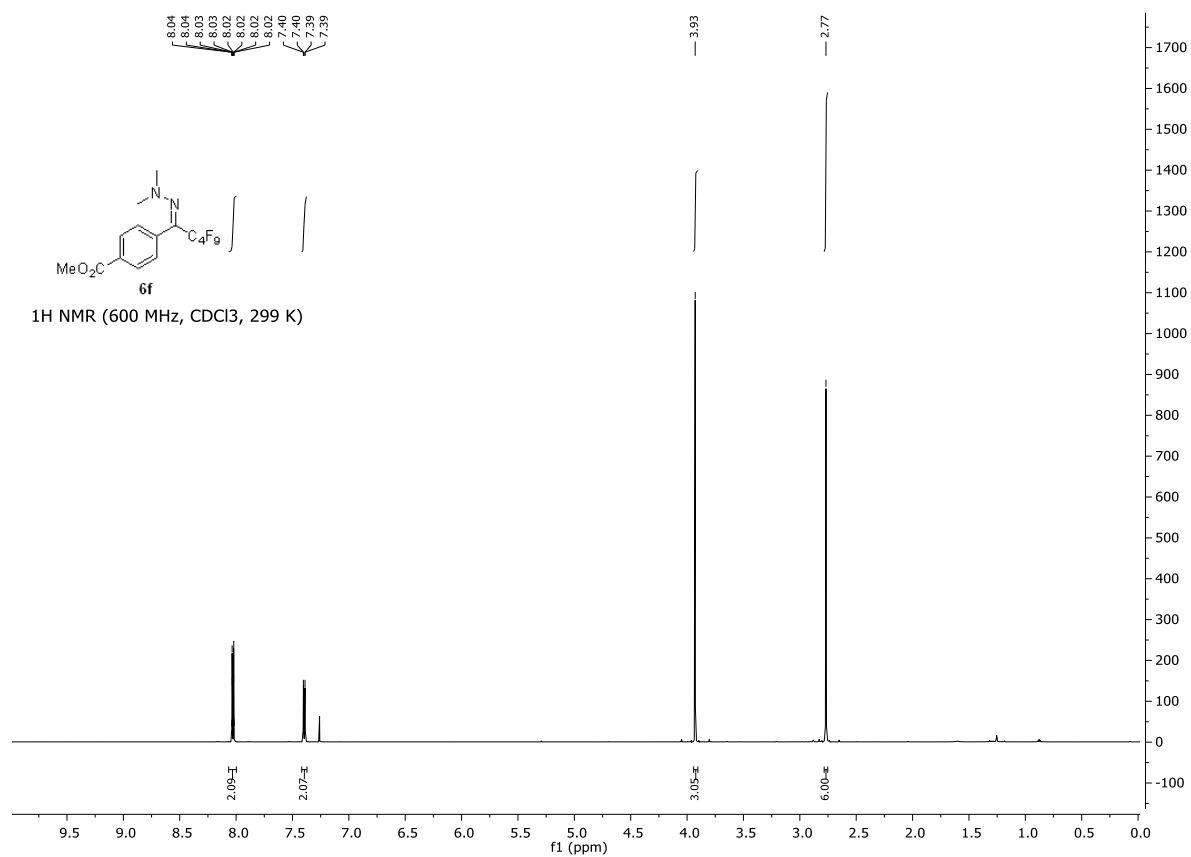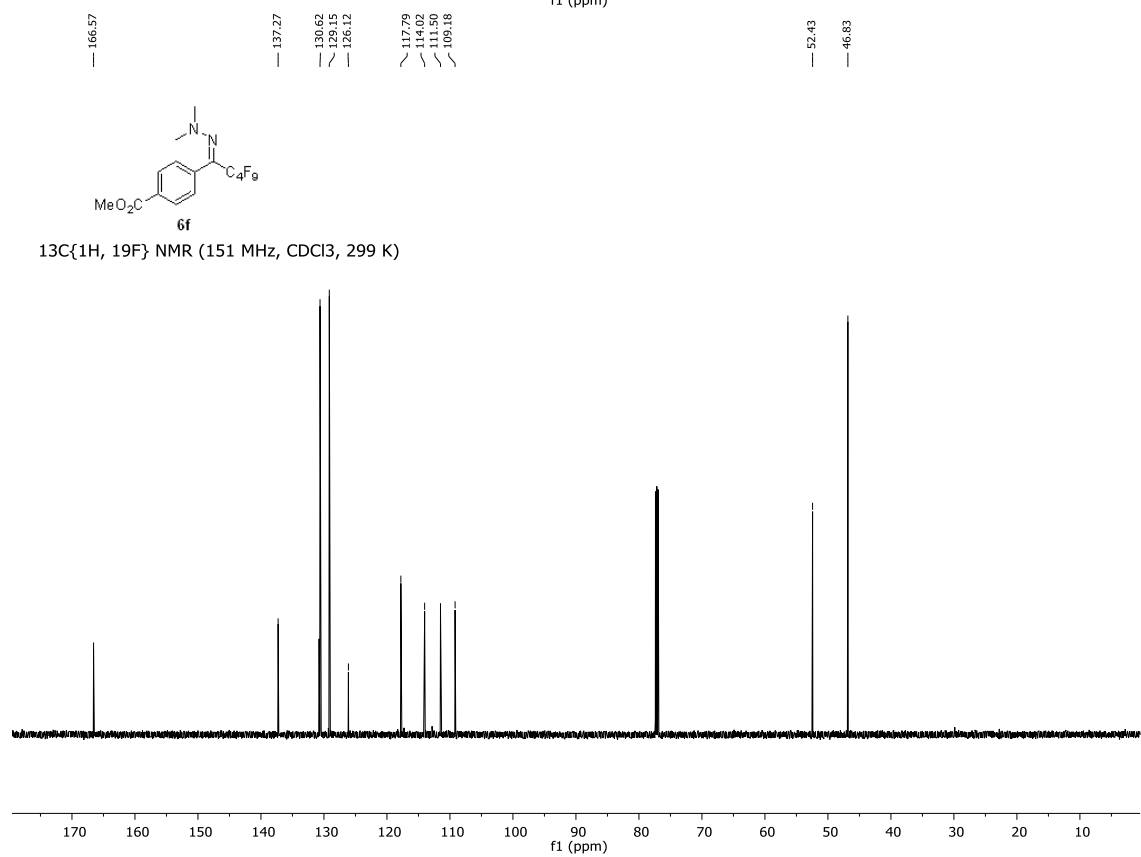

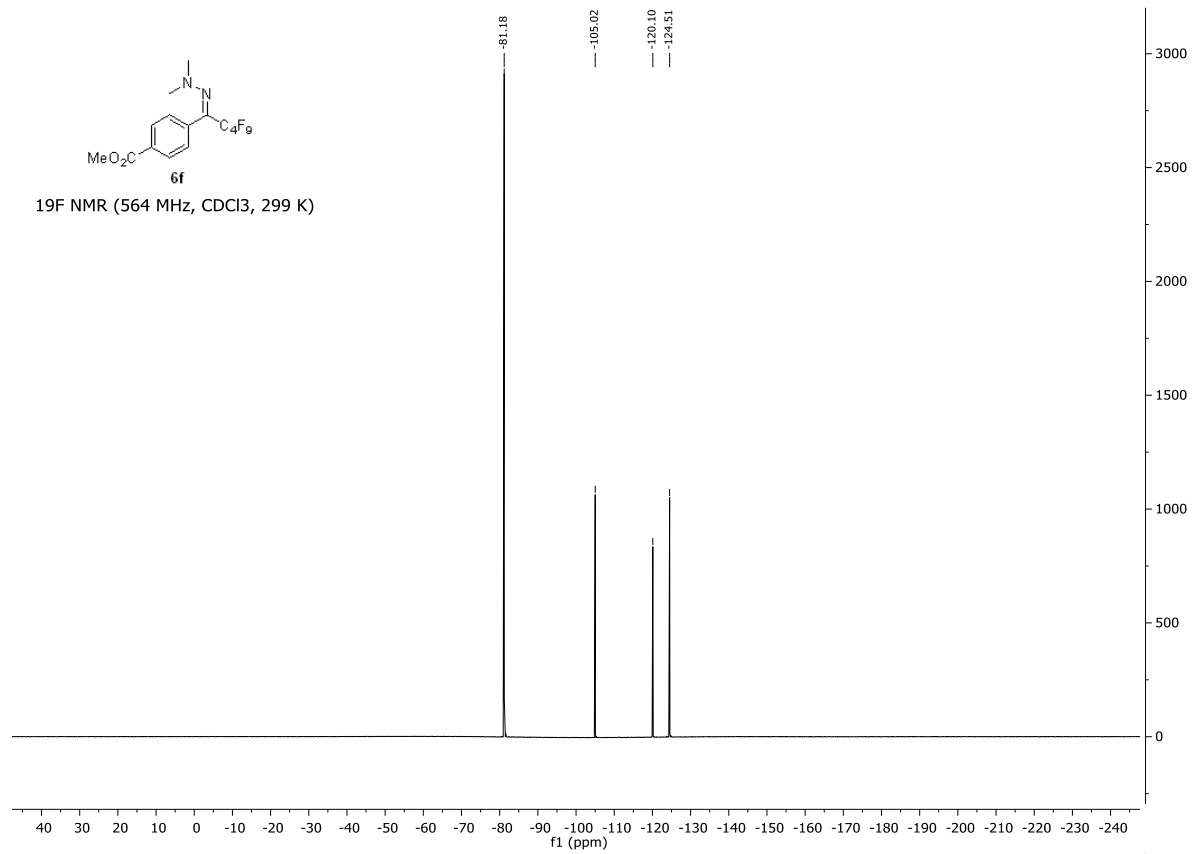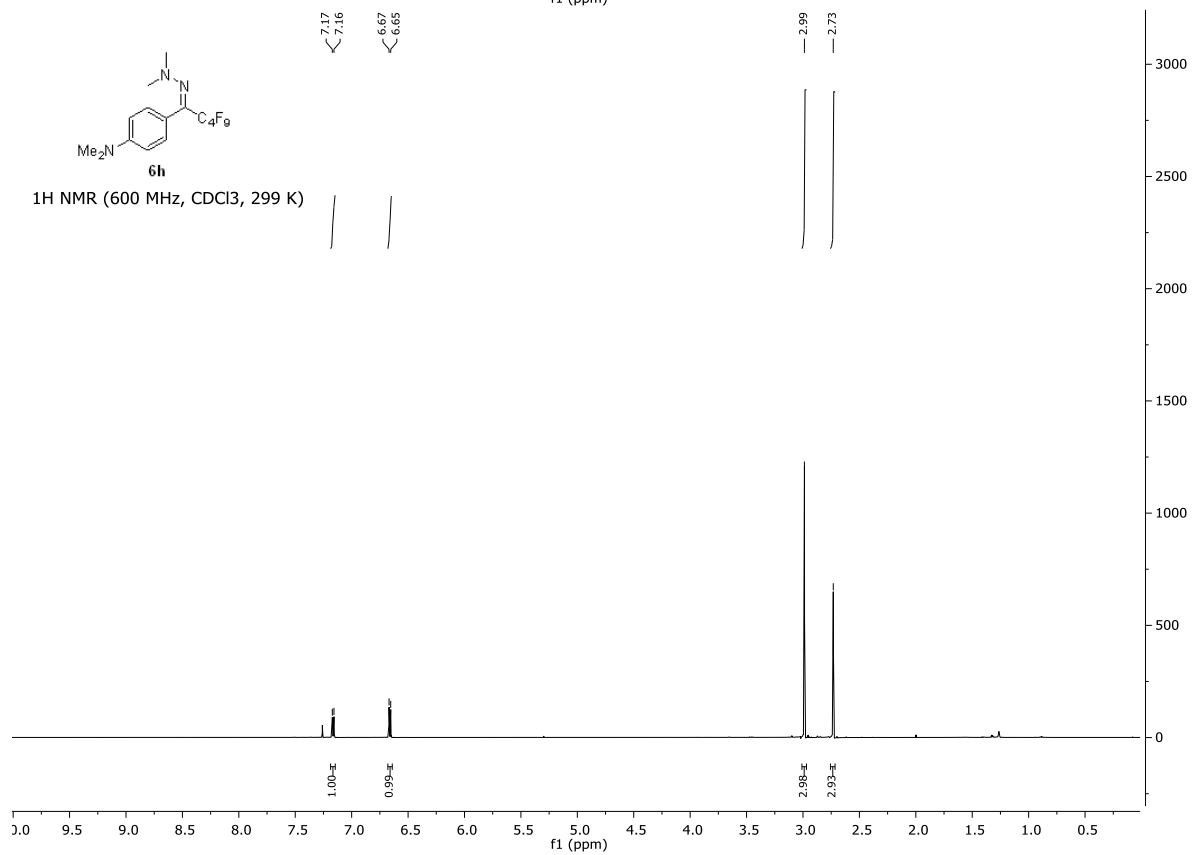

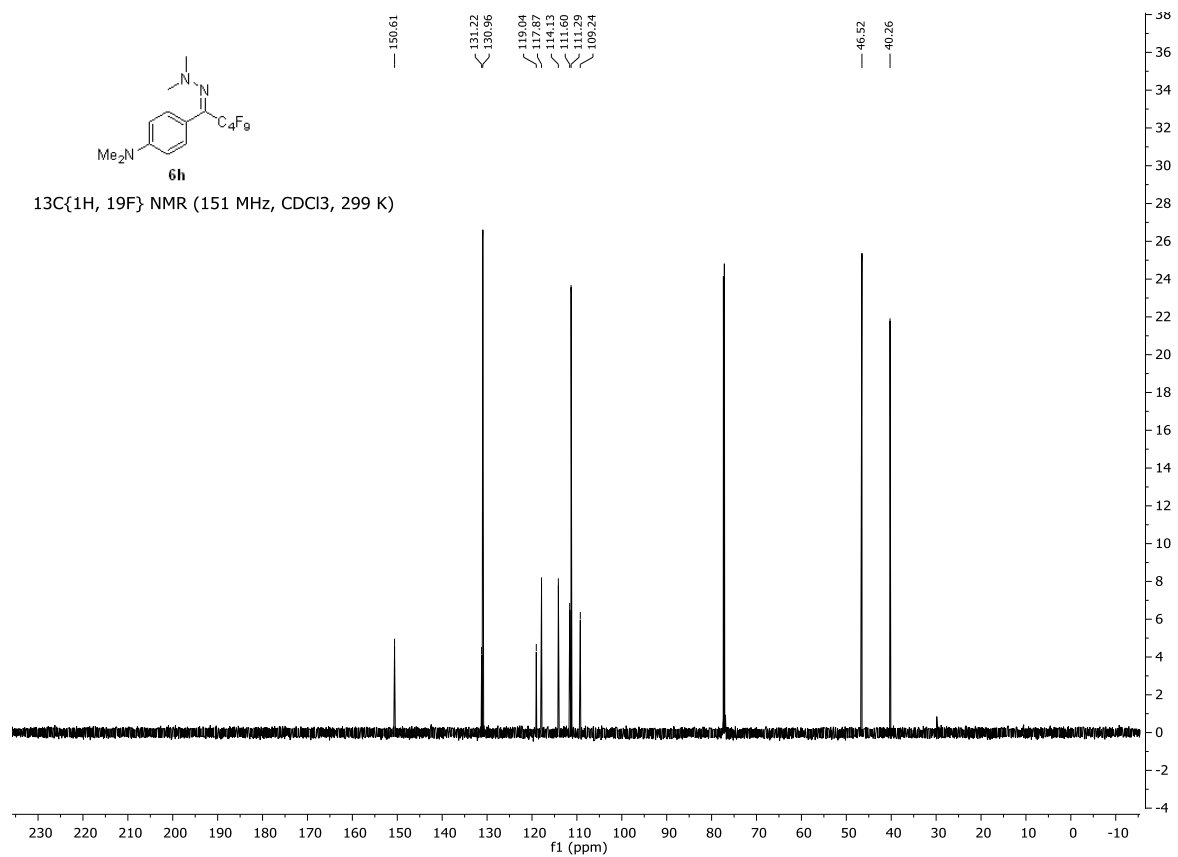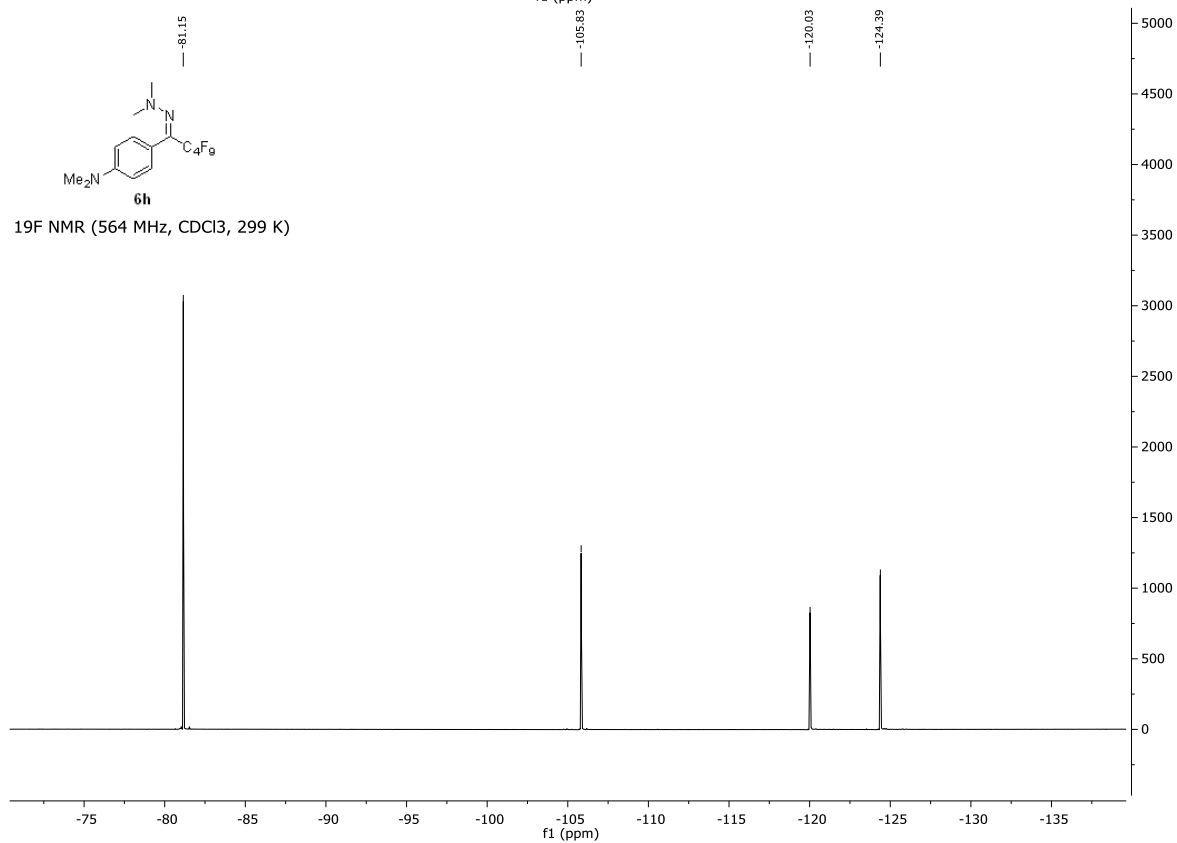

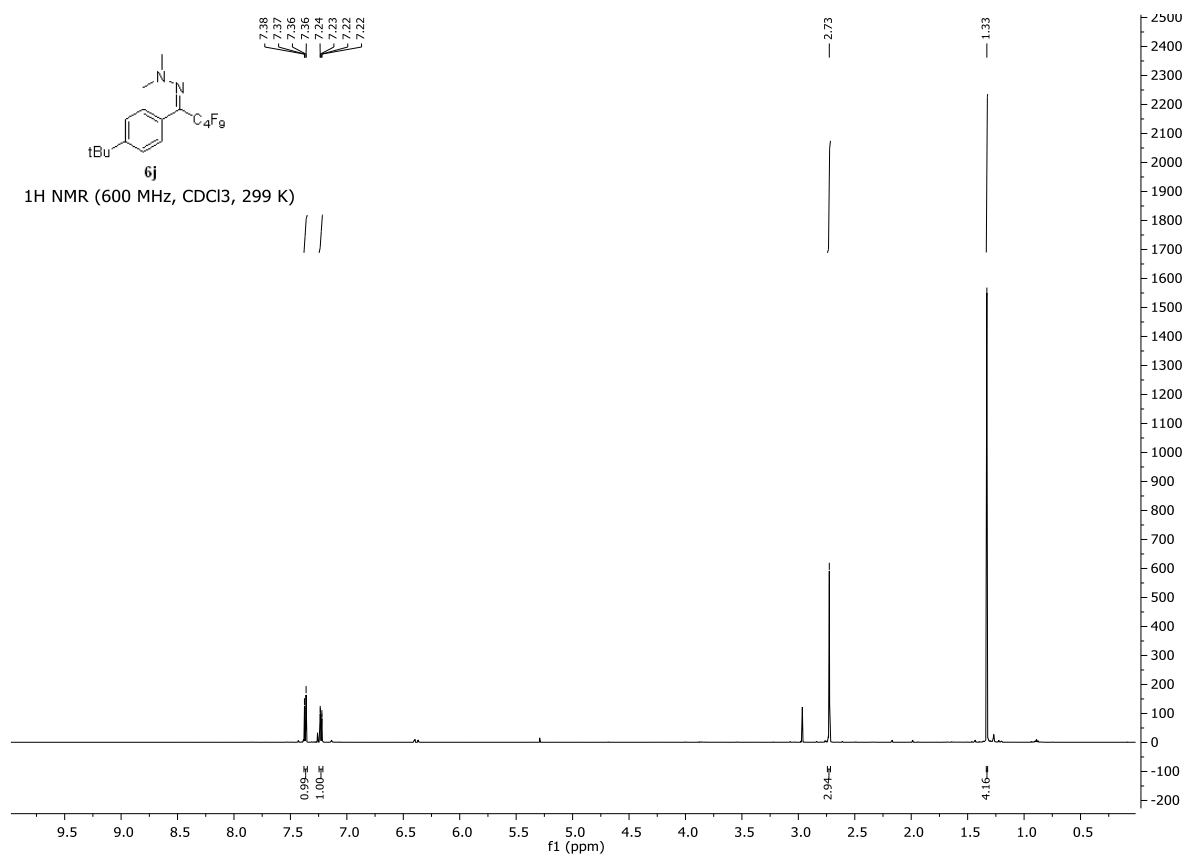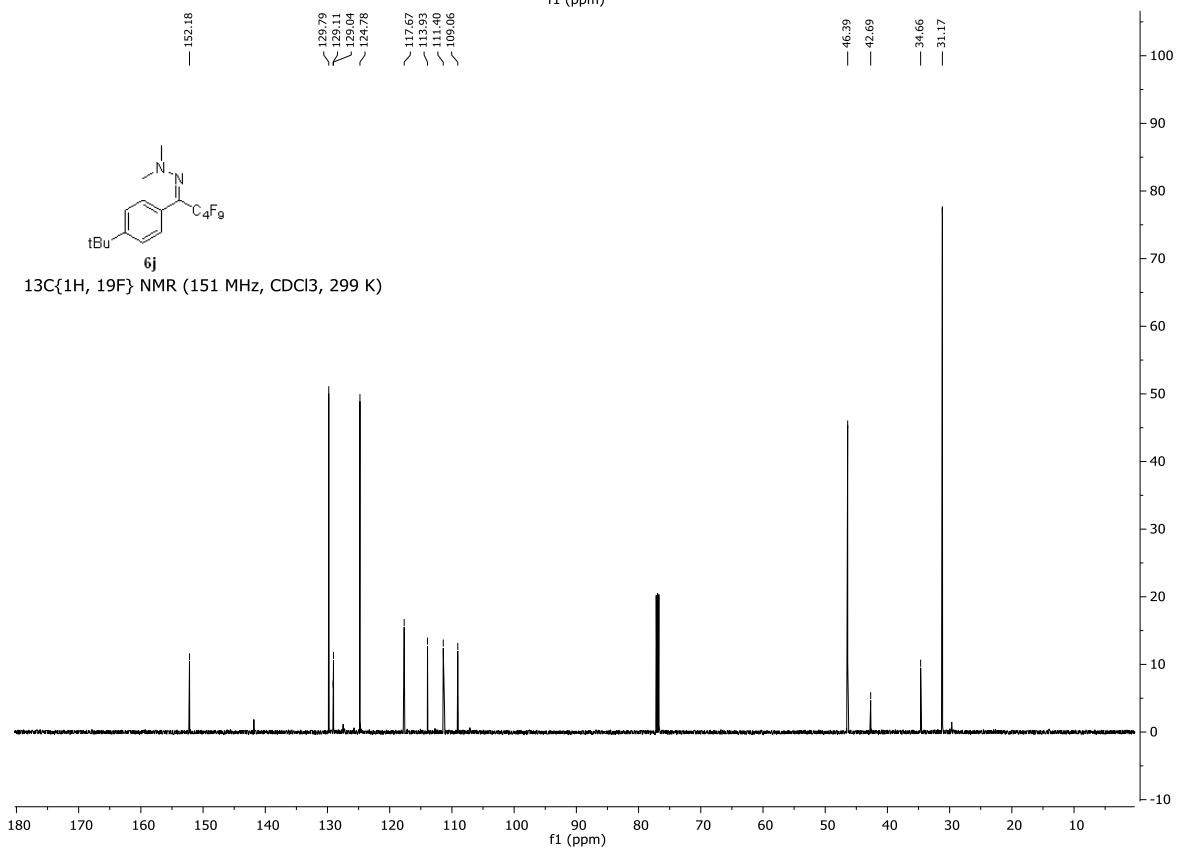

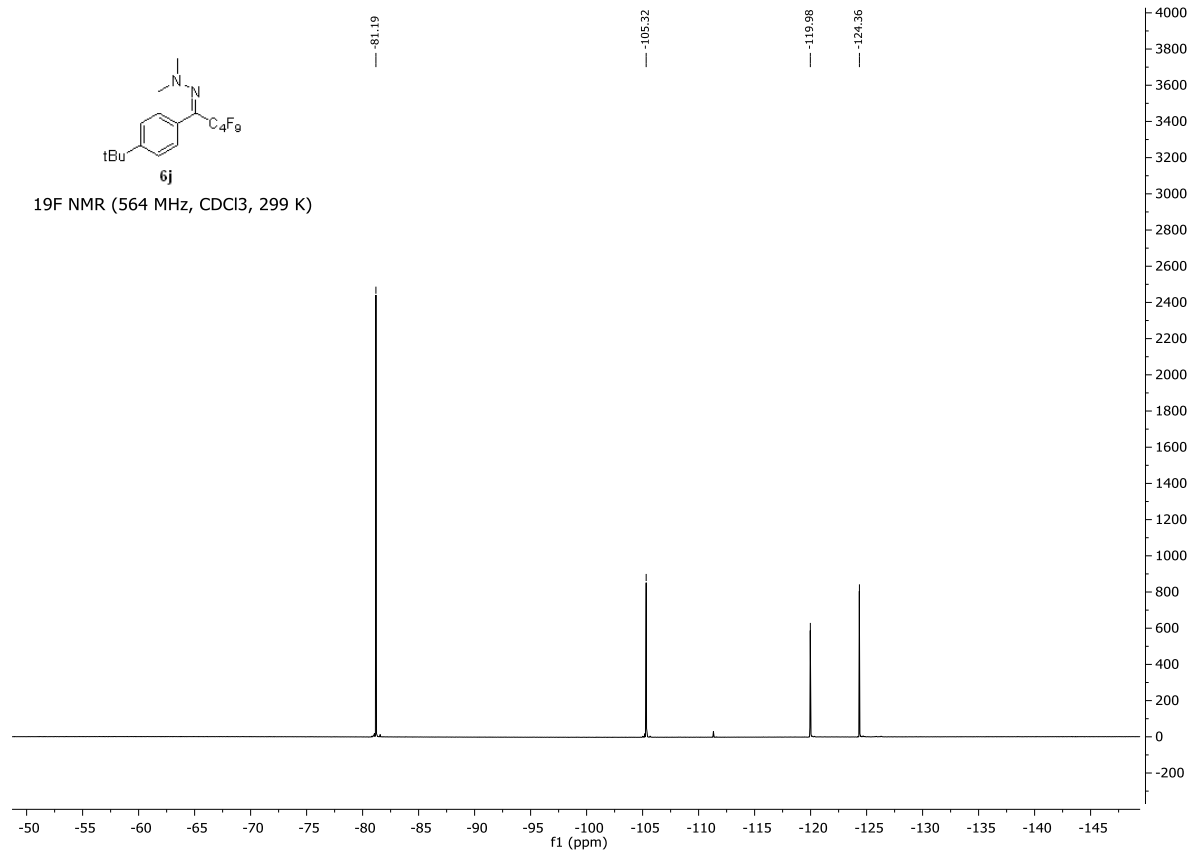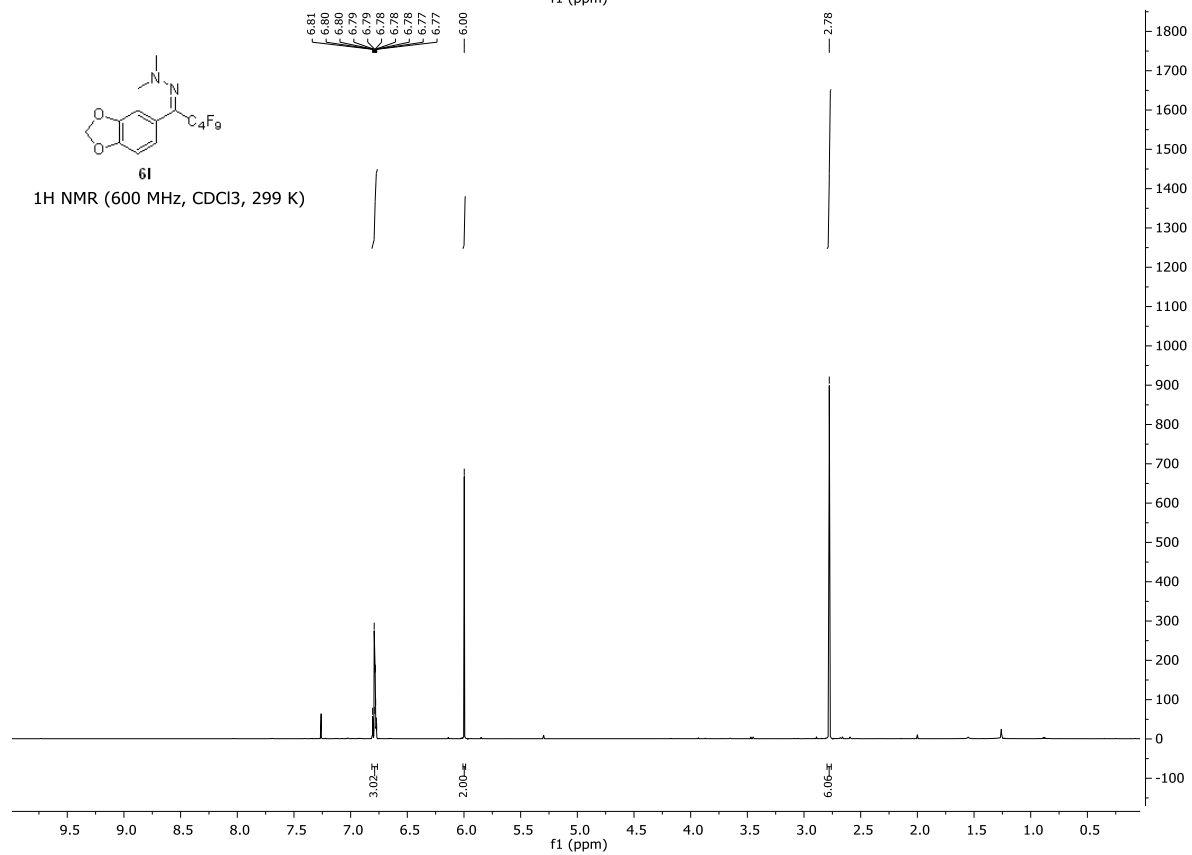

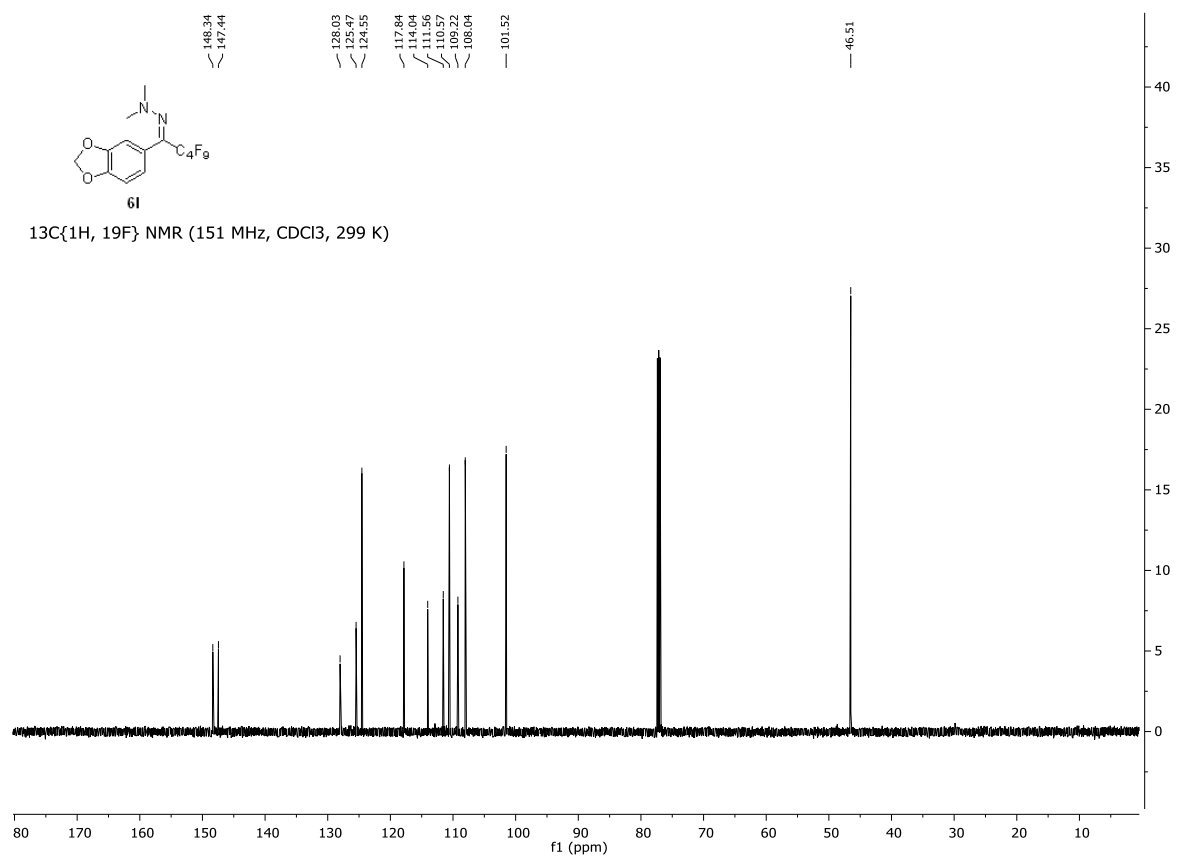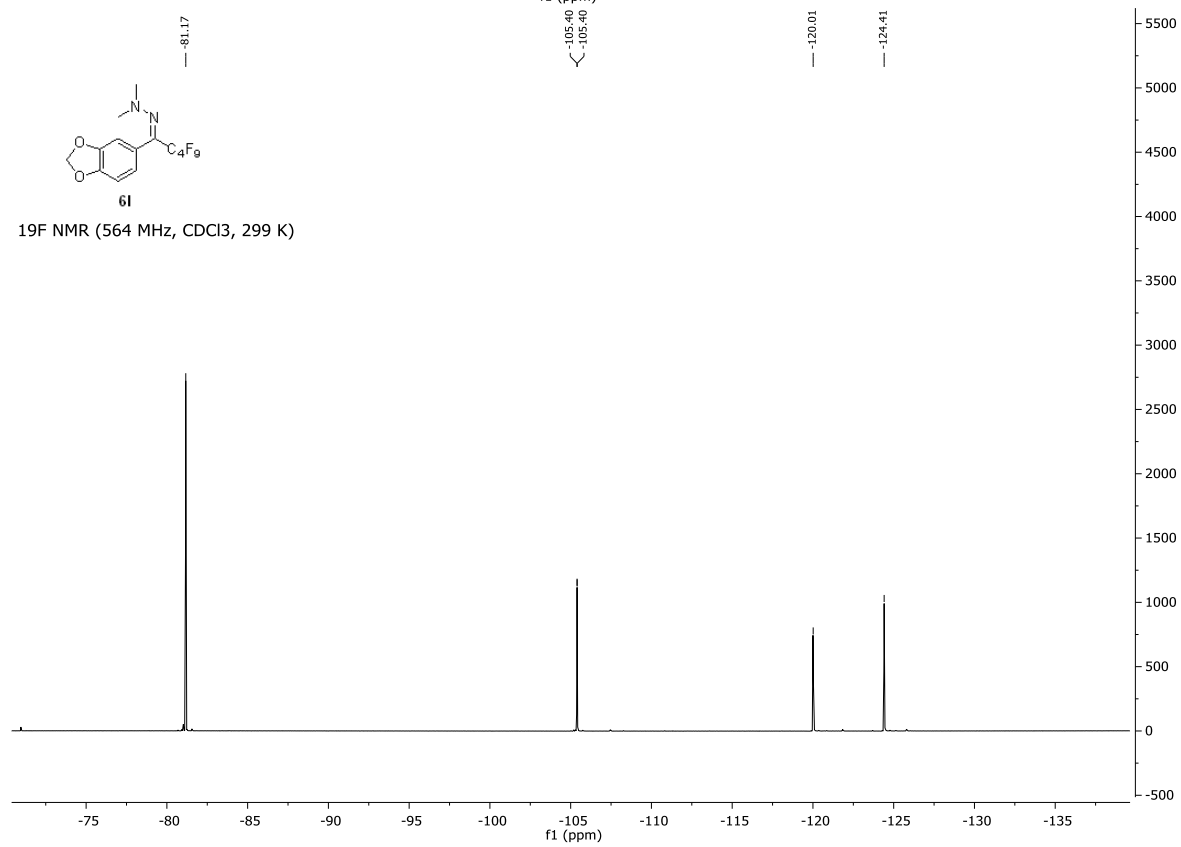

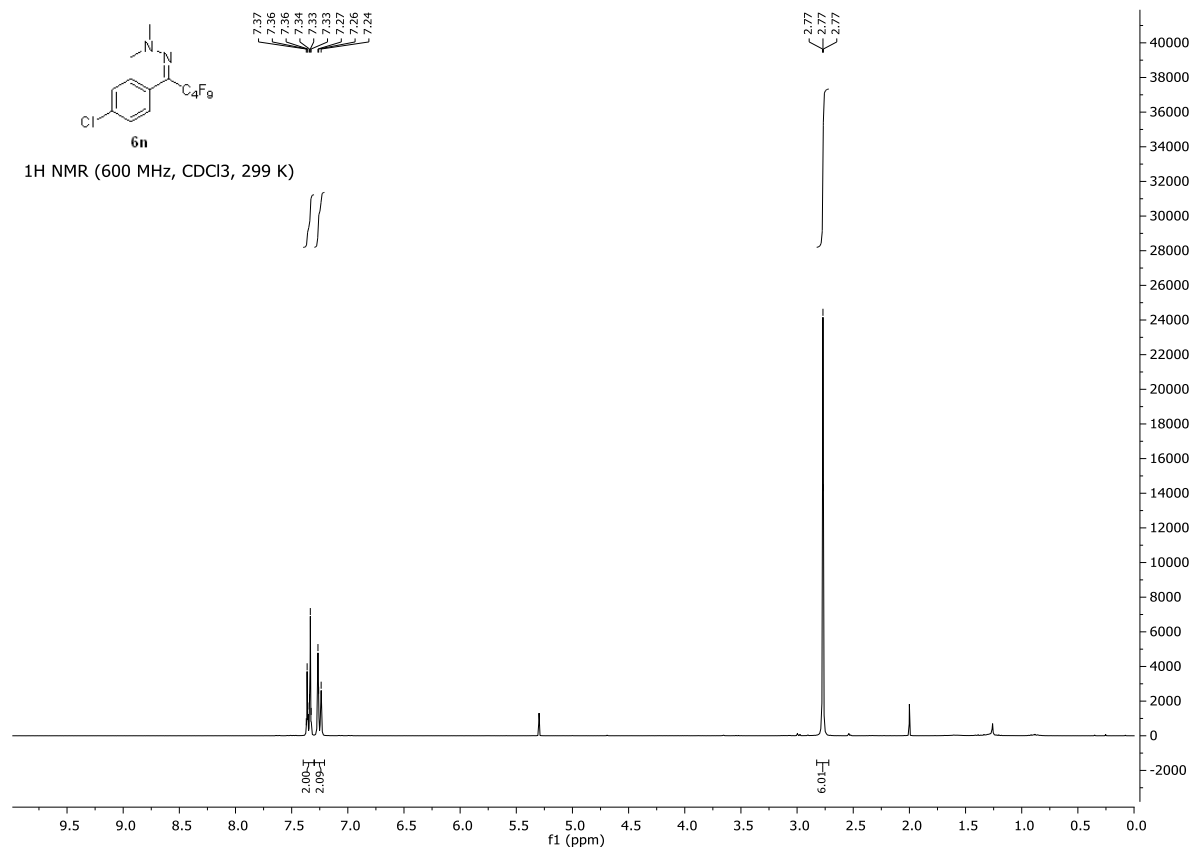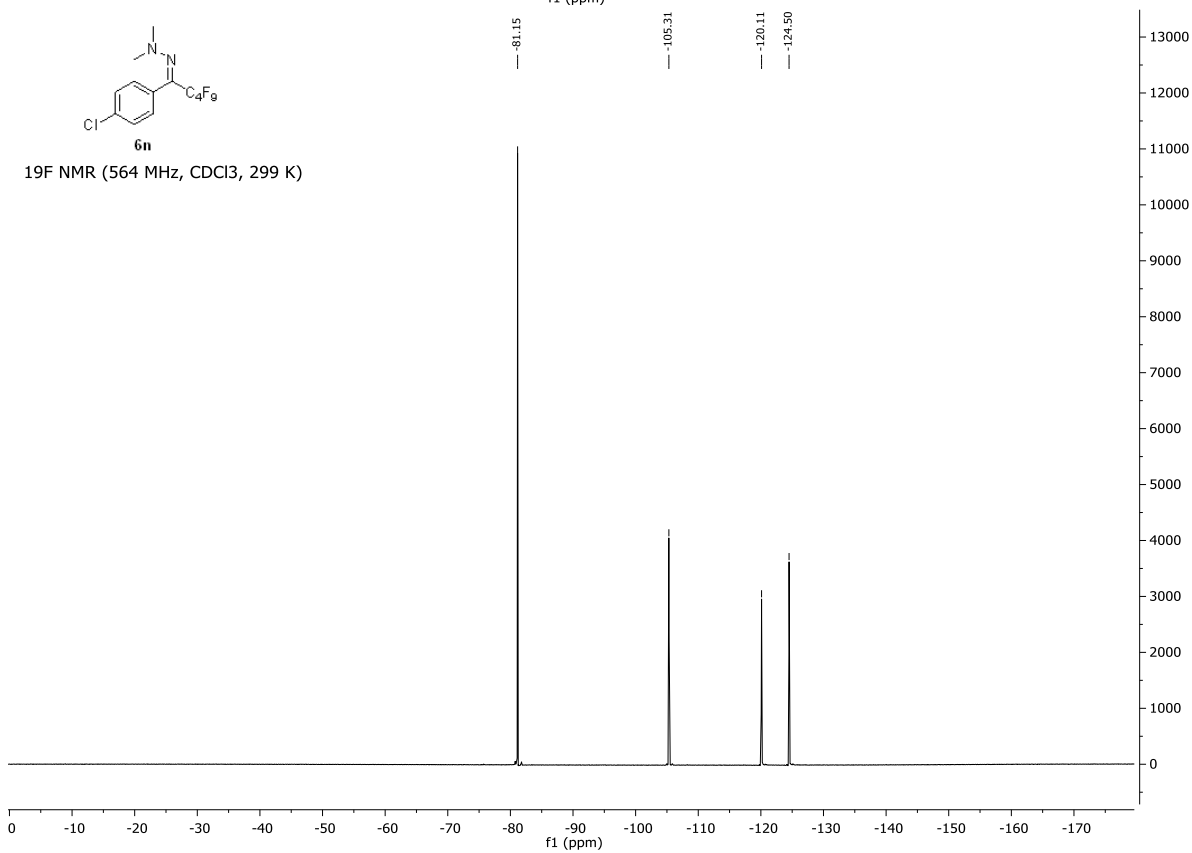



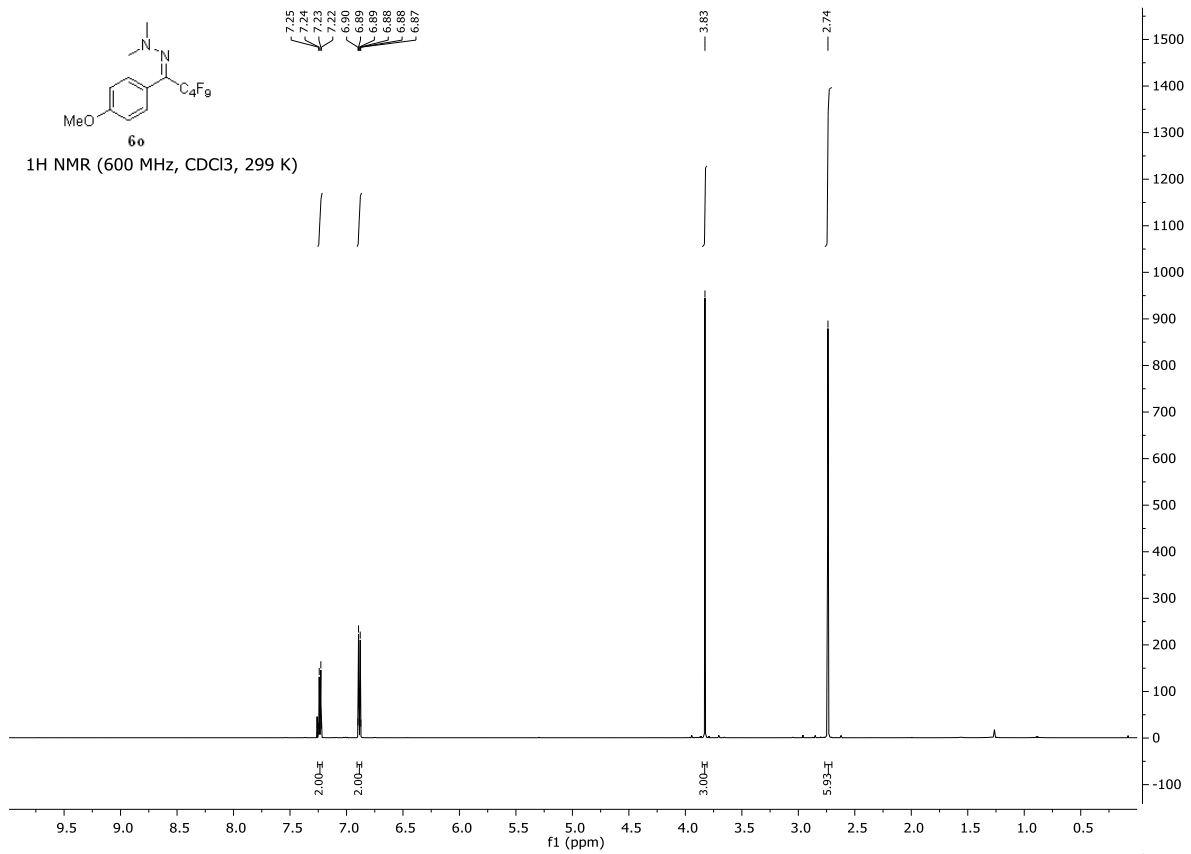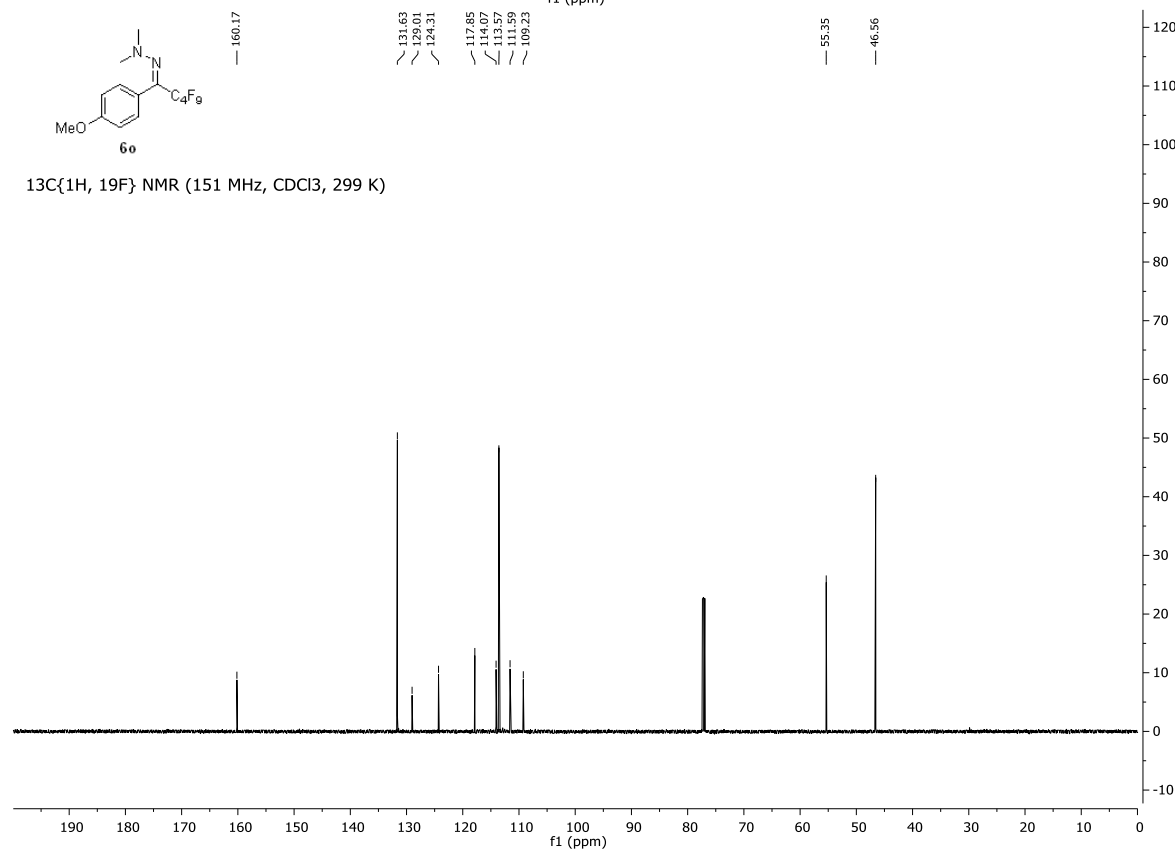

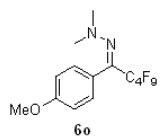

19F NMR (564 MHz, CDCl<sub>3</sub>, 299 K)

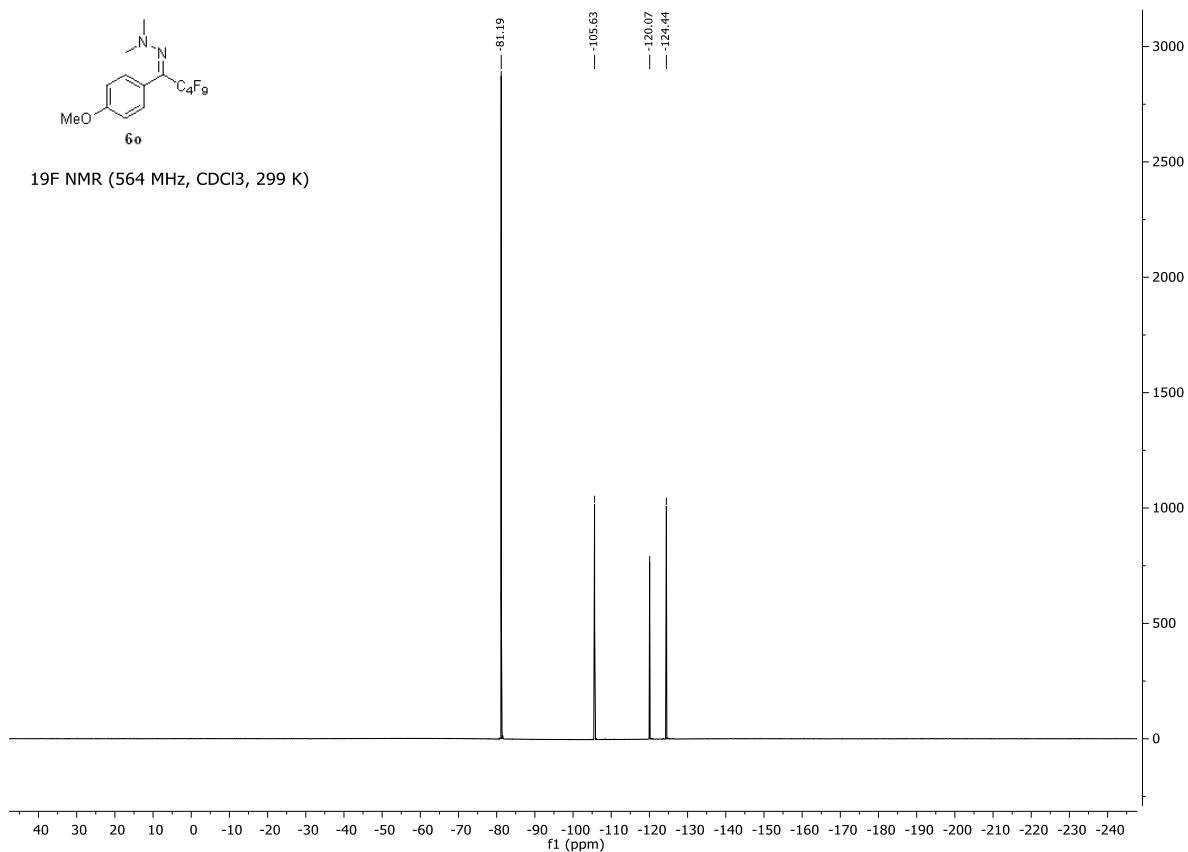

7.87, 7.86, 7.86, 7.86, 7.85, 7.85, 7.85, 7.85, 7.84, 7.84, 7.83, 7.81, 7.80, 7.55, 7.55, 7.55, 7.54, 7.54, 7.53, 7.53, 7.53, 7.52, 7.43, 7.43, 7.42, 7.42

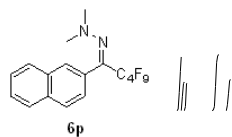

1H NMR (600 MHz, CDCl<sub>3</sub>, 299 K)

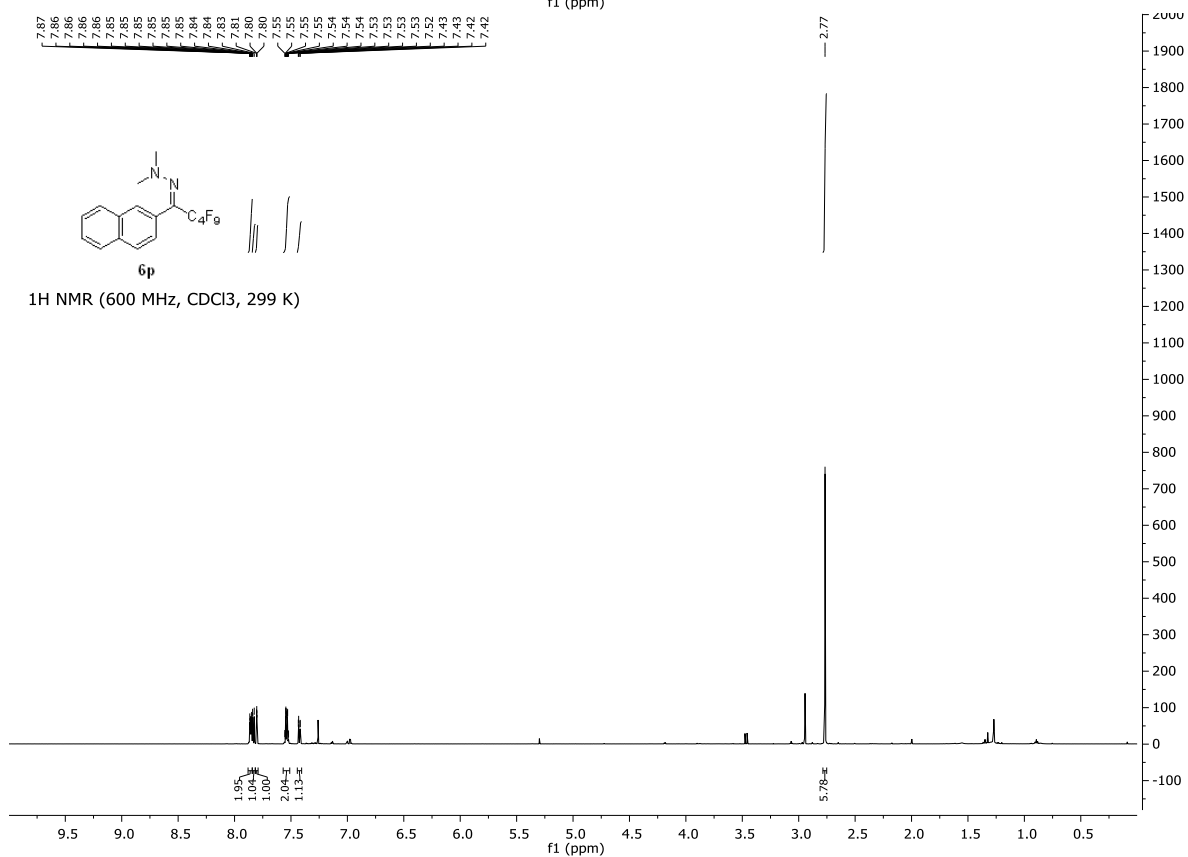

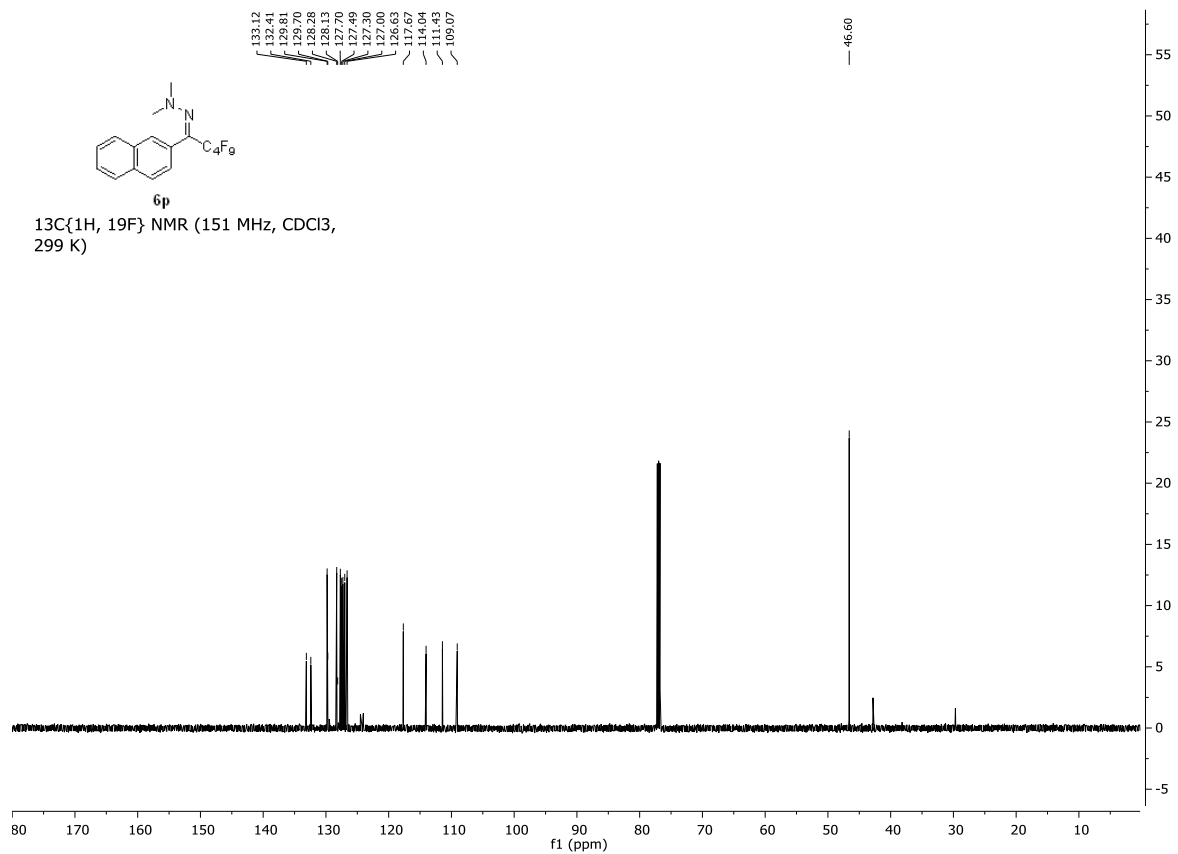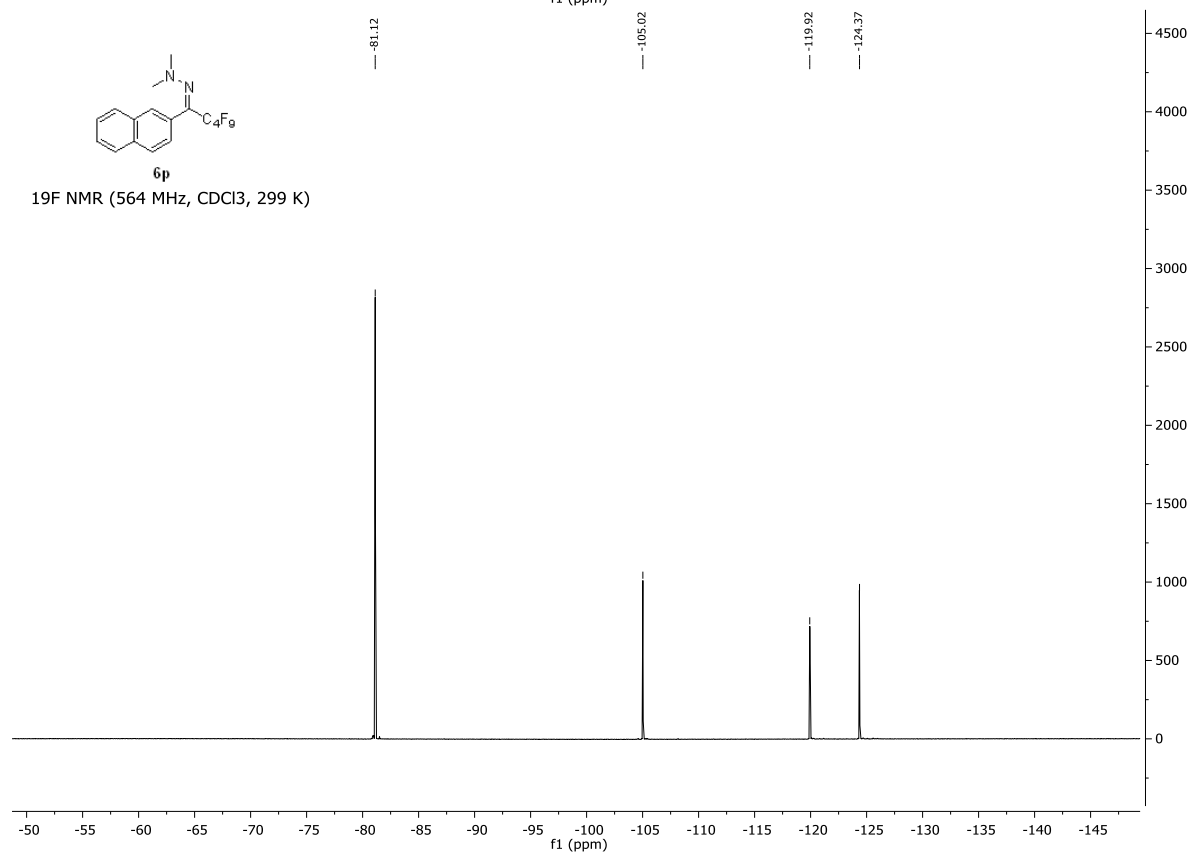

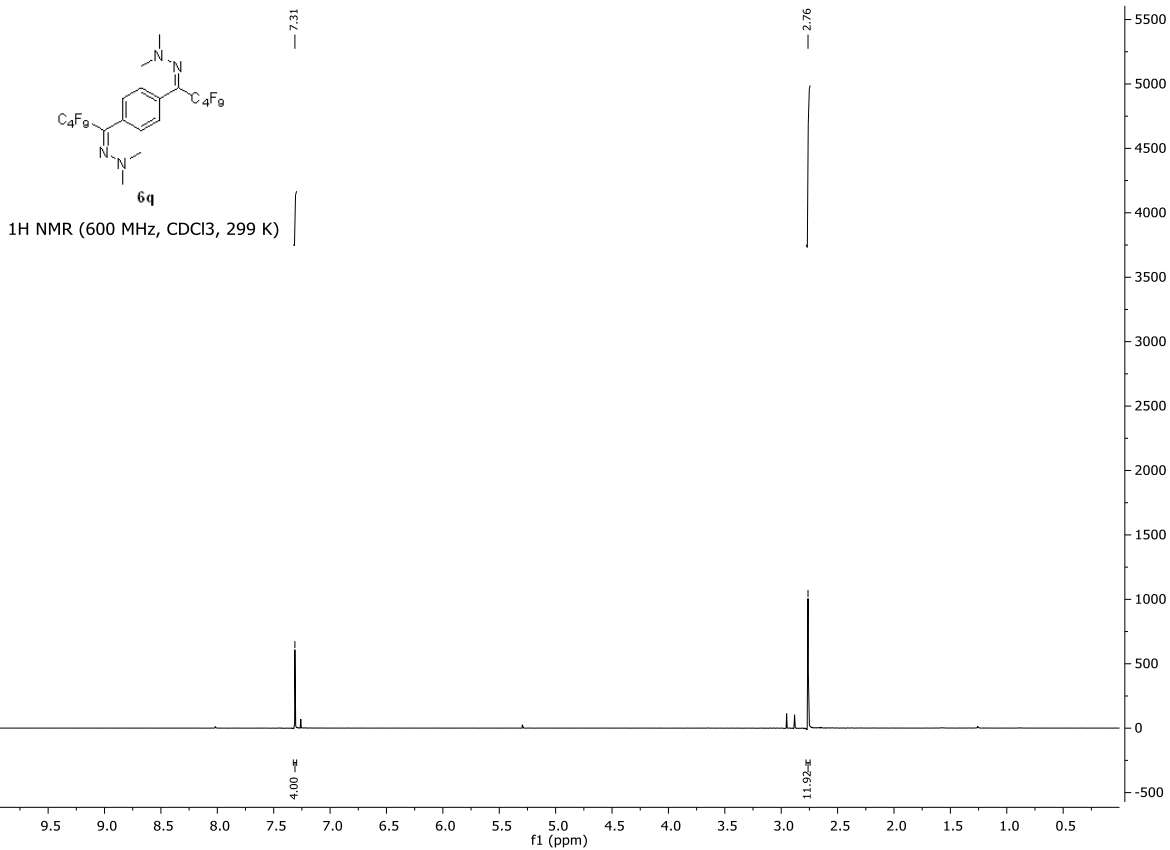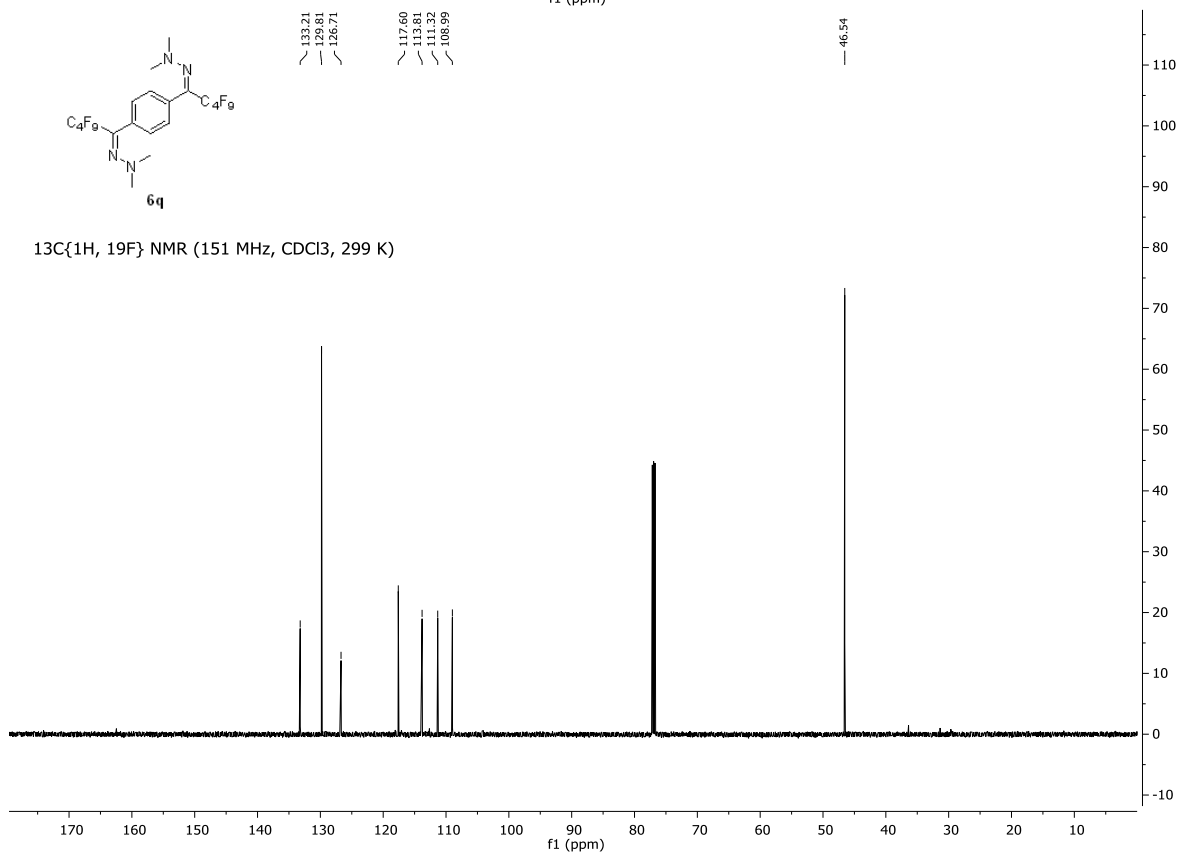

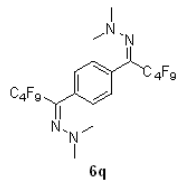

19F NMR (564 MHz, CDCl<sub>3</sub>, 299 K)

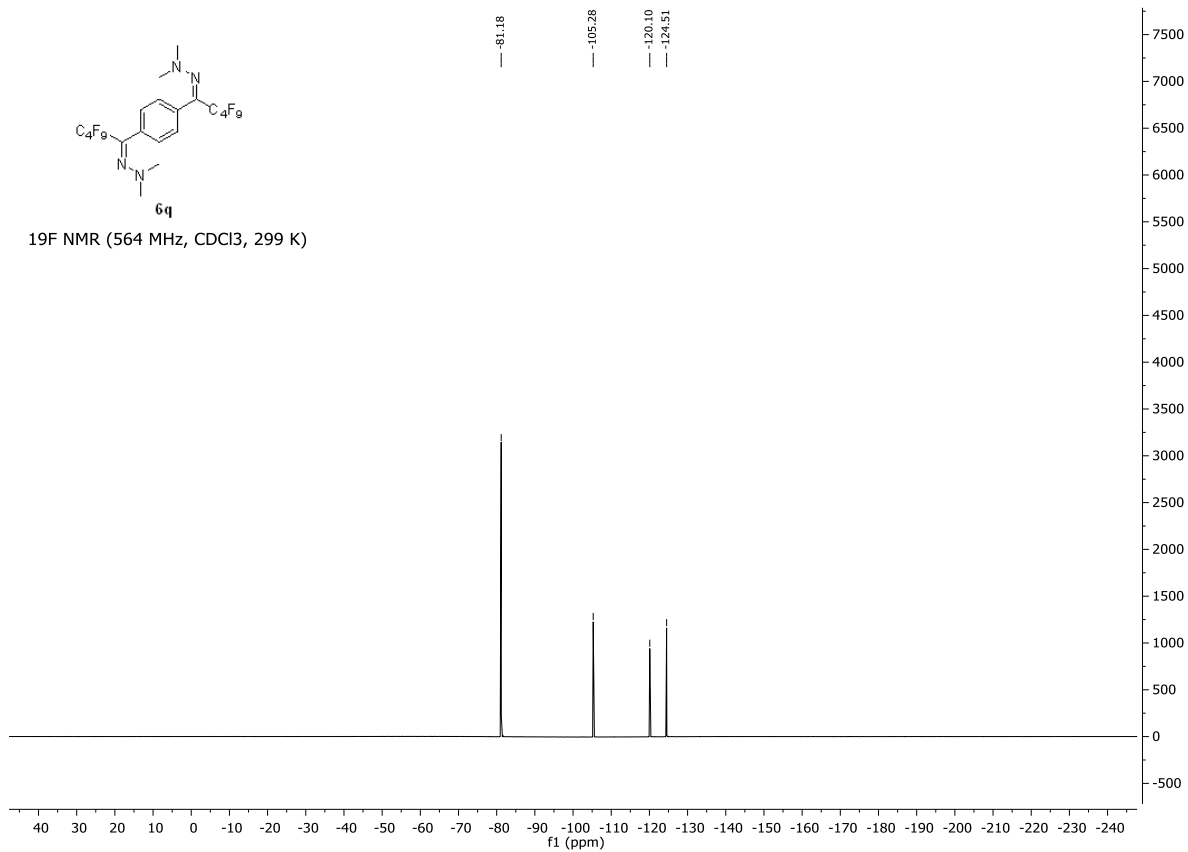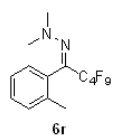

1H NMR (600 MHz, CDCl<sub>3</sub>, 299 K)

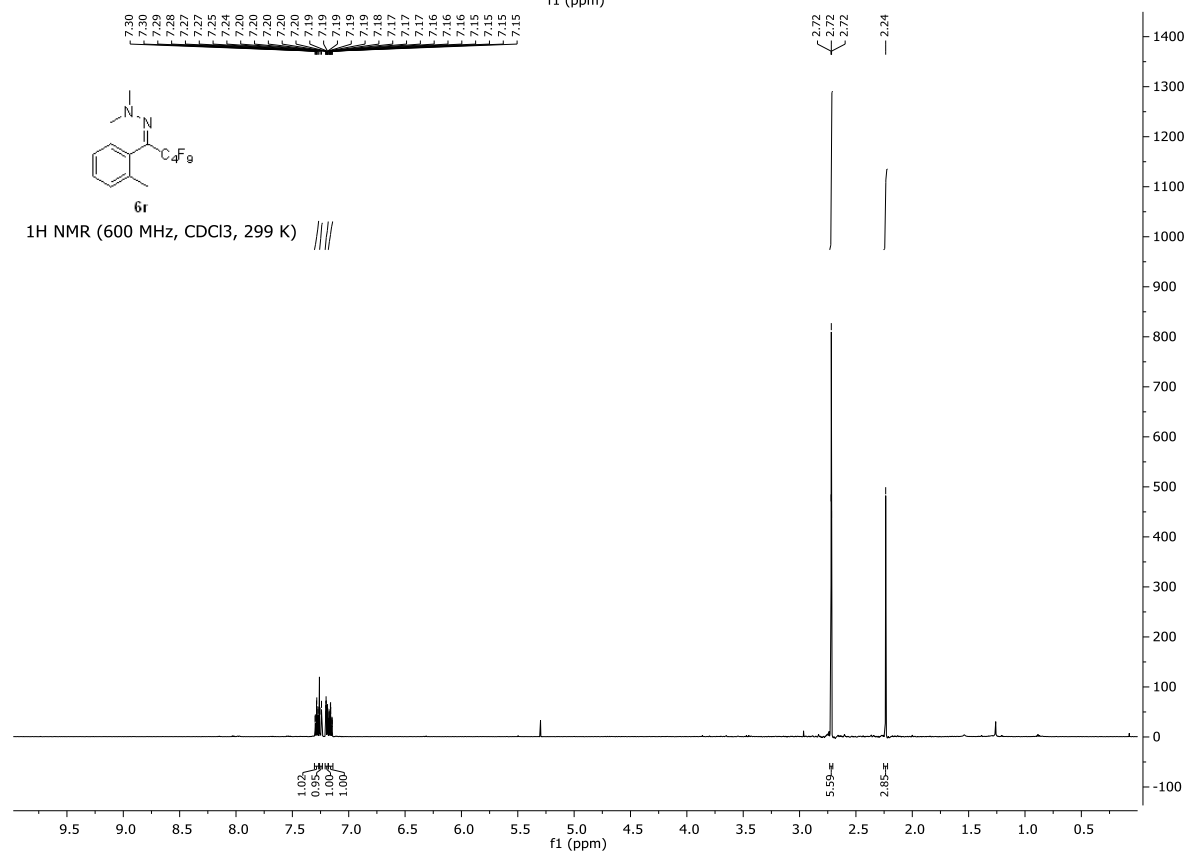

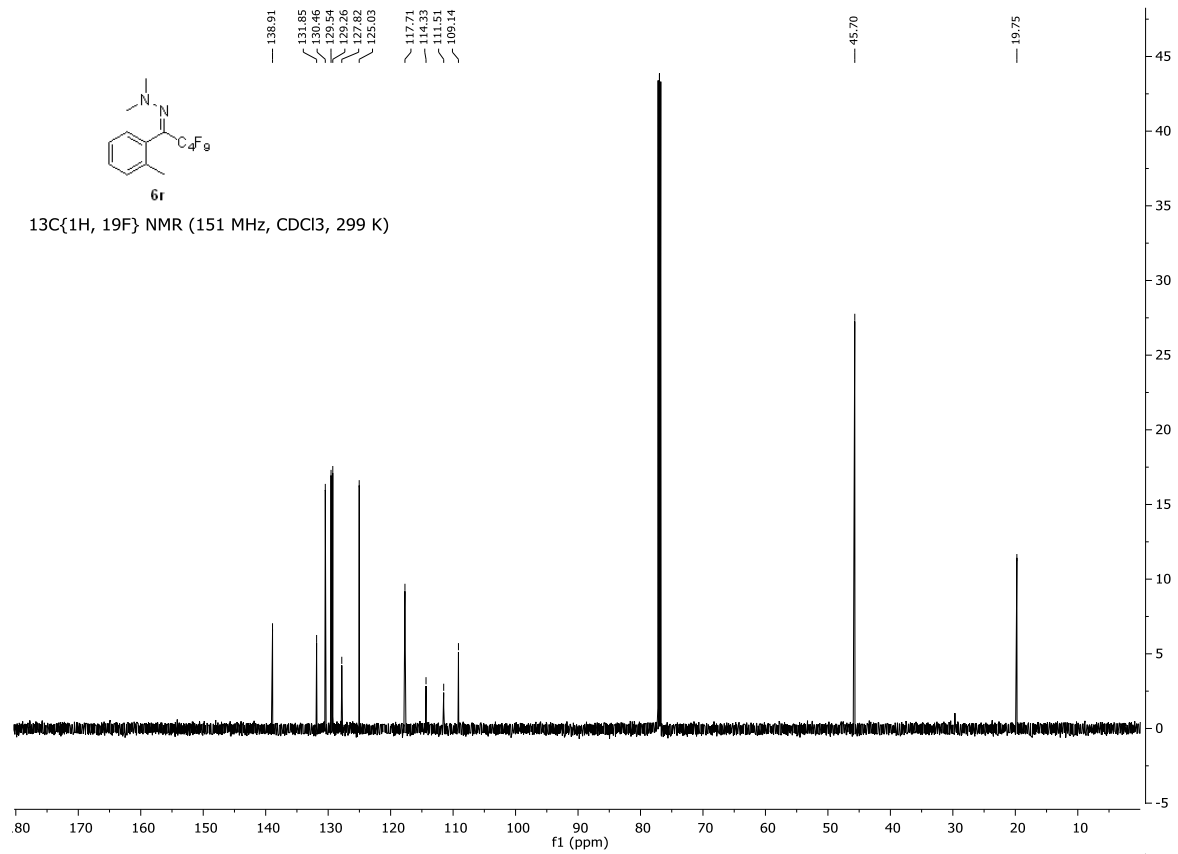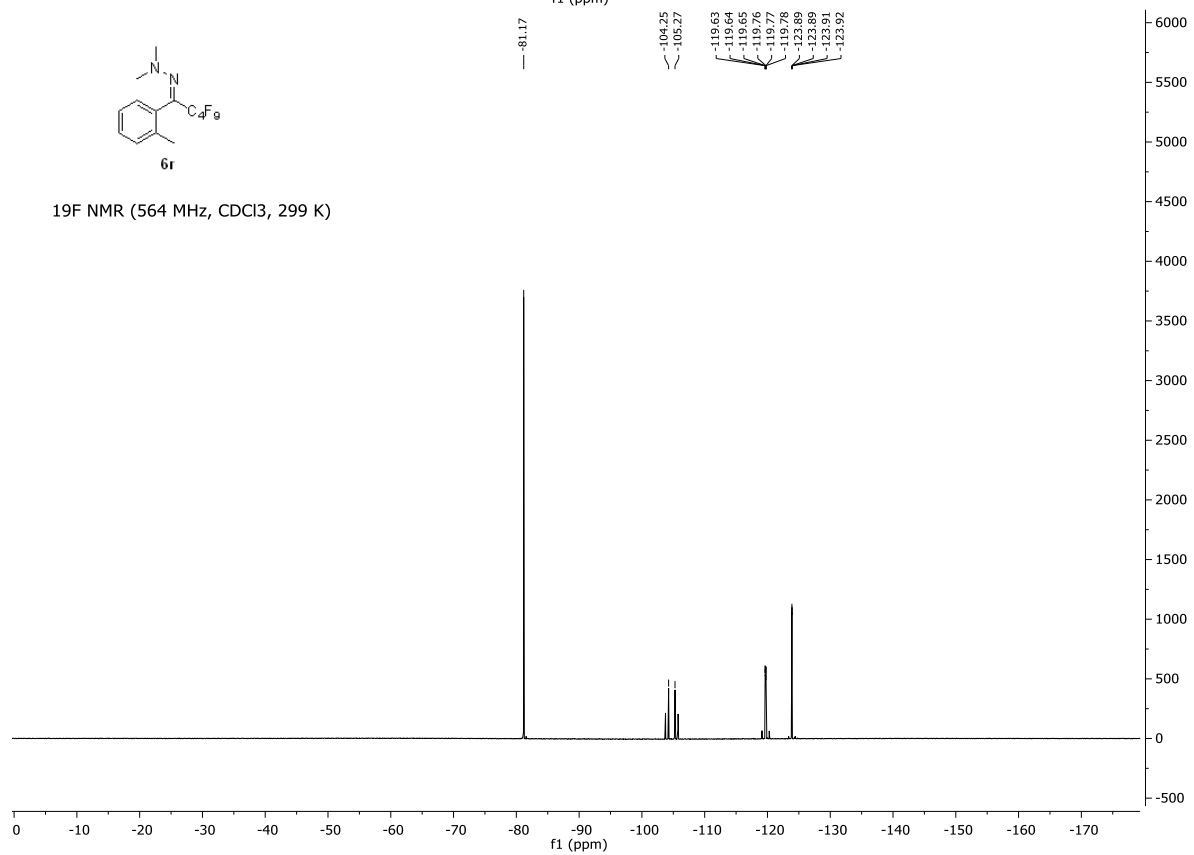

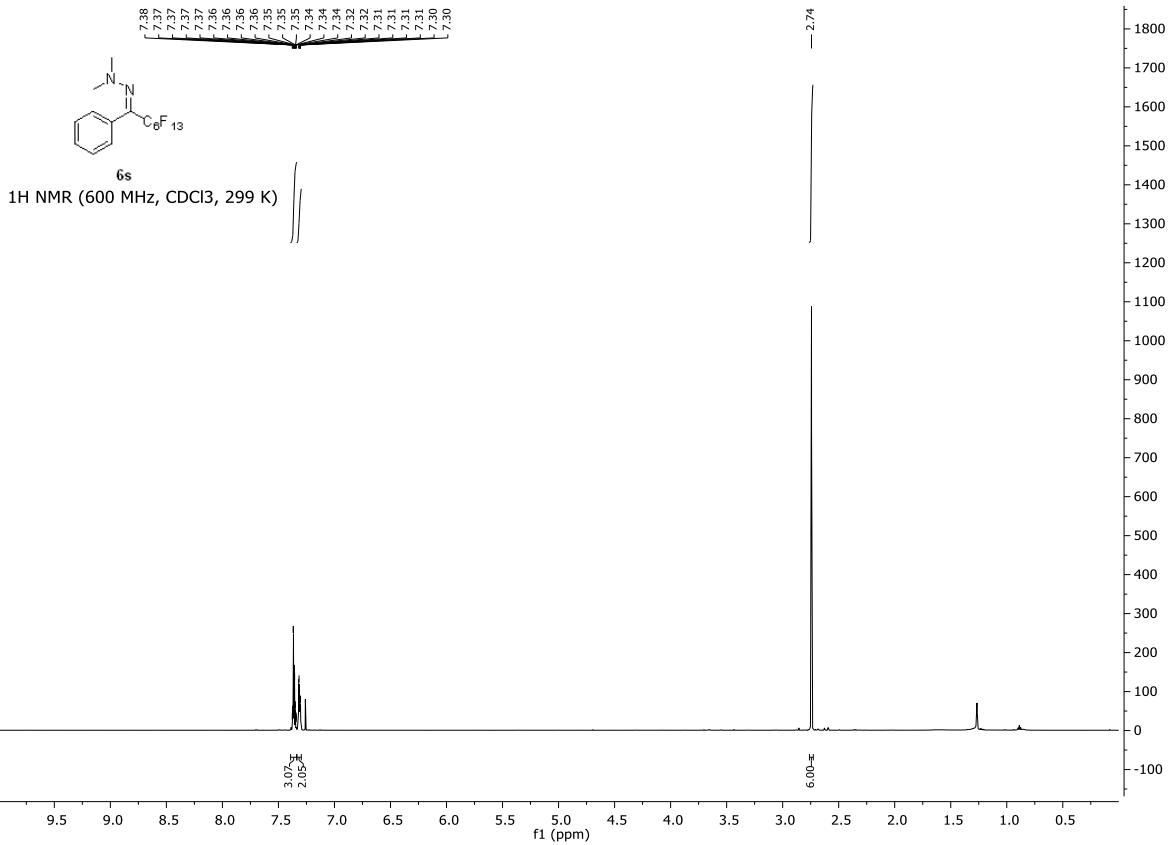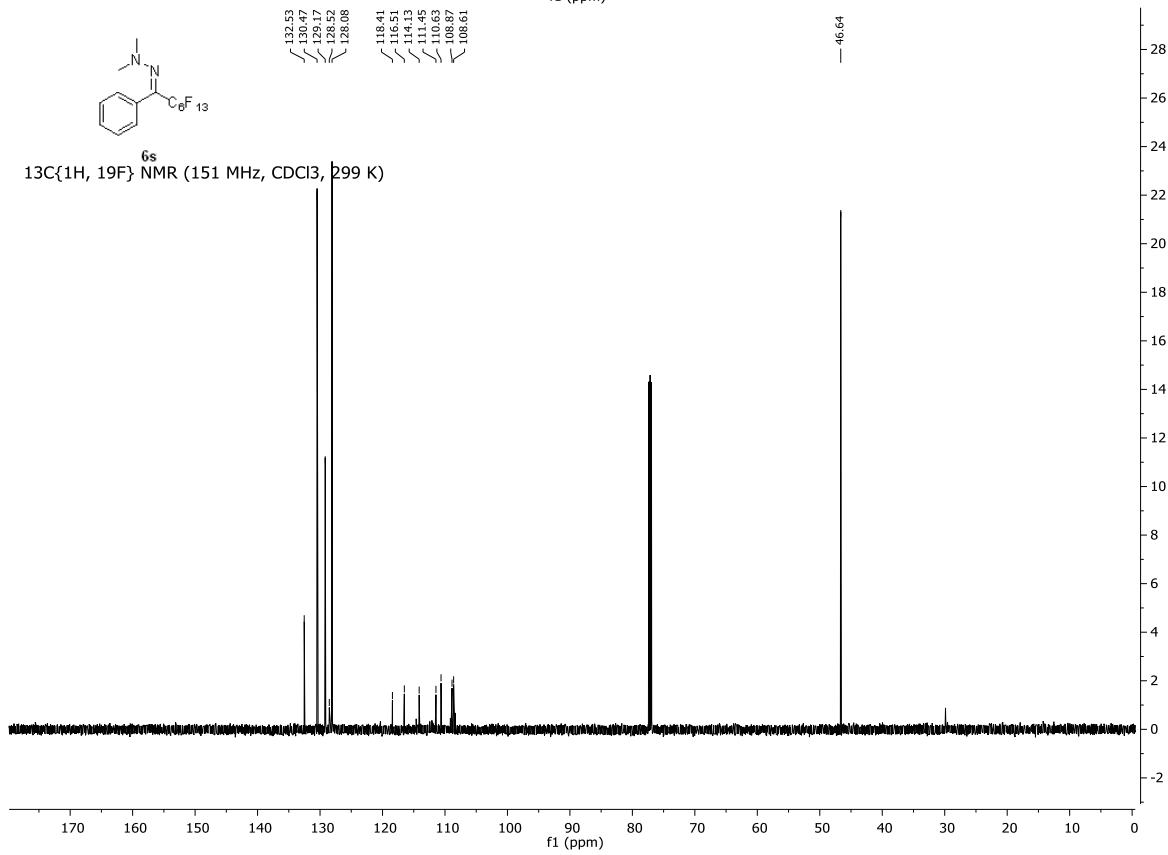

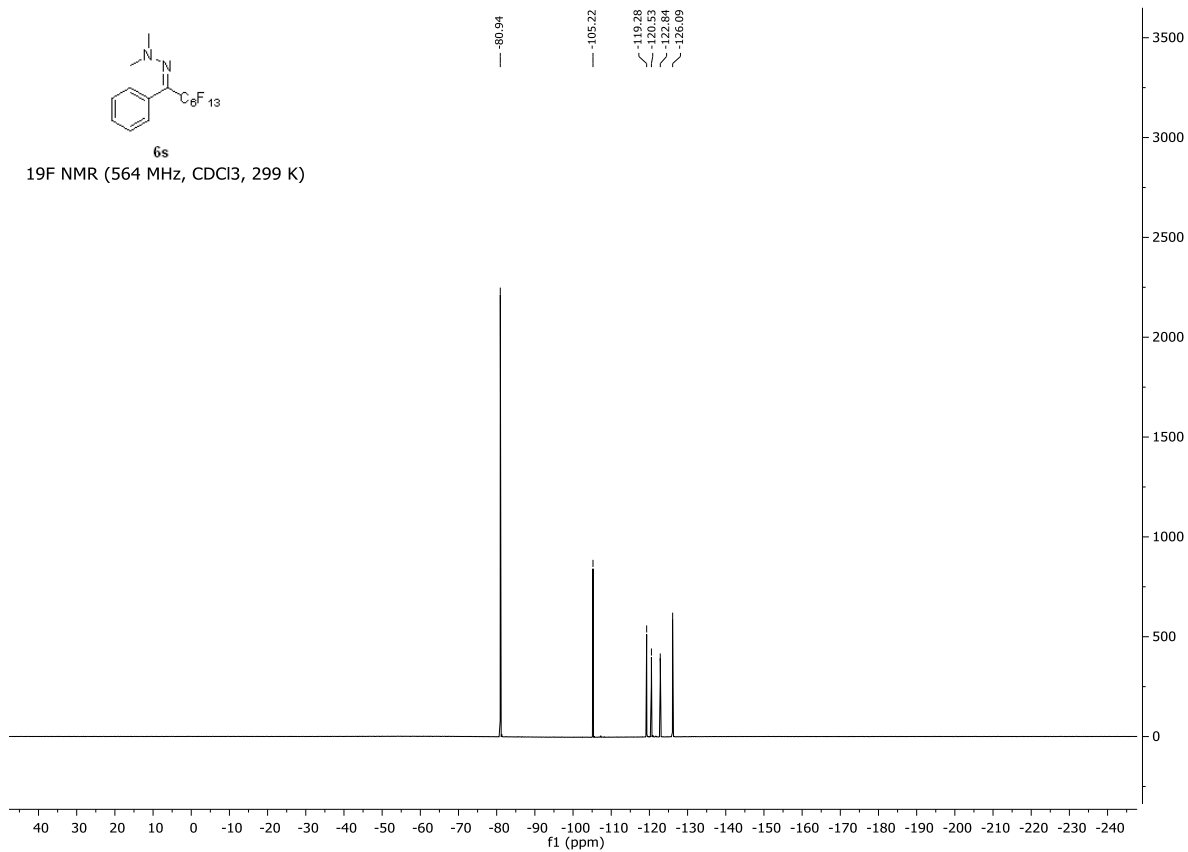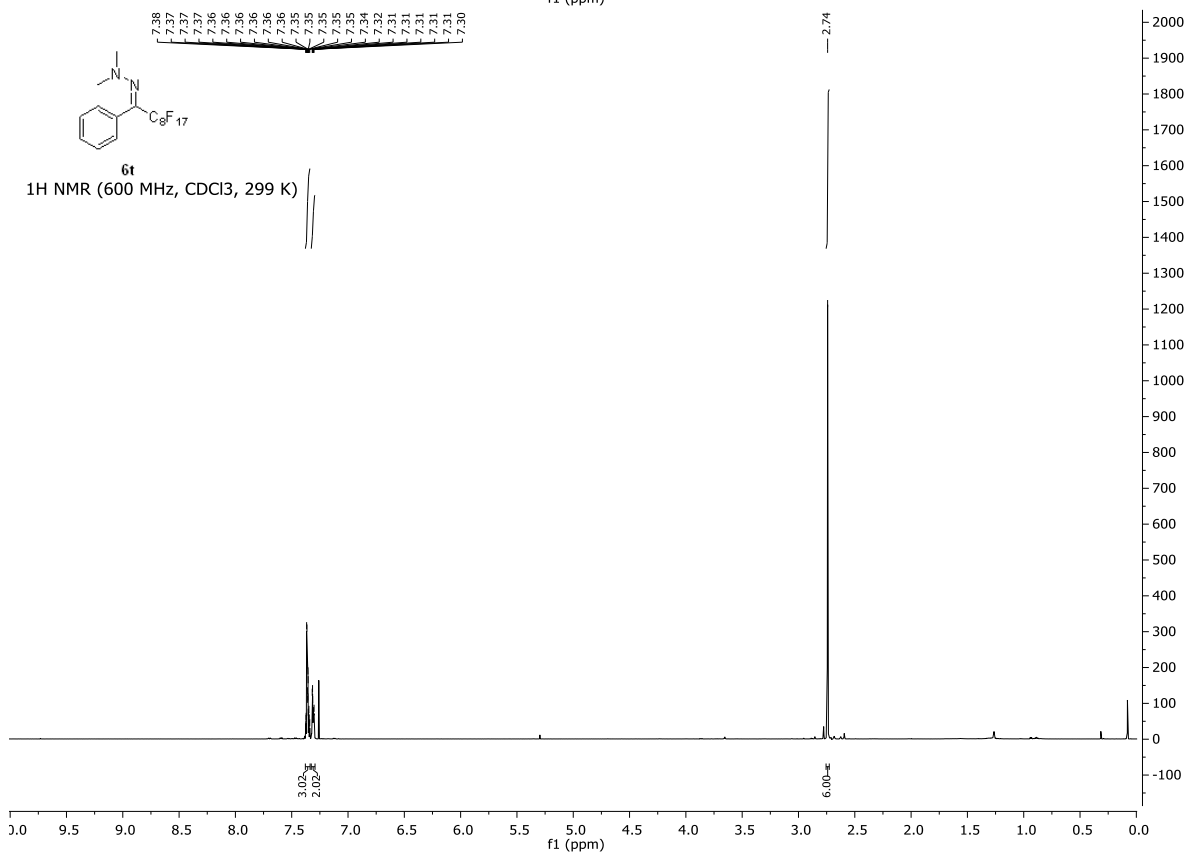



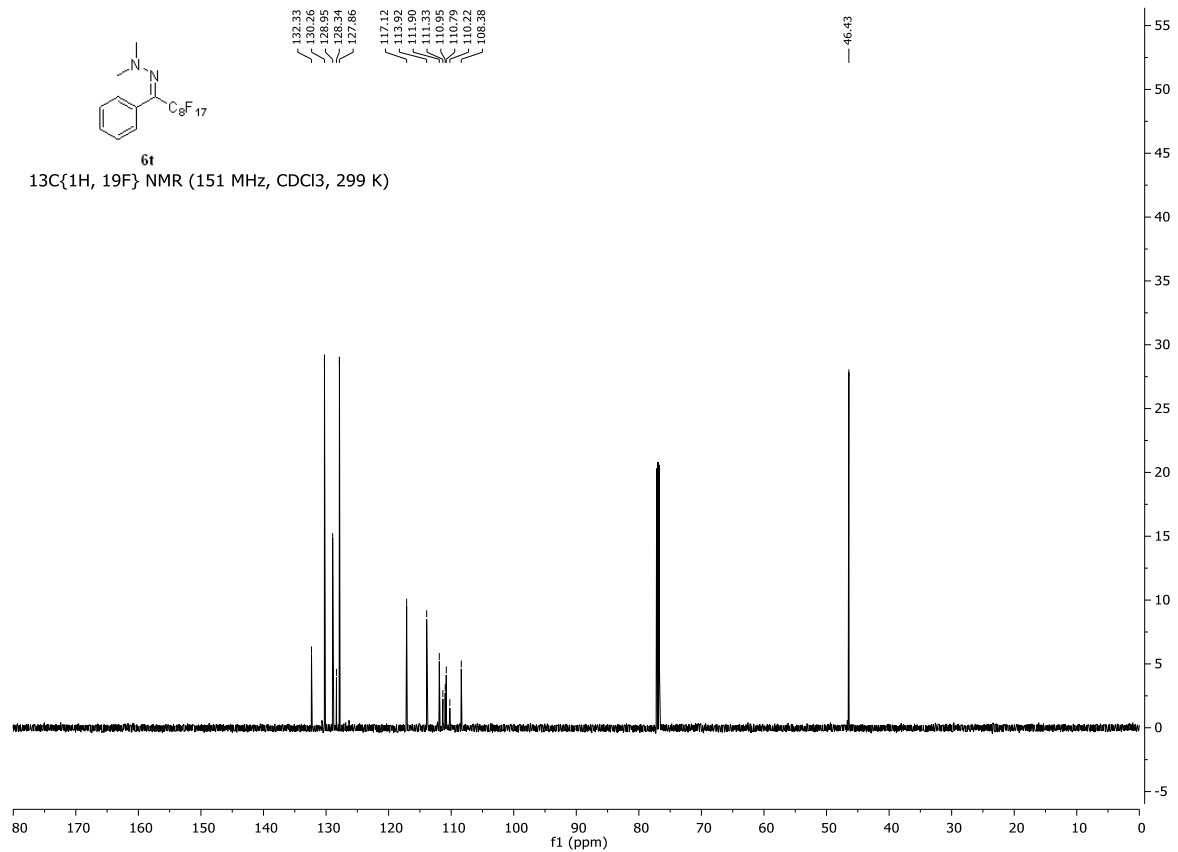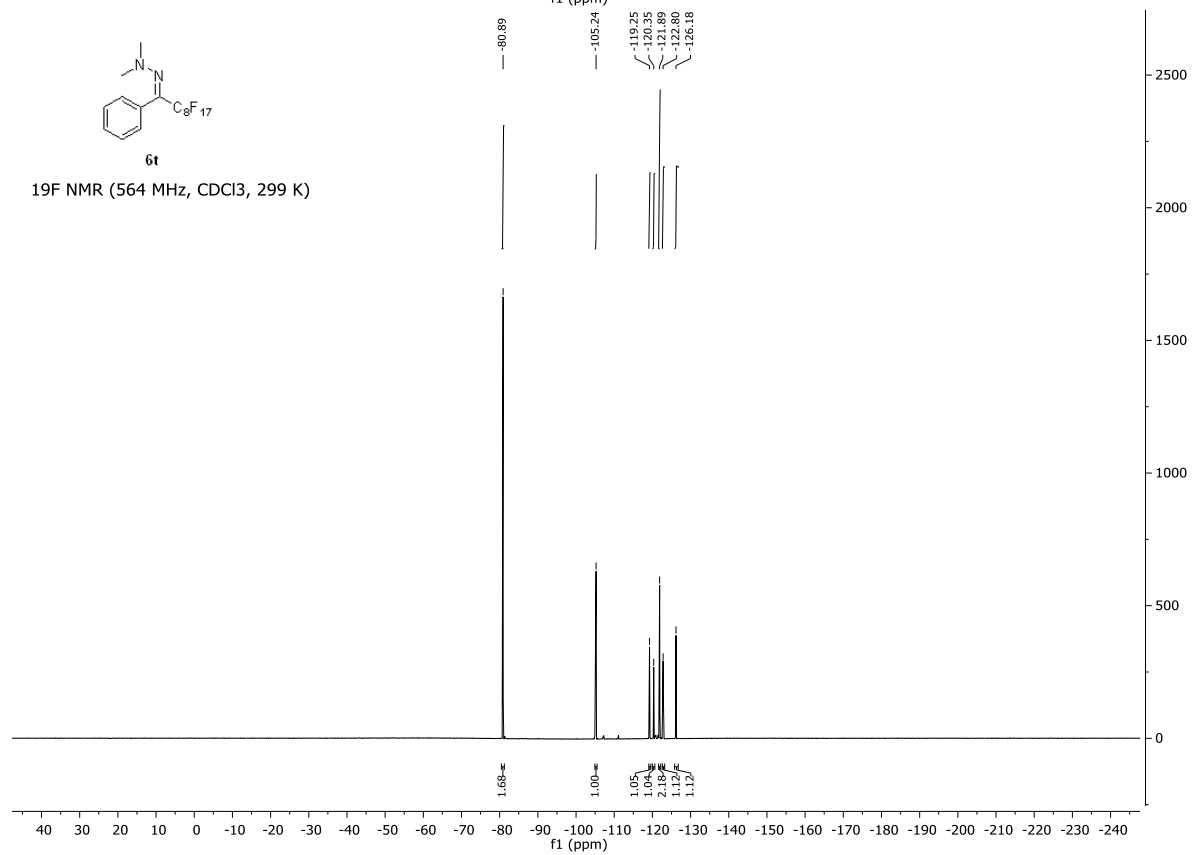

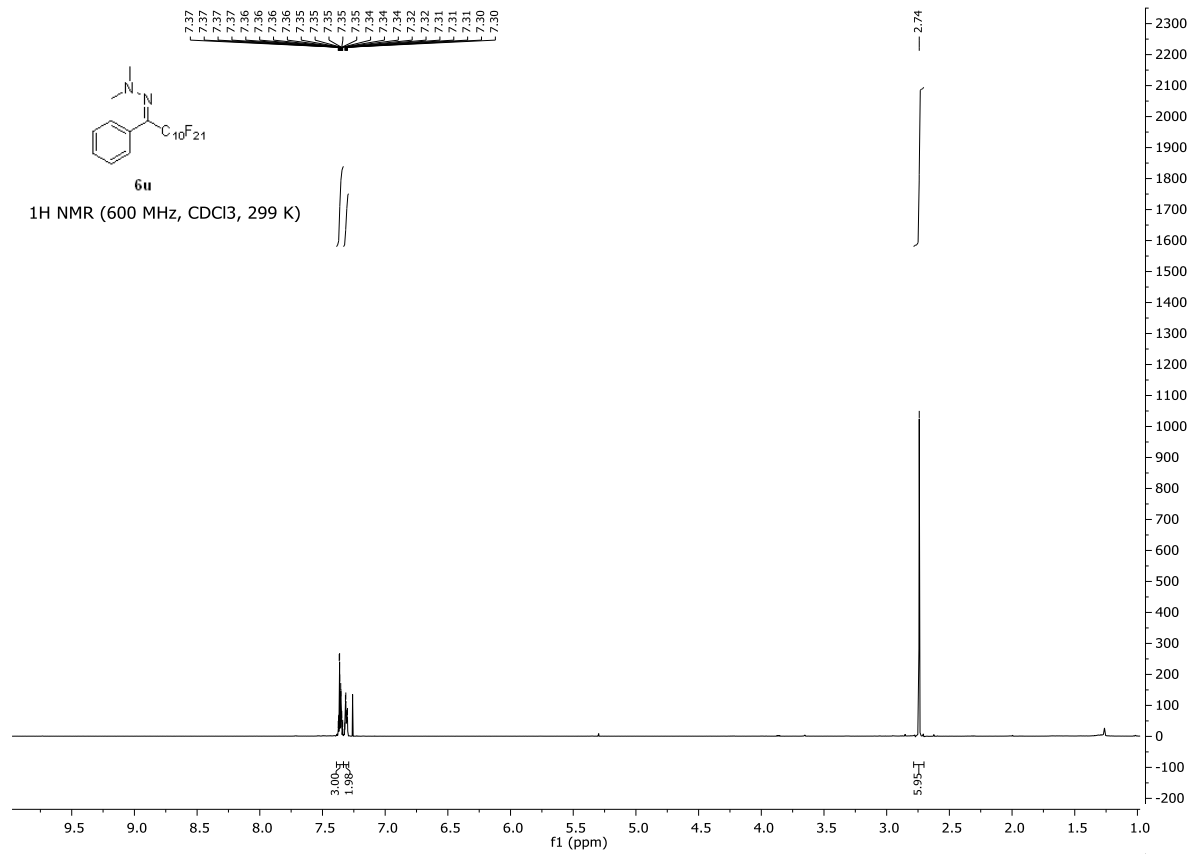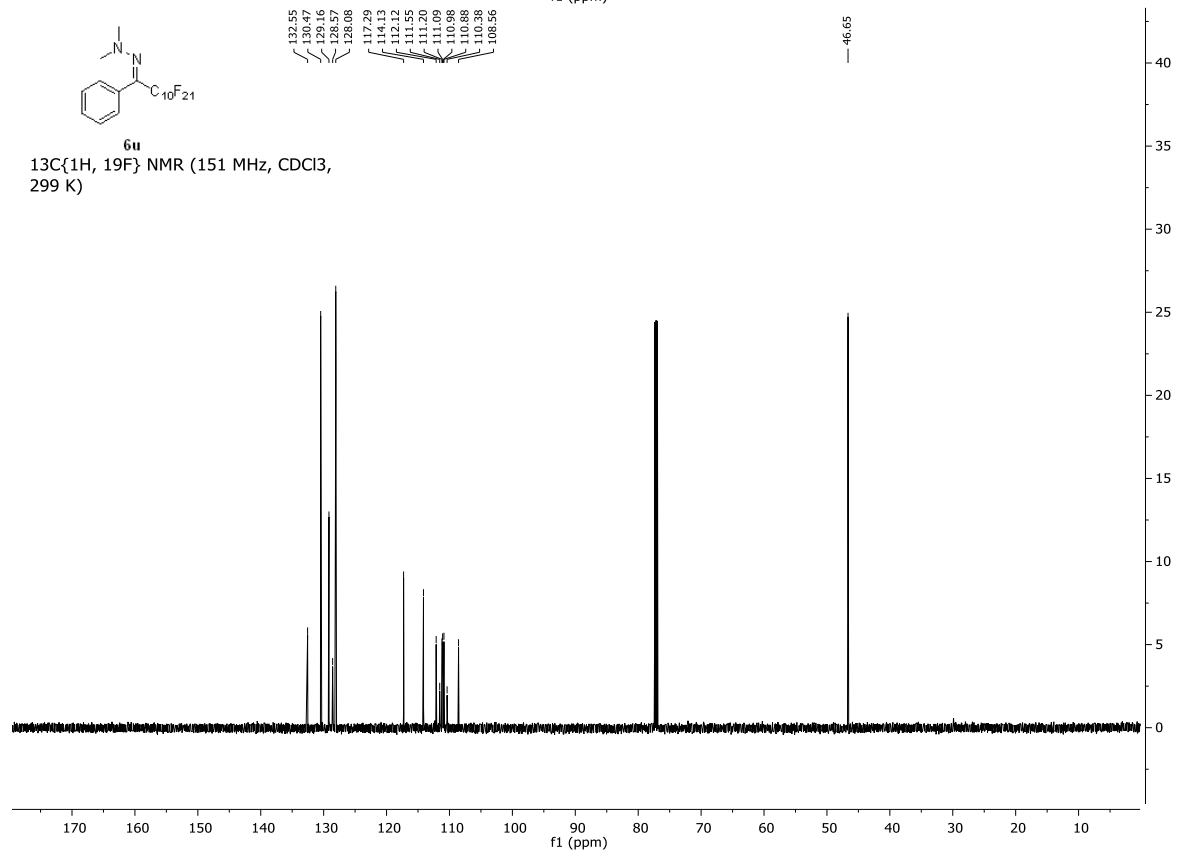

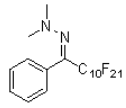

6u

19F NMR (564 MHz, CDCl3, 299 K)

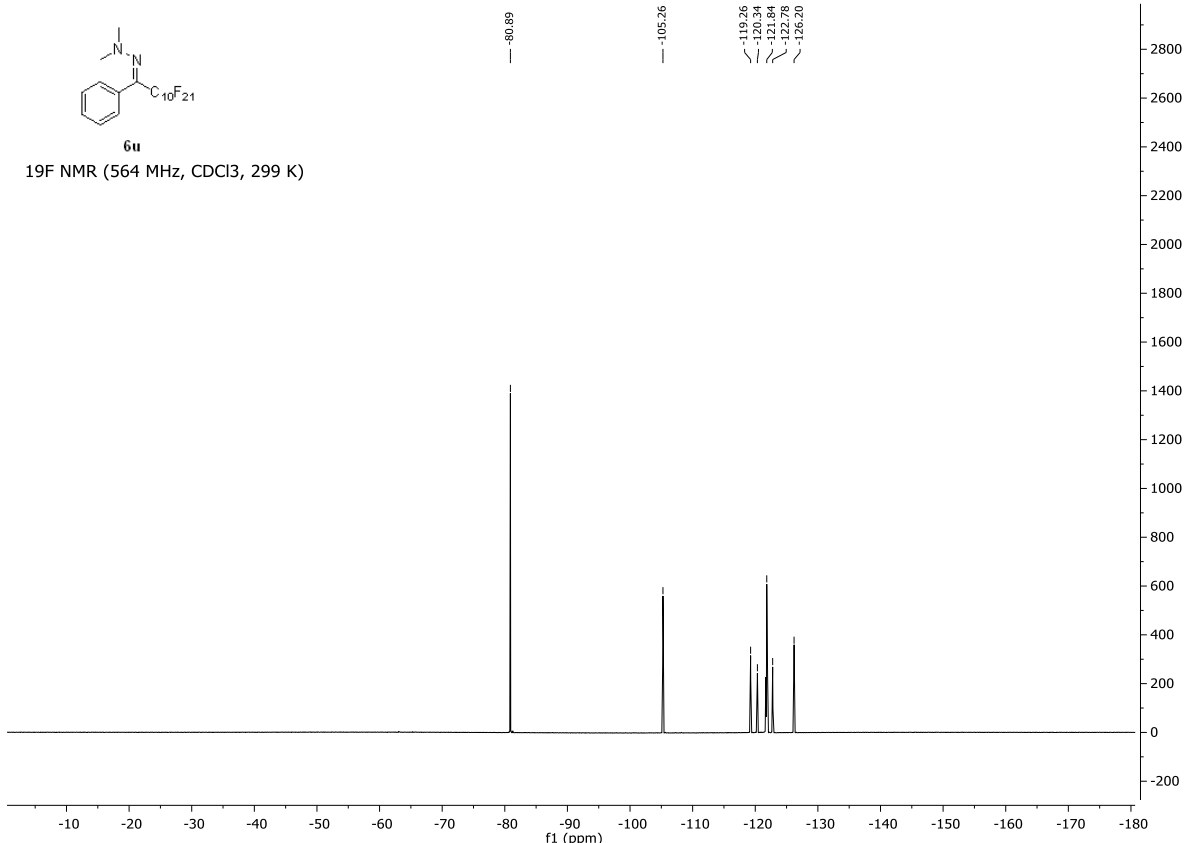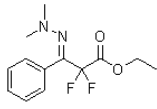

6v

1H NMR (600 MHz, CDCl3, 300 K)

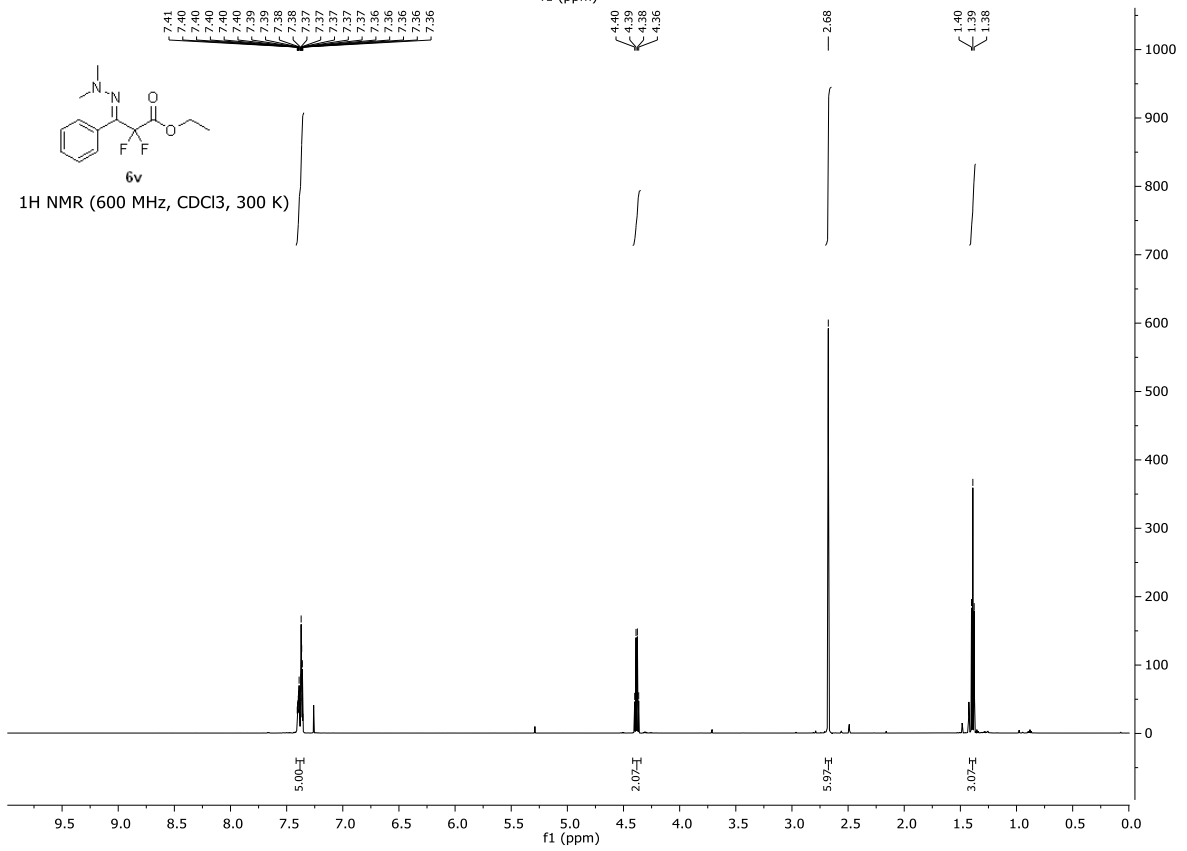

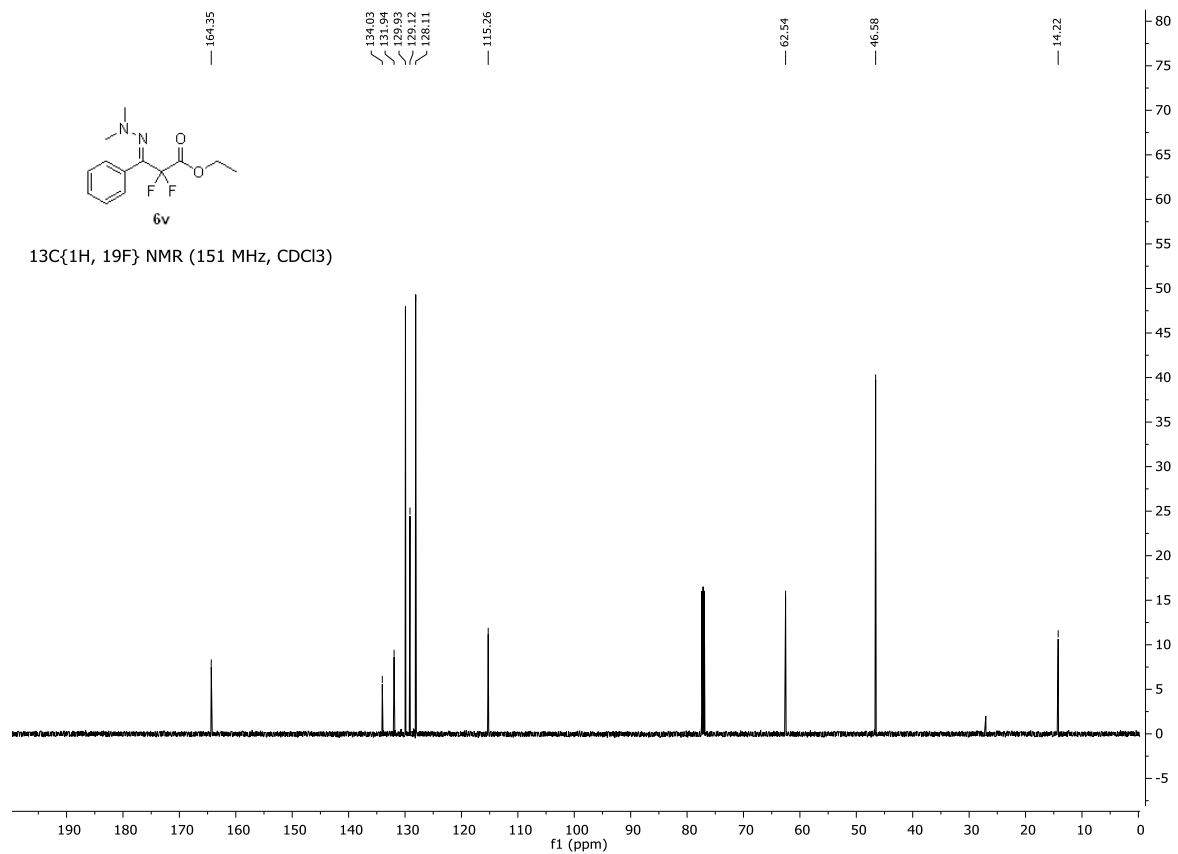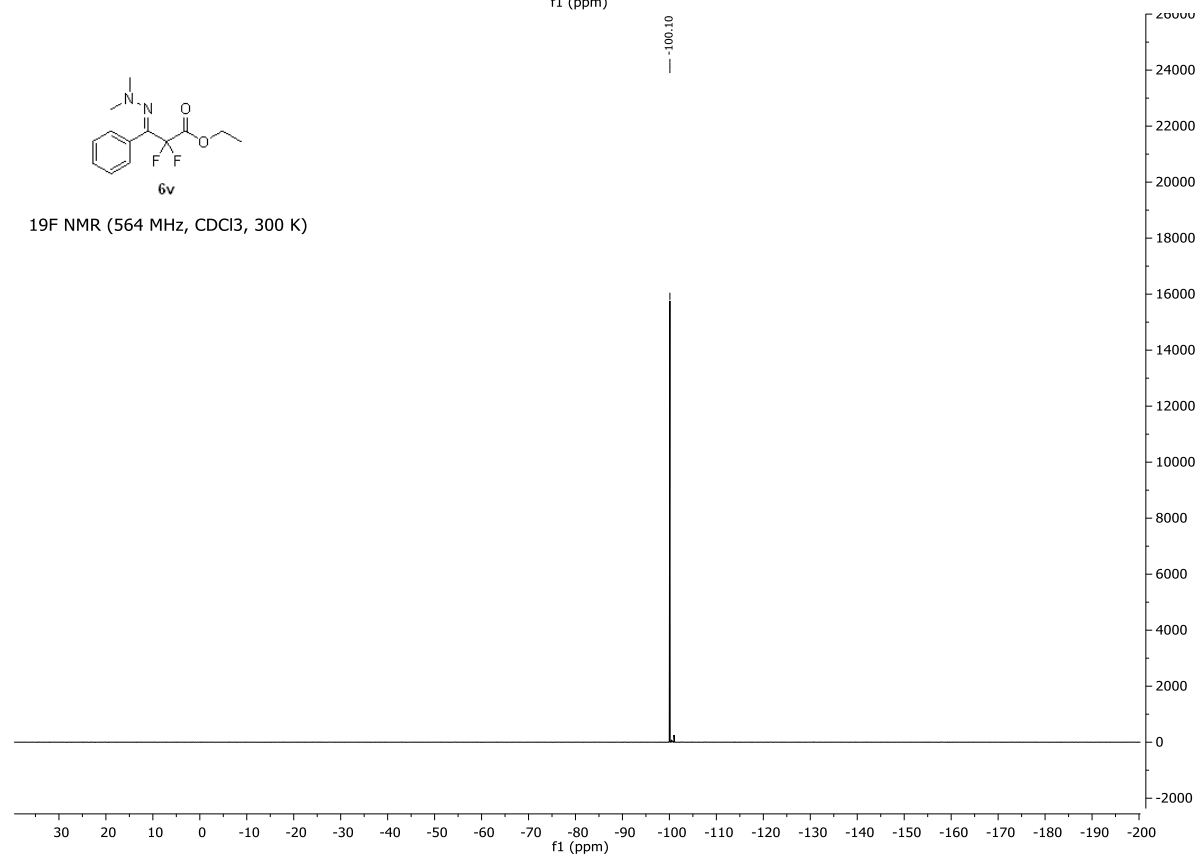

Supplement: jo7b00934_si_001.pdf [file jo7b00934_si_001.pdf]
